# Supplementary material for: Covid-19 Vaccination and Mental Stress within Diverse Socio-demographic Groups
Source: Preprints.org preprint supplement (doi:10.20944/preprints202208.0350.v1), 2022-08-18
Supplement: Supplementary file 1 [file Supplementary Information S3 (Dataset).xlsx]

## Sheet: Sheet 1
3. What is your Age group?	4. What is your Gender?	4.a. If you selected Other, please specify:	5. What is your Ethnic background?	5.a. If you selected Other, please specify:	6. Which Professional sector do you belong to?	6.a. If you selected Other, please specify:	7. Do you have any of the below diseases/illness?	7.a. If you selected Other, please specify:	8. When did you test positive for Covid-19?	8.a. If you selected Other, please specify:	9. What was the severity of your symptoms over COVID-19?	9.a. If you selected Other, please specify:	10. How long were you actually ill?	10.a. If you selected Other, please specify:	11. Do you believe you suffer from ‘Long COVID’?	11.a. If yes, have you been referred for management?	12. What was the effects on your personal life? Tick all that apply	13. Did you ever feel Stress due to Covid-19 or its effects on your life?	13.a. If yes, then what was the major cause of Stress?	13.a.i. If you selected Other, please specify:	14. And what you do if feel stressed (to reduce your stress level)?	14.a. If you selected Other, please specify:	15. Are you aware of Covid-19 Vaccine?	16. Which type of Covid-19 vaccine did you take (if any)?	16.a. If you selected Other, please specify:	17. Do you feel less stress after the vaccination?	18. Which of the following side effects did you feel due to Covid-19 vaccination?	18.a. If you selected Other, please specify:	19. What was the duration of after-affects?	20. Would you be happy for the vaccine to be given to:	21. Do you feel safe having the vaccine?	21.a. If No, what is your concern?	21.a.i. If you selected Other, please specify:	22. Following complete vaccination of the population, please select what measures you feel are appropriate?	23. Is your time spent on TV/Entertainments/Social Media Increased during pandemic?	24. Do you try your best to have social distancing?	25. Do you feel that shopping is stressful for the current situation?	26. Do you do online shopping due to Pandemic?
50 to 60	Male		Other	Arab	Medical (e.g. NHS, Pharmacy)		None		Never		I never had Covid-19		I never had Covid-19		No			Yes	Covid-19		Engage in hobbies		Yes	Pfizer-BioNTech		Yes	Headache,Pain in muscle/swelling		Less than a week	Yourself,Children,Family	Yes			Social distancing,Mask wearing	No	Yes	No	No
Under 20	Male		Asian/Asian British/Arabic		Education/Academia		None		Sept 2020 to December 2020		Symptoms managed at home		Up to 7 days		No	No	Reduction in fitness,Negative impact on mental health	Yes	Covid-19,Studies/Performance		Sports/Games		Yes	None						Don’t know	Yes			Lockdown and observe R rate for longer,Tier response system,Social distancing,Mask wearing	Yes	Yes	No	Yes
41 to 50	Male		Asian/Asian British/Arabic		Self employed		None		Never		I never had Covid-19		I never had Covid-19		No	No		Yes	Covid-19,Work,Studies/Performance,Relationships,Childcare/ school closures		Watch movies/TV shows etc.,Excessive use of social media,Speak to family/ friends		Yes	None						Yourself	Yes			Lockdown and observe R rate for longer,Tier response system	Yes	Yes	Yes	Yes
31 to 40	Male		Asian/Asian British/Arabic		Medical (e.g. NHS, Pharmacy)		None		Jan 2020 to April 2020		Symptoms managed at home		Up to 7 days		No	No	Development of other illnesses,Reduction in fitness	Yes	Work,Relationships		Watch movies/TV shows etc.,Excessive use of social media		Yes	None						Yourself,Family	Yes			Social distancing,Mask wearing	Yes	Yes	Yes	Yes
Under 20	Male		White British		Other	Government	None		Never		I never had Covid-19		I never had Covid-19		No	No		Yes	Pandemic		Sports/Games,Speak to family/ friends,Engage in hobbies		Yes	None		No				Yourself,Family	No	Other	Didn’t have vaccine	Social distancing,Mask wearing	Yes	Yes	Yes	Yes
31 to 40	Male		Asian/Asian British/Arabic		Other	Hospitality	None		Never		I never had Covid-19		I never had Covid-19		No	No		No	Pandemic		I don't feel any stress due to Covid-19		Yes	Pfizer-BioNTech		Yes	None			Yourself,Children,Family	Yes			Lockdown and observe R rate for longer,Social distancing,Mask wearing	Yes	Yes	No	Yes
21 to 30	Male		Asian/Asian British/Arabic		Education/Academia		None		Never		I never had Covid-19		I never had Covid-19		No	No		No	Relationships		Watch movies/TV shows etc.,Excessive use of social media,Sports/Games,Speak to family/ friends,Engage in hobbies		Yes	None						Yourself,Children,Family	Yes			Social distancing	Yes	No	Yes	Yes
31 to 40	Male		Asian/Asian British/Arabic		Self employed		None		Sept 2020 to December 2020		Symptoms managed at home		Up to 14 days		No	No	Sick leave extending longer than self-isolation period	No	Relationships		Speak to family/ friends		No	None					Over 2 weeks	Don’t know	No	Side effects		Tier response system	Yes	Yes	No	Yes
31 to 40	Female		Asian/Asian British/Arabic		Education/Academia		None		Sept 2020 to December 2020		Symptoms managed at home		Up to 3 days		No	No	Reduction in fitness	Yes	Work,Pandemic,Childcare/ school closures		Watch movies/TV shows etc.,Engage in hobbies,I don't feel any stress due to Covid-19		Yes	None					Less than a week	Yourself,Children,Family	Yes			Lockdown and observe R rate for longer,Social distancing,Mask wearing	Yes	Yes	Yes	Yes
41 to 50	Male		Asian/Asian British/Arabic		Transport/Logistics		None		Never		I never had Covid-19		I never had Covid-19		No	No		Yes	Covid-19,Pandemic		I don't feel any stress due to Covid-19		Yes	None						Don’t know	No			Tier response system	Yes	Yes	Yes	Yes
Under 20	Female		Asian/Asian British/Arabic		Education/Academia		None		January 2021 and onwards		Symptoms requiring GP appointment/ 111 advice		Up to 14 days		Yes	No	Sick leave extending longer than self-isolation period,Development of other illnesses,Reduction in fitness,Negative impact on mental health,Negative impact on relationships	Yes	Covid-19		Watch movies/TV shows etc.,Excessive use of social media,Speak to family/ friends		Yes	None			None			Yourself,Family	No	Side effects		Lockdown and observe R rate for longer,Mask wearing	Yes	Yes	Yes	Yes
Under 20	Male		Asian/Asian British/Arabic		Other	Student	None		Never		I never had Covid-19		I never had Covid-19		No	No		Yes	Covid-19,Pandemic,Studies/Performance,Finance		Watch movies/TV shows etc.,Excessive use of social media,Sports/Games		Yes	Other	Sinopharm	Yes	Tired,Headache,Fever,Aches/chills		Less than a week	Yourself,Family	Yes			Social distancing,Mask wearing	Yes	Yes	Yes	Yes
41 to 50	Female		Asian/Asian British/Arabic		Other	IT	None		Never		I never had Covid-19		I never had Covid-19		No	No		Yes	Other	Health and wellbeing of my extended family	Watch movies/TV shows etc.,Speak to family/ friends		Yes	None						Yourself,Family	Yes			Social distancing,Mask wearing	Yes	Yes	No	No
21 to 30	Male		Asian/Asian British/Arabic		Other	Food production	None		Never		I never had Covid-19		I never had Covid-19		No	No		Yes	Covid-19,Vaccine,Pandemic		Excessive use of social media,Speak to family/ friends		Yes	None						Don’t know	No	Side effects,Personal beliefs		Lockdown and observe R rate for longer	Yes	Yes	Yes	No
Under 20	Female		Asian/Asian British/Arabic		Other	Computing	None		Never		I never had Covid-19		I never had Covid-19		No	No		Yes	Studies/Performance		Watch movies/TV shows etc.		No	None						Yourself,Children,Family	No	Side effects		Mask wearing	Yes	Yes	No	Yes
50 to 60	Male		White British		Education/Academia		None		Never		I never had Covid-19		I never had Covid-19		No			Yes	Covid-19,Work,Pandemic,Relationships,Childcare/ school closures		Watch movies/TV shows etc.,Engage in hobbies		Yes	Oxford-AstraZeneca		No	Headache,Fever,Pain in muscle/swelling		Less than a week	Yourself,Children,Family	Yes			Tier response system,Social distancing,Mask wearing	Yes	Yes	Yes	No
60 to 70	Male		White British		Education/Academia		None		Never		I never had Covid-19		I never had Covid-19		No			No			I don't feel any stress due to Covid-19		Yes	Oxford-AstraZeneca		No	Tired,Headache,Fever,Pain in muscle/swelling,Nausea		Less than a week	Yourself,Children,Family	Yes			Tier response system,Social distancing,Mask wearing	Yes	Yes	No	Yes
50 to 60	Male		White British		Education/Academia		None		Never		I never had Covid-19		I never had Covid-19		No	No		Yes	Relationships		Watch movies/TV shows etc.,Other	Long walks	Yes	Oxford-AstraZeneca		Yes	Headache,Pain in muscle/swelling		Less than a week	Yourself,Children,Family	Yes			No restrictions	Yes	Yes	Yes	No
31 to 40	Male		White European		Education/Academia		None		January 2021 and onwards		I never had Covid-19		I never had Covid-19		No			No			Other	Reading	Yes	Oxford-AstraZeneca		Yes	Tired,Aches/chills		Less than a week	Don’t know	Yes			No restrictions	No	Yes	No	Yes
31 to 40	Female		White European		Education/Academia		None		Never		I never had Covid-19		I never had Covid-19		No			Yes	Covid-19,Work,Studies/Performance,Childcare/ school closures		Other	Nothing	Yes	None						Yourself,Family	Yes			Tier response system,Social distancing,Mask wearing	No	Yes	Yes	Yes
50 to 60	Female		White British		Education/Academia		Other	coeliac disease	Never		I never had Covid-19		I never had Covid-19		No	No		Yes			Sports/Games		Yes	Pfizer-BioNTech		No	Other	tenderness around injection site	Less than a week	Family	Yes			Mask wearing	Yes	Yes	No	No
41 to 50	Female		White European		Education/Academia		None		Never		I never had Covid-19		I never had Covid-19		No			Yes	Work,Childcare/ school closures		Speak to family/ friends,Engage in hobbies,Other	reading books about purpose of life	Yes	Oxford-AstraZeneca		No	Tired,Fever		Less than a week	Children	Yes			Tier response system	No	Yes	Yes	Yes
41 to 50	Female		Other	Arabic	Medical (e.g. NHS, Pharmacy)		A problem with your spleen or your spleen has been removed (splenectomy),None		Never		I never had Covid-19		I never had Covid-19		No			Yes	Vaccine,Work,Pandemic,Finance,Relationships,Childcare/ school closures		Sports/Games,Speak to family/ friends		Yes	Oxford-AstraZeneca		No	Headache		Less than a week	None	Yes			No restrictions	Yes	No	Yes	No
50 to 60	Male		Asian/Asian British/Arabic		Medical (e.g. NHS, Pharmacy)		None		Sept 2020 to December 2020		Symptoms managed at home		Up to 3 days		No		Reduction in fitness	Yes	Covid-19,Other	Running. It knocked me back	Engage in hobbies,Other	Get on with it	Yes	Pfizer-BioNTech		Yes	Fever,Pain in muscle/swelling,Other	No sleep	Less than a week	Yourself,Family	Yes			Social distancing	Yes	Yes	No	No
50 to 60	Female		White British		Medical (e.g. NHS, Pharmacy)		None		Never		Symptoms managed at home		Up to 14 days		No	No	Negative impact on mental health	No			I don't feel any stress due to Covid-19		Yes	Pfizer-BioNTech		No	Pain in muscle/swelling		Less than a week	Yourself,Children,Family	Yes			Mask wearing	No	Yes	No	No
60 to 70	Female		White European		Medical (e.g. NHS, Pharmacy)		None		Never		Symptoms managed at home		Up to 7 days		No	No	Reduction in fitness	No			I don't feel any stress due to Covid-19		Yes	Oxford-AstraZeneca		No	Tired,Strange feeling,Headache,Fever,Aches/chills,Pain in muscle/swelling,Nausea		Less than a week	Yourself,Family	Yes			No restrictions	Yes	No	No	No
50 to 60	Female		White British		Medical (e.g. NHS, Pharmacy)		None		Never		I never had Covid-19		I never had Covid-19		No			Yes	Work		Speak to family/ friends		Yes	Oxford-AstraZeneca		No	Headache,Fever,Aches/chills,Pain in muscle/swelling		Less than a week	Yourself,Children,Family	Yes			Social distancing,Mask wearing	Yes	Yes	No	Yes
21 to 30	Female		White British		Medical (e.g. NHS, Pharmacy)		None		Never		I never had Covid-19		I never had Covid-19		No			No			I don't feel any stress due to Covid-19		Yes	None						Yourself,Family	Yes			No restrictions	Yes	Yes	No	No
50 to 60	Male		White British		Medical (e.g. NHS, Pharmacy)		None		Never		I never had Covid-19		I never had Covid-19		No	No		Yes	Covid-19,Work,Pandemic		Sports/Games,Engage in hobbies		Yes	Pfizer-BioNTech		Yes	None		Less than a week	Yourself,Children,Family	Yes			No restrictions	No	Yes	Yes	Yes
50 to 60	Female		White British		Medical (e.g. NHS, Pharmacy)		Diabetes		Never		I never had Covid-19		I never had Covid-19		No			Yes	Other	Not being able to meet friends and family	Watch movies/TV shows etc.,Speak to family/ friends,Other	Walking	Yes	Pfizer-BioNTech		Yes	Headache,Aches/chills,Pain in muscle/swelling		Less than a week	Yourself,Children,Family	Yes			Social distancing,Mask wearing	Yes	Yes	Yes	No
21 to 30	Female		White British		Medical (e.g. NHS, Pharmacy)		None		Sept 2020 to December 2020		Symptoms managed at home		Up to 14 days		No	No	Sick leave extending longer than self-isolation period	Yes	Covid-19,Work,Pandemic		Watch movies/TV shows etc.,Speak to family/ friends		Yes	Pfizer-BioNTech		Yes	Tired,Headache,Nausea		Less than a week	Family	Yes			No restrictions	Yes	Yes	No	No
31 to 40	Male		White British		Medical (e.g. NHS, Pharmacy)		On medicine that makes you much more likely to get infections (such as high doses of steroids or immunosuppressant medicine)		Never		I never had Covid-19		I never had Covid-19		No		Reduction in fitness,Negative impact on mental health	Yes	Other	The general public	Watch movies/TV shows etc.,Engage in hobbies		Yes	None						Don’t know	No	Other	Distrust of the government	No restrictions	Yes	Yes	Yes	Yes
50 to 60	Male		Asian/Asian British/Arabic		Self employed		Diabetes		Never		I never had Covid-19		I never had Covid-19		No	No		No			Other	Relaxed	Yes	Oxford-AstraZeneca		No	None		Less than a week	Yourself,Family	Yes			No restrictions	No	Yes	Yes	No
41 to 50	Female		Asian/Asian British/Arabic		Education/Academia		None		Never		I never had Covid-19		I never had Covid-19		No			Yes	Other	Disruption of “normal” life	Watch movies/TV shows etc.,Engage in hobbies		Yes	Pfizer-BioNTech		Yes	Pain in muscle/swelling		Less than a week	Family	Yes			Mask wearing,No restrictions	Yes	Yes	Yes	Yes
41 to 50	Female		White British		Medical (e.g. NHS, Pharmacy)		None		Never		I never had Covid-19		I never had Covid-19		No	No		Yes	Childcare/ school closures		Sports/Games		Yes	Pfizer-BioNTech		Yes	Pain in muscle/swelling		Less than a week	Family	Yes			Social distancing,Mask wearing	Yes	Yes	No	Yes
21 to 30	Male		White British		Medical (e.g. NHS, Pharmacy)		None		Never		Symptoms managed at home		Up to 3 days		No	No	Reduction in fitness	No			I don't feel any stress due to Covid-19		Yes	Oxford-AstraZeneca		No	Tired,Fever,Aches/chills,Nausea		Less than a week	Yourself	Yes			No restrictions	No	No	No	No
60 to 70	Male		Asian/Asian British/Arabic		Other	Restaurant	None		Never		I never had Covid-19		I never had Covid-19		No	No		No			I don't feel any stress due to Covid-19		Yes	Oxford-AstraZeneca		No	None		Less than a week	Yourself,Children,Family	Yes			Social distancing,Mask wearing	Yes	Yes	Yes	Yes
50 to 60	Female		Asian/Asian British/Arabic		Other	Housewife	Diabetes		Never		I never had Covid-19		I never had Covid-19		No	No		Yes	Covid-19,Vaccine,Pandemic		Excessive use of social media		Yes	Oxford-AstraZeneca		Yes	Tired,Pain in muscle/swelling		Less than a week	Yourself,Children,Family	Yes			Social distancing,Mask wearing	Yes	Yes	Yes	No
Under 20	Male		Asian/Asian British/Arabic		Education/Academia		None		Sept 2020 to December 2020		Symptoms managed at home		Up to 3 days		No	No	Reduction in fitness,Negative impact on mental health	No			Watch movies/TV shows etc.,Excessive use of social media,Sports/Games,Speak to family/ friends,Engage in hobbies		Yes	None						Yourself,Family	Yes			Social distancing,Mask wearing	Yes	Yes	No	Yes
Under 20	Male		White British		Education/Academia		None		Never		I never had Covid-19		I never had Covid-19		No	No		No			I don't feel any stress due to Covid-19		Yes	None						Yourself,Family	Yes			Tier response system	Yes	Yes	Yes	Yes
41 to 50	Male		Black, African, Caribbean or Black British		Medical (e.g. NHS, Pharmacy)		None		Jan 2020 to April 2020		Symptoms managed at home		Up to 3 days		No			No			Speak to family/ friends,Engage in hobbies		Yes	Pfizer-BioNTech		Yes	Tired,Aches/chills		Less than a week	Yourself,Children,Family	Yes			Social distancing	Yes	Yes	Yes	Yes
31 to 40	Male		Black, African, Caribbean or Black British		Medical (e.g. NHS, Pharmacy)		None		Never		I never had Covid-19		I never had Covid-19		No	No		No			Watch movies/TV shows etc.,Sports/Games,Engage in hobbies		Yes	Pfizer-BioNTech		Yes	Pain in muscle/swelling		Less than a week	Yourself,Family	Yes			Tier response system	No	Yes	No	No
50 to 60	Female		Asian/Asian British/Arabic		Medical (e.g. NHS, Pharmacy)		None		Never		I never had Covid-19		I never had Covid-19		No	No		Yes	Work		Sports/Games		Yes	Pfizer-BioNTech		No	Tired		Less than a week	Family	Yes			Social distancing	Yes	Yes	No	No
41 to 50	Male		Asian/Asian British/Arabic		Media/Journalism		None		Never		I never had Covid-19		I never had Covid-19		No	No		Yes	Covid-19,Pandemic,Studies/Performance,Finance,Childcare/ school closures		Watch movies/TV shows etc.,Excessive use of social media,Speak to family/ friends		Yes	None						Don’t know	No			Mask wearing	Yes	Yes	Yes	Yes
50 to 60	Male		Other	Arabic	Medical (e.g. NHS, Pharmacy)		None		May 2020 to August 2020		Symptoms managed at home		Up to 14 days		No		Sick leave extending longer than self-isolation period	No			I don't feel any stress due to Covid-19		Yes	Pfizer-BioNTech		Yes	Tired,Headache,Aches/chills,Pain in muscle/swelling		Less than a week	Family	Yes			Social distancing	Yes	Yes	Yes	Yes
50 to 60	Male		White European		Medical (e.g. NHS, Pharmacy)		None		Never		I never had Covid-19		I never had Covid-19		No			Yes	Relationships		Sports/Games		Yes	Pfizer-BioNTech		No	None		Less than a week	Yourself,Children,Family	Yes			Tier response system	No	Yes	No	No
50 to 60	Male		Asian/Asian British/Arabic		Medical (e.g. NHS, Pharmacy)		None		Never		I never had Covid-19		I never had Covid-19		Yes	Yes		No			I don't feel any stress due to Covid-19		Yes	Pfizer-BioNTech		No	Pain in muscle/swelling		Less than a week	Yourself,Family	Yes			Lockdown and observe R rate for longer,Social distancing,Mask wearing	Yes	Yes	No	Yes
50 to 60	Female		White British		Other	NHS receptionist gp practice	None		Never		I never had Covid-19		I never had Covid-19		No			Yes	Work,Pandemic		Watch movies/TV shows etc.,Excessive use of social media,Speak to family/ friends		Yes	Pfizer-BioNTech		Yes	Tired,Headache,Aches/chills,Pain in muscle/swelling		Less than a week	Yourself,Family	Yes			No restrictions	No	Yes	No	Yes
50 to 60	Female		White British		Other	Customer service	None		Never		I never had Covid-19		I never had Covid-19		No	No		Yes	Work		Watch movies/TV shows etc.,Excessive use of social media,Speak to family/ friends,Engage in hobbies		Yes	Oxford-AstraZeneca		No	Tired,Headache,Aches/chills,Pain in muscle/swelling		Less than 2 weeks	Yourself,Family	Yes			Tier response system,Social distancing,Mask wearing	Yes	Yes	Yes	Yes
50 to 60	Female		White European		Carer services		None		Never		I never had Covid-19		I never had Covid-19		No			No			Speak to family/ friends,Engage in hobbies		Yes	Pfizer-BioNTech		No	Pain in muscle/swelling		Less than a week	Yourself,Children,Family	Yes			Tier response system	Yes	Yes	No	Yes
50 to 60	Female		Asian/Asian British/Arabic		Medical (e.g. NHS, Pharmacy)		None		Never		I never had Covid-19		I never had Covid-19		No			Yes	Work,Pandemic,Studies/Performance,Relationships,Childcare/ school closures		Watch movies/TV shows etc.,Excessive use of social media,Speak to family/ friends		Yes	Pfizer-BioNTech		No	Tired,Pain in muscle/swelling		Less than a week	Children,Family	Yes			Mask wearing,No restrictions	No	Yes	Yes	Yes
60 to 70	Male		Other	Middle Eastern	Other	Retired	Diabetes		Never		I never had Covid-19		I never had Covid-19		No			No			I don't feel any stress due to Covid-19		Yes	Oxford-AstraZeneca		Yes	Headache		Less than a week	Yourself	Yes			Social distancing,Mask wearing	No	Yes	Yes	No
31 to 40	Female		White British		Education/Academia		None		Never		I never had Covid-19		I never had Covid-19		No			Yes	Pandemic		Speak to family/ friends,Engage in hobbies		Yes	Oxford-AstraZeneca		Yes	None		Less than a week	Yourself,Children,Family	Yes			Social distancing,Mask wearing	Yes	Yes	Yes	No
41 to 50	Male		Asian/Asian British/Arabic		Transport/Logistics		None		Never		I never had Covid-19		I never had Covid-19		No	No		No			Sports/Games		Yes	Oxford-AstraZeneca		Yes	Tired,Other	Very active, I was buzzing didn’t go to sleep until 06:00am	Less than a week	Yourself,Children,Family	Yes			Mask wearing	No	Yes	No	Yes
31 to 40	Female		Asian/Asian British/Arabic		Finance services/Banking/Insurance		None		Never		I never had Covid-19		I never had Covid-19		No	No		No			I don't feel any stress due to Covid-19		Yes	Oxford-AstraZeneca		No	Pain in muscle/swelling		Less than a week	Yourself,Family	Yes			Social distancing,Mask wearing	Yes	Yes	No	Yes
60 to 70	Female		Asian/Asian British/Arabic		Medical (e.g. NHS, Pharmacy)		None		Never		I never had Covid-19		I never had Covid-19		No			Yes	Other	Fear for family	Other	Pray	Yes	Other	Moderna	Yes	Other	Pain on site of injection	Less than a week	Yourself,Family	Yes			Tier response system,Social distancing,Mask wearing	Yes	Yes	Yes	No
41 to 50	Female		Asian/Asian British/Arabic		Law		A severe lung condition (such as cystic fibrosis, severe asthma or severe COPD)		Never		I never had Covid-19		I never had Covid-19		No			Yes	Covid-19,Vaccine,Pandemic		Sports/Games		Yes	None			None			Don’t know	No	Side effects,History of allergy		Lockdown and observe R rate for longer	Yes	Yes	No	Yes
60 to 70	Female		Other	Iraqi	Other	House wife	None		Never		I never had Covid-19		I never had Covid-19		No			Yes	Covid-19,Vaccine,Pandemic,Relationships		Watch movies/TV shows etc.,Speak to family/ friends		Yes	Oxford-AstraZeneca		Yes	Other	Pain in the arm	Less than a week	Yourself,Children,Family	Yes			Lockdown and observe R rate for longer,Tier response system,Social distancing,Mask wearing	Yes	Yes	Yes	Yes
31 to 40	Female		White European		Education/Academia		None		Never		I never had Covid-19		I never had Covid-19		No			Yes	Work,Pandemic,Relationships,Childcare/ school closures		Sports/Games		Yes	Oxford-AstraZeneca		Yes	Aches/chills,Pain in muscle/swelling		Less than a week	Yourself,Children,Family	Yes			Mask wearing,No restrictions	No	Yes	Yes	No
41 to 50	Female		White British		Medical (e.g. NHS, Pharmacy)		None		Never		I never had Covid-19		I never had Covid-19		No	No		Yes	Work		Watch movies/TV shows etc.,Speak to family/ friends,Engage in hobbies		Yes	Pfizer-BioNTech		No	Pain in muscle/swelling		Less than a week	Yourself,Children,Family	Yes			Tier response system,Social distancing,Mask wearing	No	Yes	No	No
60 to 70	Female		White British		Education/Academia		Obesity		Never		I never had Covid-19		I never had Covid-19		No			Yes	Work		Watch movies/TV shows etc.		Yes	Pfizer-BioNTech		Yes	Pain in muscle/swelling		Less than a week	Yourself,Family	Yes			No restrictions	No	Yes	Yes	No
50 to 60	Male		White British		Education/Academia		None		Never		I never had Covid-19		I never had Covid-19		No			Yes	Pandemic		Other	Walking outside	Yes	Oxford-AstraZeneca		Yes	Aches/chills		Less than a week	Yourself,Family	Yes			No restrictions	No	Yes	Yes	No
60 to 70	Female		White British		Charities		None		Never		I never had Covid-19		I never had Covid-19		No			No			I don't feel any stress due to Covid-19		Yes	Pfizer-BioNTech		No	Itchy skin/rash		Less than 2 weeks	Yourself,Family	Yes			Tier response system,Social distancing	Yes	Yes	Yes	Yes
41 to 50	Female		White European		Education/Academia		None		Never		I never had Covid-19		I never had Covid-19		No			Yes	Covid-19,Work,Pandemic		Other	Exercise	Yes	Oxford-AstraZeneca		No	Tired		Less than a week	Yourself,Children,Family	Yes			Tier response system,Mask wearing	No	Yes	No	No
31 to 40	Female		White British		Education/Academia		None		Never		I never had Covid-19		I never had Covid-19		No			Yes	Other	uncertainty	Speak to family/ friends,Engage in hobbies		Yes	None						Yourself,Family	Yes			Social distancing,Mask wearing	Yes	Yes	Yes	Yes
41 to 50	Female		White British		Education/Academia		None		Never		I never had Covid-19		I never had Covid-19		No			Yes	Pandemic,Childcare/ school closures		Engage in hobbies		Yes	Pfizer-BioNTech		Yes	Pain in muscle/swelling		Less than a week	Yourself,Children,Family	Yes			Mask wearing	Yes	Yes	No	Yes
60 to 70	Female		White British		Education/Academia		None		Never		I never had Covid-19		I never had Covid-19		No	No		Yes	Pandemic,Relationships		Engage in hobbies		Yes	Oxford-AstraZeneca		Yes	Tired,Strange feeling,Fever,Aches/chills,Pain in muscle/swelling,Nausea		Less than 2 weeks	Yourself,Children,Family	Yes			Social distancing,Mask wearing	Yes	Yes	No	No
50 to 60	Female		White British		Education/Academia		None		Never		I never had Covid-19		I never had Covid-19		No			Yes	Work		Watch movies/TV shows etc.		Yes	Oxford-AstraZeneca		No	Tired		Less than a week	Yourself,Children,Family	Yes			Tier response system,Social distancing,Mask wearing	Yes	Yes	No	No
31 to 40	Female		White British		Tourism and Travel		None		Never		I never had Covid-19		I never had Covid-19		No			Yes	Work,Pandemic,Relationships		Watch movies/TV shows etc.,Speak to family/ friends,Engage in hobbies		Yes	Pfizer-BioNTech		Yes	Aches/chills,Pain in muscle/swelling		Less than a week	Yourself,Children,Family	Yes			Social distancing,Mask wearing	Yes	Yes	Yes	No
41 to 50	Female		Asian/Asian British/Arabic		Transport/Logistics		None		Never		I never had Covid-19		I never had Covid-19		No	No		Yes	Vaccine		Speak to family/ friends		Yes	Pfizer-BioNTech						Family	No	Side effects,History of allergy		Tier response system,Mask wearing	Yes	No	No	Yes
50 to 60	Female		White British		Education/Academia		None		Never		I never had Covid-19		I never had Covid-19		No	No		No			Sports/Games,Speak to family/ friends,Engage in hobbies		Yes	Oxford-AstraZeneca		No	Tired,Aches/chills		Less than a week	Family	Yes			Social distancing,Mask wearing	Yes	Yes	No	Yes
31 to 40	Female		White British		Education/Academia		None		Never		Asymptomatic			Unknown - asymptomatic. Never tested positive with lateral flow test, but tested positive for antibodies end Jan 2021. Note no effects on personal life but couldn't leave blank so selected no covid.	No			No			I don't feel any stress due to Covid-19		Yes	None						Yourself,Family	Yes			Tier response system	Yes	Yes	Yes	No
41 to 50	Female		Asian/Asian British/Arabic		Carer services		Other	Astma	Never		I never had Covid-19		I never had Covid-19		No	No		Yes	Covid-19,Vaccine,Work,Pandemic,Finance,Childcare/ school closures		Sports/Games,Speak to family/ friends,Engage in hobbies		Yes	None						None	No	Side effects		Social distancing,Mask wearing	Yes	Yes	Yes	Yes
60 to 70	Female		Asian/Asian British/Arabic		Self employed		None		Never		I never had Covid-19		I never had Covid-19		No			Yes	Pandemic,Finance		Speak to family/ friends		Yes	Pfizer-BioNTech		Yes	Tired		Less than a week	Yourself,Children,Family	Yes	Side effects		Social distancing,Mask wearing	Yes	Yes	Yes	Yes
41 to 50	Male		White British		Education/Academia		None		Never		I never had Covid-19		I never had Covid-19		No			No			I don't feel any stress due to Covid-19		Yes	Oxford-AstraZeneca		No	Tired,Pain in muscle/swelling		Less than a week	Yourself,Children,Family	Yes			Mask wearing	No	Yes	Yes	Yes
60 to 70	Female		Asian/Asian British/Arabic		Self employed		None		Never		I never had Covid-19		I never had Covid-19		No			Yes	Covid-19,Pandemic,Finance,Relationships		Speak to family/ friends,Engage in hobbies		Yes	Pfizer-BioNTech		No	Tired		Less than a week	Yourself,Family	No	Side effects		Social distancing,Mask wearing	Yes	Yes	Yes	Yes
50 to 60	Female		White British		Education/Academia		A severe lung condition (such as cystic fibrosis, severe asthma or severe COPD)		Never		I never had Covid-19		I never had Covid-19		No			Yes	Covid-19,Work,Pandemic		Sports/Games,Speak to family/ friends,Engage in hobbies		Yes	Pfizer-BioNTech		No	Fever		Less than a week	Yourself,Children,Family	Yes			Tier response system,Mask wearing	No	Yes	Yes	Yes
60 to 70	Male		Other	Arabic	Media/Journalism		None		Never		I never had Covid-19		I never had Covid-19		No	No		No	Work		I don't feel any stress due to Covid-19		No	Oxford-AstraZeneca		Yes	None		Less than a week	Yourself,Family	Yes			No restrictions	Yes	Yes	No	Yes
50 to 60	Female		White British		Education/Academia		None		January 2021 and onwards		Symptoms requiring GP appointment/ 111 advice		Up to 7 days		No		Reduction in fitness,Negative impact on mental health,Negative impact on relationships	Yes	Covid-19,Work,Studies/Performance,Finance,Relationships,Other	I had a broken leg at the time of getting Covid.	Watch movies/TV shows etc.,Sports/Games,Engage in hobbies		Yes	Oxford-AstraZeneca		No	Tired,Strange feeling,Headache,Fever,Aches/chills,Pain in muscle/swelling,Nausea,Lost smell		Less than a week	Yourself	Yes	Other	I did not tick children or family above only because I have none.	No restrictions	Yes	Yes	No	Yes
50 to 60	Male		White British		Theatre/Performing/Art		None		Never		I never had Covid-19		I never had Covid-19		No			Yes	Covid-19,Vaccine,Work,Pandemic,Relationships,Childcare/ school closures,Other	all the scare tactics and dissinformation in the media	Watch movies/TV shows etc.,Sports/Games,Speak to family/ friends,Engage in hobbies		Yes	None						None	No	Side effects,Personal beliefs,Other	when you remove lawfull recourse if something goes wrong and the companny making these vaxines have a dire record of proven lapses in how they opperate, No thanks!	No restrictions	No	Yes	No	No
41 to 50	Female		White British		Medical (e.g. NHS, Pharmacy)		None		Never		I never had Covid-19		I never had Covid-19		No			No			I don't feel any stress due to Covid-19		Yes	Pfizer-BioNTech		No	Pain in muscle/swelling,Itchy skin/rash		Over 2 weeks	Yourself,Children,Family	Yes			Lockdown and observe R rate for longer,Tier response system,Social distancing,Mask wearing,No restrictions	No	Yes	No	No
50 to 60	Male		Asian/Asian British/Arabic		Self employed		None		Never		I never had Covid-19		I never had Covid-19		No	No		Yes	Pandemic,Other	Vacation	Watch movies/TV shows etc.,Speak to family/ friends,Engage in hobbies		Yes	Oxford-AstraZeneca		No	None		Less than a week	Yourself,Family	Yes			Tier response system,Social distancing,Mask wearing	Yes	Yes	Yes	Yes
21 to 30	Female		Asian/Asian British/Arabic		Medical (e.g. NHS, Pharmacy)		None		Never		I never had Covid-19		I never had Covid-19		No			Yes	Covid-19		Speak to family/ friends		Yes	Pfizer-BioNTech		Yes	Tired,Strange feeling,Headache,Fever,Aches/chills		Less than a week	Family	Yes			Social distancing,Mask wearing	Yes	Yes	Yes	Yes
41 to 50	Male		Asian/Asian British/Arabic		Education/Academia		None		Never		I never had Covid-19		I never had Covid-19		No			Yes	Work		Speak to family/ friends		Yes	None						Family	Yes			Lockdown and observe R rate for longer,Tier response system	Yes	Yes	Yes	Yes
60 to 70	Female		Other	KURDIS ..MIDDETARIAN	Education/Academia		Diabetes		Never		I never had Covid-19		I never had Covid-19		No	No		Yes	Vaccine,Pandemic,Relationships		Watch movies/TV shows etc.,Speak to family/ friends		Yes	Oxford-AstraZeneca		No	Tired,Headache,Pain in muscle/swelling,Dizziness,Other	Poor constration	Over 2 weeks	Don’t know	No	Side effects,History of allergy		Lockdown and observe R rate for longer,Tier response system,Social distancing,Mask wearing	Yes	Yes	Yes	Yes
Under 20	Male		Asian/Asian British/Arabic		Finance services/Banking/Insurance		None		Never		I never had Covid-19		I never had Covid-19		No	No		No			I don't feel any stress due to Covid-19		Yes	None						Yourself,Children,Family	Yes			Social distancing,Mask wearing	Yes	Yes	No	No
Under 20	Male		Asian/Asian British/Arabic		Education/Academia		None		Sept 2020 to December 2020		Symptoms managed at home		Up to 14 days		No		Reduction in fitness	Yes	Studies/Performance		Sports/Games,Engage in hobbies		Yes	None						Yourself,Children,Family	Yes			Tier response system,Social distancing,Mask wearing	Yes	Yes	Yes	Yes
41 to 50	Male		Asian/Asian British/Arabic		Construction/Building		None		Sept 2020 to December 2020		Symptoms managed at home		Up to 14 days		No		Reduction in fitness	Yes	Vaccine,Work,Finance,Relationships		Watch movies/TV shows etc.,Excessive use of social media		Yes	None						None	No	Side effects		Social distancing,Mask wearing	Yes	Yes	Yes	Yes
31 to 40	Female		Asian/Asian British/Arabic		Other	Housewife	None		Never		I never had Covid-19		I never had Covid-19		No			No			I don't feel any stress due to Covid-19		Yes	None						Family	Yes			Social distancing,Mask wearing	No	Yes	No	Yes
41 to 50	Male		Asian/Asian British/Arabic		Self employed		None		Never		I never had Covid-19		I never had Covid-19		No			No			I don't feel any stress due to Covid-19		Yes	Oxford-AstraZeneca		Yes	Fever,Pain in muscle/swelling		Less than a week	Family	Yes			Social distancing,Mask wearing	Yes	Yes	No	Yes
21 to 30	Female		Asian/Asian British/Arabic		Education/Academia		None		Other	Asymptomatic but not tested due to governments limited capacity of testing in April 2020	Symptoms managed at home		Up to 14 days		No		Reduction in fitness,Negative impact on mental health,Negative impact on relationships	Yes	Covid-19,Work,Studies/Performance,Relationships		Watch movies/TV shows etc.,Excessive use of social media,Speak to family/ friends		Yes	Pfizer-BioNTech		Yes	Headache,Fever		Less than a week	Yourself,Family	Yes			Social distancing,Mask wearing	Yes	Yes	No	Yes
21 to 30	Male		Other	Mixed Indian and British	Law		None		Never		I never had Covid-19		I never had Covid-19		No	No		No			I don't feel any stress due to Covid-19		Yes	None						Yourself,Children,Family	Yes			No restrictions	Yes	Yes	No	Yes
60 to 70	Male		Asian/Asian British/Arabic		Transport/Logistics		A serious heart condition and are pregnant		Never		I never had Covid-19		I never had Covid-19		No			Yes	Covid-19		Engage in hobbies		Yes	Oxford-AstraZeneca		Yes	Fever,Aches/chills,Pain in muscle/swelling		Less than a week	Children	Yes			Lockdown and observe R rate for longer,Social distancing,Mask wearing	Yes	Yes	Yes	No
31 to 40	Male		Asian/Asian British/Arabic		Transport/Logistics		None		Never		I never had Covid-19		I never had Covid-19		No	No		No			I don't feel any stress due to Covid-19		Yes	None						None	No	Personal beliefs		No restrictions	Yes	No	No	No
31 to 40	Male		Asian/Asian British/Arabic		Transport/Logistics		None		Never		I never had Covid-19		I never had Covid-19		No	No		Yes	Work,Finance		Engage in hobbies		Yes	None						None	No	Side effects		Social distancing,Mask wearing	No	No	No	Yes
31 to 40	Male		Asian/Asian British/Arabic		Other	Chef	Other	Hey fever	Jan 2020 to April 2020		Symptoms managed at home		Up to 14 days		No	No	Reduction in fitness,Negative impact on mental health	No			I don't feel any stress due to Covid-19		Yes	None						Yourself,Children,Family	Yes			Social distancing,Mask wearing	Yes	Yes	No	No
21 to 30	Male		Asian/Asian British/Arabic		Other	Chef	None		Jan 2020 to April 2020		Symptoms managed at home		Up to 14 days		No	No	Sick leave extending longer than self-isolation period	Yes	Covid-19,Vaccine,Pandemic,Finance		Sports/Games		Yes	Oxford-AstraZeneca		No	Fever		Less than a week	Yourself	Yes			Social distancing,Mask wearing	Yes	Yes	Yes	Yes
50 to 60	Male		Asian/Asian British/Arabic		Transport/Logistics		Other	Pile	Never		I never had Covid-19		I never had Covid-19		No	No		No			I don't feel any stress due to Covid-19		Yes	None						None	No	Personal beliefs		No restrictions	No	No	No	No
41 to 50	Male		Asian/Asian British/Arabic		Self employed		None		Never		I never had Covid-19		I never had Covid-19		No	No		Yes	Covid-19,Vaccine,Work,Pandemic,Finance		Watch movies/TV shows etc.,Excessive use of social media,Sports/Games,Speak to family/ friends,Engage in hobbies		Yes	None						Yourself,Children,Family	Yes			Mask wearing	Yes	Yes	No	No
41 to 50	Male		Asian/Asian British/Arabic		Other	Food service	Other	Celoritus	January 2021 and onwards		Symptoms requiring GP appointment/ 111 advice		Up to 14 days		No	No	Negative impact on mental health	Yes	Covid-19,Vaccine,Work,Pandemic		Watch movies/TV shows etc.,Speak to family/ friends		Yes	None						None	No	Side effects,Personal beliefs		Social distancing	Yes	Yes	Yes	No
41 to 50	Male		Asian/Asian British/Arabic		Self employed		None		Sept 2020 to December 2020		Symptoms managed at home		Up to 7 days		No	No	Reduction in fitness	No			Speak to family/ friends		Yes	None						Yourself,Children,Family	No	Side effects		Lockdown and observe R rate for longer,Tier response system	Yes	No	No	Yes
41 to 50	Male		Asian/Asian British/Arabic		Other	Engineering	Obesity		Jan 2020 to April 2020		Symptoms managed at home		Longer than 14 days		No		Negative impact on mental health	No			Other	Eating	Yes	Oxford-AstraZeneca		No	Aches/chills		Less than a week	None	No	Other	Vontrolling tool by government	No restrictions	No	No	No	No
50 to 60	Male		White British		Education/Academia		None		Never		I never had Covid-19		I never had Covid-19		No			Yes	Other	assault on our civil liberties	Other	stop watching the media.	Yes	None						None	No	Other	Not needed & no long term studies	No restrictions	No	No	No	No
41 to 50	Male		White British		Medical (e.g. NHS, Pharmacy)		None		Never		I never had Covid-19		I never had Covid-19		No	No		Yes	Covid-19,Work,Finance,Childcare/ school closures		Watch movies/TV shows etc.,Excessive use of social media,Engage in hobbies		Yes	Pfizer-BioNTech		Yes	Tired,Headache,Aches/chills,Pain in muscle/swelling,Vomiting		Less than a week	Yourself,Children,Family	Yes			Tier response system	Yes	Yes	Yes	Yes
Over 70	Male		White British		Other	Retired	None		Never		I never had Covid-19		I never had Covid-19		No	No		No			I don't feel any stress due to Covid-19		Yes	Pfizer-BioNTech		Yes	None		Less than a week	Yourself,Children,Family	Yes			No restrictions	Yes	Yes	No	Yes
41 to 50	Female		White British		Education/Academia		None		Never		I never had Covid-19		I never had Covid-19		No			Yes	Childcare/ school closures		Engage in hobbies		Yes	Oxford-AstraZeneca		Yes	Tired,Aches/chills,Pain in muscle/swelling		Less than a week	Yourself,Children,Family	Yes			Tier response system,Social distancing,Mask wearing	Yes	Yes	Yes	Yes
41 to 50	Male		Asian/Asian British/Arabic		Education/Academia		None		Never		I never had Covid-19		I never had Covid-19		No	No		No	Childcare/ school closures		Speak to family/ friends		Yes	Pfizer-BioNTech		Yes	Pain in muscle/swelling		Less than a week	Family	Yes			Tier response system,Mask wearing	No	Yes	Yes	Yes
31 to 40	Female		White British		Education/Academia		None		Sept 2020 to December 2020		Symptoms managed at home		Longer than 14 days		No		Reduction in fitness	Yes	Vaccine,Pandemic		Watch movies/TV shows etc.,Speak to family/ friends,Engage in hobbies		Yes	None						Family	No	Side effects,Needle-phobia		Social distancing,Mask wearing,No restrictions	Yes	Yes	No	No
41 to 50	Female		White British		Education/Academia		None		Never		I never had Covid-19		I never had Covid-19		No			Yes	Covid-19,Work,Pandemic		Watch movies/TV shows etc.,Sports/Games,Speak to family/ friends,Engage in hobbies		Yes	Oxford-AstraZeneca		Yes	None		Less than a week	Yourself,Children,Family	Yes			Tier response system,Mask wearing	Yes	Yes	Yes	Yes
41 to 50	Female		White British		Education/Academia		None		Never		I never had Covid-19		I never had Covid-19		No	No		No			I don't feel any stress due to Covid-19		Yes	Oxford-AstraZeneca		Yes	Tired,Headache,Fever,Aches/chills,Pain in muscle/swelling,Nausea		Less than a week	Yourself,Family	Yes			Social distancing,Mask wearing	No	Yes	Yes	Yes
41 to 50	Female		White British		Education/Academia		None		Never		I never had Covid-19		I never had Covid-19		No			Yes	Pandemic,Relationships		Watch movies/TV shows etc.,Other	yoga, deep breathing, excercise	Yes	Pfizer-BioNTech		Yes	Pain in muscle/swelling		Less than a week	Yourself,Family	Yes			Social distancing,Mask wearing	No	Yes	Yes	No
41 to 50	Male		White British		Education/Academia		None		Never		I never had Covid-19		I never had Covid-19		No			Yes	Work,Pandemic,Finance,Relationships		Watch movies/TV shows etc.,Engage in hobbies		Yes	Other	Moderna	Yes	Pain in muscle/swelling		Less than a week	Yourself,Family	Yes			No restrictions	No	Yes	No	Yes
50 to 60	Male		White British		Education/Academia		None		Never		I never had Covid-19		I never had Covid-19		No	No		Yes	Work,Pandemic		Sports/Games,Speak to family/ friends		Yes	Oxford-AstraZeneca		Yes	Headache,Aches/chills		Less than a week	Yourself,Children,Family	Yes			Tier response system,No restrictions	No	Yes	Yes	No
50 to 60	Female		White British		Education/Academia		None		Never		I never had Covid-19		I never had Covid-19		No			Yes	Covid-19		Other	walked every day during lock down 1	Yes	Oxford-AstraZeneca		No	Fever,Aches/chills,Pain in muscle/swelling,Nausea		Less than a week	Family	Yes			Tier response system,Mask wearing	Yes	Yes	Yes	Yes
31 to 40	Female		White British		Education/Academia		Diabetes,Obesity		Never		I never had Covid-19		I never had Covid-19		No			Yes	Work		Other	survive	Yes	Oxford-AstraZeneca		Yes	Tired,Strange feeling,Headache,Fever,Aches/chills,Allergic reactions,Pain in muscle/swelling,Nausea,Enlarged lymph nodes		Over 2 weeks	Family	No	Side effects,History of allergy		Social distancing,Mask wearing	Yes	Yes	Yes	Yes
41 to 50	Male		White British		Education/Academia		None		Never		I never had Covid-19		I never had Covid-19		No	No		Yes	Work,Pandemic,Finance,Childcare/ school closures		Engage in hobbies		Yes	Oxford-AstraZeneca		No	Tired,Headache,Pain in muscle/swelling		Less than a week	Yourself,Children,Family	Yes			Lockdown and observe R rate for longer,Tier response system,Social distancing,Mask wearing	No	Yes	Yes	Yes
50 to 60	Female		White British		Education/Academia		None		Never		I never had Covid-19		I never had Covid-19		No			Yes	Pandemic		Speak to family/ friends		Yes	Pfizer-BioNTech		Yes	Other	slight soreness to injection site	Less than a week	Children,Family	Yes			Social distancing,Mask wearing	No	Yes	Yes	Yes
41 to 50	Female		White British		Education/Academia		None		Never		I never had Covid-19		I never had Covid-19		No			Yes	Covid-19,Work,Childcare/ school closures		Excessive use of social media		Yes	Oxford-AstraZeneca		No	Tired,Pain in muscle/swelling		Less than a week	Yourself,Family	Yes			Social distancing,Mask wearing	Yes	Yes	Yes	Yes
41 to 50	Female		White British		Education/Academia		None		Never		I never had Covid-19		I never had Covid-19		No	No		No			I don't feel any stress due to Covid-19		Yes	Oxford-AstraZeneca		No	Tired,Strange feeling,Fever,Aches/chills,Pain in muscle/swelling,Nausea,Enlarged lymph nodes,Bell’s palsy		Less than a week	Yourself,Children,Family	Yes			Lockdown and observe R rate for longer,Tier response system,Social distancing,Mask wearing	No	Yes	Yes	Yes
60 to 70	Female		Asian/Asian British/Arabic		Education/Academia		None		Never		I never had Covid-19		I never had Covid-19		No			No			I don't feel any stress due to Covid-19		Yes	Oxford-AstraZeneca		No	Strange feeling,Headache		Less than a week	Family	Yes			Tier response system	No	Yes	No	No
41 to 50	Female		White British		Education/Academia		None		Never		I never had Covid-19		I never had Covid-19		No			Yes	Work,Childcare/ school closures		Watch movies/TV shows etc.,Speak to family/ friends		Yes	Pfizer-BioNTech		Yes	Pain in muscle/swelling		Less than a week	Yourself,Children,Family	Yes			No restrictions	Yes	Yes	Yes	Yes
41 to 50	Female		White British		Education/Academia		Other	Bipolar Disorder	Never		I never had Covid-19		I never had Covid-19		No	No		Yes	Work,Relationships,Childcare/ school closures		Watch movies/TV shows etc.,Excessive use of social media,Speak to family/ friends		Yes	Pfizer-BioNTech		Yes	Tired,Fever,Aches/chills		Less than a week	Yourself,Family	Yes			Social distancing,Mask wearing	Yes	Yes	Yes	Yes
31 to 40	Female		White British		Education/Academia		None		Never		I never had Covid-19		I never had Covid-19		No			Yes	Work		Sports/Games,Speak to family/ friends		Yes	Oxford-AstraZeneca		No	Headache,Fever		Less than a week	Yourself,Children,Family	Yes			Social distancing,Mask wearing	No	Yes	No	No
41 to 50	Female		Asian/Asian British/Arabic		Education/Academia		None		Never		I never had Covid-19		I never had Covid-19		No			Yes	Covid-19,Pandemic,Other	The (necessary) restrictions of lockdown	Engage in hobbies		Yes	Oxford-AstraZeneca		Yes	Tired,Strange feeling,Headache,Fever,Aches/chills		Less than a week	Yourself,Children,Family	Yes			Lockdown and observe R rate for longer,Social distancing,Mask wearing	Yes	Yes	Yes	Yes
41 to 50	Female		White British		Education/Academia		None		Never		I never had Covid-19		I never had Covid-19		No			Yes	Covid-19,Work,Pandemic,Childcare/ school closures		Sports/Games		Yes	Oxford-AstraZeneca		No	Headache,Aches/chills		Less than a week	Yourself,Children,Family	Yes			Tier response system	Yes	Yes	Yes	Yes
Over 70	Female		White British		Other	Retired	None		Never		I never had Covid-19		I never had Covid-19		No			Yes	Pandemic,Relationships		Engage in hobbies		Yes	Pfizer-BioNTech		Yes	None		Less than a week	Family	Yes			Social distancing,Mask wearing	Yes	Yes	Yes	Yes
60 to 70	Female		White British		Education/Academia		Obesity		Never		I never had Covid-19		I never had Covid-19		No			Yes	Covid-19		Engage in hobbies		Yes	Pfizer-BioNTech		No	Tired,Headache,Pain in muscle/swelling,Dizziness		Less than a week	Yourself,Family	Yes			Mask wearing	No	Yes	Yes	Yes
50 to 60	Female		White British		Education/Academia		None		Never		I never had Covid-19		I never had Covid-19		No			Yes	Work		Watch movies/TV shows etc.		Yes	Oxford-AstraZeneca		Yes	Headache		Less than a week	Yourself,Family	Yes			Social distancing,Mask wearing	Yes	Yes	Yes	Yes
60 to 70	Female		White British		Other	Retired	Other	Anti oestrogen /breast cancer treatment	Never		I never had Covid-19		I never had Covid-19		No			Yes	Other	Poor government response & destruction of much of my social life	Excessive use of social media,Sports/Games,Engage in hobbies,Other	Reading	Yes	Pfizer-BioNTech		No	Headache		Less than a week	Yourself,Family	Yes			Lockdown and observe R rate for longer,Social distancing,Mask wearing	Yes	Yes	Yes	Yes
60 to 70	Female		White British		Finance services/Banking/Insurance		None		Never		I never had Covid-19		I never had Covid-19		No	No		No			Engage in hobbies		Yes	Oxford-AstraZeneca		No	Itchy skin/rash		Less than a week	Yourself,Children,Family	Yes			Social distancing,Mask wearing	No	Yes	No	No
Over 70	Male		White British		Education/Academia		A severe lung condition (such as cystic fibrosis, severe asthma or severe COPD)		Never		I never had Covid-19		I never had Covid-19		No			Yes	Pandemic		Speak to family/ friends		Yes	Oxford-AstraZeneca		Yes	Tired		Less than a week	Yourself,Children,Family	Yes			Social distancing,Mask wearing	No	Yes	Yes	Yes
50 to 60	Female		White British		Education/Academia		None		Never		I never had Covid-19		I never had Covid-19		No			Yes	Work,Relationships		Watch movies/TV shows etc.,Sports/Games,Speak to family/ friends		Yes	Oxford-AstraZeneca		Yes	Fever		Less than a week	Yourself,Children,Family	No			Lockdown and observe R rate for longer,Tier response system,Social distancing,Mask wearing	Yes	Yes	Yes	Yes
50 to 60	Female		White British		Education/Academia		Obesity		Never		I never had Covid-19		I never had Covid-19		No			Yes			Watch movies/TV shows etc.,Excessive use of social media,Speak to family/ friends		Yes	Oxford-AstraZeneca		No	Tired,Headache,Fever,Aches/chills,Pain in muscle/swelling,Nausea,Dizziness		Less than a week	Yourself,Children,Family	Yes			Tier response system,Social distancing,Mask wearing	Yes	Yes	Yes	Yes
41 to 50	Female		White British		Education/Academia		None		Never		I never had Covid-19		I never had Covid-19		No			Yes	Work,Pandemic		Watch movies/TV shows etc.,Speak to family/ friends,Engage in hobbies		Yes	Pfizer-BioNTech		Yes	Tired,Aches/chills,Pain in muscle/swelling		Less than a week	Yourself,Children,Family	Yes			Social distancing,Mask wearing	Yes	Yes	Yes	Yes
50 to 60	Male		White British		Education/Academia		None		Sept 2020 to December 2020		Symptoms managed at home		Up to 7 days		No	No		No			I don't feel any stress due to Covid-19		Yes	Oxford-AstraZeneca		No	Headache,Fever,Aches/chills		Less than a week	Yourself,Children,Family	Yes			No restrictions	Yes	Yes	Yes	Yes
41 to 50	Male		White British		Education/Academia		None		Never		I never had Covid-19		I never had Covid-19		No	No		No			I don't feel any stress due to Covid-19		Yes	Oxford-AstraZeneca		No	None		Less than a week	Yourself,Children,Family	Yes			Social distancing	No	Yes	No	No
31 to 40	Male		White British		Education/Academia		None		Never		I never had Covid-19		I never had Covid-19		No			Yes	Covid-19,Work,Childcare/ school closures		Engage in hobbies,Other	Often nothing but get on with what I have to do. Stress is caused by lack of time between work, preparing new online course and home schooling at the same time, so there is no time much time to do other things despite the stress.	Yes	None						Yourself,Children,Family	Yes			Tier response system,Social distancing,Mask wearing	No	Yes	Yes	No
50 to 60	Female		White British		Education/Academia		None		Never		I never had Covid-19		I never had Covid-19		No	No		No			I don't feel any stress due to Covid-19		Yes	Oxford-AstraZeneca		Yes	Tired,Pain in muscle/swelling		Less than a week	Don’t know	No	Side effects,Needle-phobia		Tier response system	No	Yes	No	No
60 to 70	Female		White British		Medical (e.g. NHS, Pharmacy)		None		Never		I never had Covid-19		I never had Covid-19		No	No		No			Speak to family/ friends,Engage in hobbies		Yes	Oxford-AstraZeneca		Yes	Pain in muscle/swelling		Over 2 weeks	Yourself,Family	Yes			Social distancing,Mask wearing	No	Yes	Yes	No
50 to 60	Female		White British		Education/Academia		None		Never		I never had Covid-19		I never had Covid-19		No	No		Yes	Covid-19,Work,Childcare/ school closures		Speak to family/ friends		Yes	Oxford-AstraZeneca		Yes	Headache,Pain in muscle/swelling		Less than a week	Yourself,Children,Family	Yes			Tier response system,Social distancing	Yes	Yes	No	No
60 to 70	Female		White British		Other	Leadership Consultant & Executive Coach	Obesity		Never		I never had Covid-19		I never had Covid-19		No	No		No			Other	meditation and yoga	Yes	Oxford-AstraZeneca		No	Tired,Headache,Pain in muscle/swelling		Less than a week	Yourself,Children,Family	Yes			No restrictions	No	Yes	No	Yes
50 to 60	Female		White British		Education/Academia		None		Never		I never had Covid-19		I never had Covid-19		No			No			I don't feel any stress due to Covid-19		Yes	Oxford-AstraZeneca		No	Tired,Headache		Over 2 weeks	Yourself,Family	Yes			Social distancing,Mask wearing	No	Yes	Yes	Yes
41 to 50	Female		White British		Education/Academia		None		Never		I never had Covid-19		I never had Covid-19		No			No			I don't feel any stress due to Covid-19		Yes	Oxford-AstraZeneca		Yes	Aches/chills,Pain in muscle/swelling		Less than a week	Yourself,Children,Family	Yes			Tier response system,Social distancing,Mask wearing	No	Yes	No	Yes
Over 70	Male		White British		Self employed		Obesity		Never		I never had Covid-19		I never had Covid-19		No	No		No			I don't feel any stress due to Covid-19		Yes	Oxford-AstraZeneca		No	Tired,Headache		Less than a week	Yourself,Children,Family	Yes			Tier response system	No	Yes	No	Yes
60 to 70	Female		White British		Education/Academia		None		Never		I never had Covid-19		I never had Covid-19		No	No		No			I don't feel any stress due to Covid-19		Yes	Pfizer-BioNTech		Yes	None		Less than a week	Yourself,Family	Yes			No restrictions	No	Yes	No	Yes
60 to 70	Female		White British		Education/Academia		Other	Myasthenia gravis (autoimmune)	Never		I never had Covid-19		I never had Covid-19		No			Yes	Work,Pandemic,Relationships		Watch movies/TV shows etc.,Speak to family/ friends,Engage in hobbies,Other	Pray	Yes	Oxford-AstraZeneca		No	Tired,Aches/chills,Pain in muscle/swelling		Less than a week	Yourself,Children,Family	No	Other	It is beleived that my MG relapses in response to immune sysem challenges so i have been advised not to have the flu vaccine. However I hoped not to relapse due to the vaccine and was lucky. Also I am aware that the vaccine is less protective to people like myself who are immunocompromised, still it is better than nothing!	Tier response system,Social distancing,Mask wearing	Yes	Yes	Yes	Yes
50 to 60	Female		White British		Education/Academia		None		Never		I never had Covid-19		I never had Covid-19		No			Yes	Work		Watch movies/TV shows etc.,Excessive use of social media,Sports/Games,Engage in hobbies		Yes	Oxford-AstraZeneca		Yes	Fever,Aches/chills		Less than a week	Yourself,Family	Yes			No restrictions	No	Yes	Yes	Yes
50 to 60	Female		White British		Education/Academia		Diabetes,Other	Hyperactive thyroid	Never		I never had Covid-19		I never had Covid-19		No			Yes	Covid-19,Work,Other	Using public transport	Speak to family/ friends		Yes	Oxford-AstraZeneca		Yes	Tired,Allergic reactions		Less than a week	Yourself,Family	Yes			Lockdown and observe R rate for longer,Social distancing,Mask wearing	No	Yes	No	No
21 to 30	Male		White British		Education/Academia		None		Never		I never had Covid-19		I never had Covid-19		No	No		Yes	Covid-19,Work		Watch movies/TV shows etc.,Excessive use of social media,Sports/Games		Yes	None						Yourself,Family	Yes			Social distancing	Yes	Yes	Yes	Yes
31 to 40	Male		White British		Education/Academia		Obesity		Never		I never had Covid-19		I never had Covid-19		No			Yes	Work,Pandemic,Childcare/ school closures		Watch movies/TV shows etc.,Engage in hobbies		Yes	None						Yourself,Children,Family	Yes			Tier response system,Social distancing,Mask wearing	No	Yes	No	Yes
31 to 40	Female		White British		Education/Academia		None		Never		I never had Covid-19		I never had Covid-19		No			Yes	Covid-19,Pandemic,Childcare/ school closures		Engage in hobbies,Other	Concentrate on something I control e.g. being a mum	Yes	None						Yourself,Children,Family	Yes			Tier response system,Mask wearing	No	Yes	Yes	Yes
31 to 40	Male		White British		Education/Academia		None		Never		I never had Covid-19		I never had Covid-19		No			Yes	Relationships		Engage in hobbies		Yes	None						Family	Yes			Lockdown and observe R rate for longer	Yes	Yes	Yes	Yes
21 to 30	Male		White British		Education/Academia		None		Never		I never had Covid-19		I never had Covid-19		No	No		Yes	Work,Pandemic,Studies/Performance		Watch movies/TV shows etc.,Sports/Games,Speak to family/ friends,Engage in hobbies		Yes	Oxford-AstraZeneca		Yes	Tired,Headache		Less than a week	Yourself,Children,Family	Yes			Tier response system	Yes	Yes	Yes	Yes
31 to 40	Female		White British		Education/Academia		None		Never		I never had Covid-19		I never had Covid-19		No			Yes	Work,Pandemic,Studies/Performance,Relationships,Other	not seeing family	Watch movies/TV shows etc.,Excessive use of social media,Sports/Games,Speak to family/ friends		Yes	Oxford-AstraZeneca		Yes	Tired,Aches/chills,Pain in muscle/swelling		Less than a week	Yourself,Children,Family	Yes			Social distancing,Mask wearing	Yes	Yes	Yes	Yes
31 to 40	Male		Asian/Asian British/Arabic		Education/Academia		None		Never		I never had Covid-19		I never had Covid-19		No	No		Yes	Pandemic		Watch movies/TV shows etc.		Yes	Oxford-AstraZeneca		Yes	None		Less than a week	Yourself,Family	Yes			No restrictions	Yes	Yes	Yes	Yes
41 to 50	Male		White British		Education/Academia		None		Never		I never had Covid-19		I never had Covid-19		No	No		Yes	Childcare/ school closures		Sports/Games		Yes	None						Yourself,Children,Family	Yes			Mask wearing,No restrictions	No	Yes	No	Yes
31 to 40	Male		Asian/Asian British/Arabic		Construction/Building		None		Never		I never had Covid-19		I never had Covid-19		No			Yes	Vaccine,Work,Studies/Performance,Finance,Relationships,Childcare/ school closures		Speak to family/ friends		Yes	None		Yes	None			Yourself,Family	Yes			Mask wearing	Yes	Yes	Yes	Yes
50 to 60	Female		White British		Education/Academia		None		Never		I never had Covid-19		I never had Covid-19		No	No		Yes	Covid-19,Work		Engage in hobbies		Yes	Oxford-AstraZeneca		Yes	None		Less than a week	Yourself,Family	Yes			Mask wearing	Yes	Yes	Yes	Yes
50 to 60	Male		White European		Education/Academia		None		Never		I never had Covid-19		I never had Covid-19		No	No		Yes	Covid-19,Work,Pandemic		Excessive use of social media,Speak to family/ friends		Yes	Oxford-AstraZeneca		No	Headache,Fever,Aches/chills		Less than a week	Yourself,Children,Family	Yes			Tier response system	No	Yes	Yes	Yes
31 to 40	Female		White European		Education/Academia		None		Never		I never had Covid-19		I never had Covid-19		No			Yes	Covid-19,Work,Relationships		Watch movies/TV shows etc.,Sports/Games,Engage in hobbies		Yes	None						Yourself,Children,Family	Yes			Tier response system,Social distancing,Mask wearing	Yes	Yes	Yes	Yes
31 to 40	Male		Asian/Asian British/Arabic		Education/Academia		Diabetes		Never		I never had Covid-19		I never had Covid-19		No	No		No			I don't feel any stress due to Covid-19		Yes	Oxford-AstraZeneca		Yes	Tired,Strange feeling,Headache,Fever,Aches/chills,Pain in muscle/swelling,Enlarged lymph nodes		Less than a week	Yourself,Children,Family	Yes			Lockdown and observe R rate for longer,Social distancing,Mask wearing	Yes	Yes	Yes	Yes
21 to 30	Male		White British		Education/Academia		None		Never		I never had Covid-19		I never had Covid-19		No	No		No	Pandemic,Studies/Performance		Watch movies/TV shows etc.,Engage in hobbies		Yes	Pfizer-BioNTech		No	Tired,Headache,Fever,Nausea,Dizziness		Less than a week	Yourself,Children,Family	Yes			Tier response system,Social distancing,Mask wearing	Yes	Yes	No	Yes
21 to 30	Female		White British		Education/Academia		None		Never		Symptoms managed at home		Up to 7 days		No		Reduction in fitness,Negative impact on mental health	Yes	Covid-19,Work,Pandemic		Watch movies/TV shows etc.,Excessive use of social media		Yes	None						Family	Yes			Social distancing,Mask wearing	Yes	Yes	Yes	Yes
31 to 40	Male		Asian/Asian British/Arabic		Education/Academia		None		Never		I never had Covid-19		I never had Covid-19		No			No			I don't feel any stress due to Covid-19		Yes	None						Yourself,Children,Family	Yes			Social distancing	Yes	Yes	Yes	Yes
41 to 50	Male		White European		Education/Academia		None		Never		I never had Covid-19		I never had Covid-19		No	No		No			Watch movies/TV shows etc.,Sports/Games,Speak to family/ friends,Engage in hobbies		Yes	Pfizer-BioNTech		No	None		Less than a week	Yourself,Children,Family	Yes			No restrictions	Yes	Yes	No	Yes
31 to 40	Male		White European		Education/Academia		None		Never		I never had Covid-19		I never had Covid-19		No			Yes	Pandemic		Other	Work too much	Yes	None						Yourself,Children,Family	Yes			Tier response system,Social distancing	No	Yes	Yes	No
60 to 70	Female		White British		Education/Academia		None		Never		I never had Covid-19		I never had Covid-19		No	No		No			Speak to family/ friends		Yes	Oxford-AstraZeneca		No	None		Less than a week	Yourself	Yes			Tier response system,Social distancing,Mask wearing	Yes	Yes	Yes	Yes
31 to 40	Male		White British		Education/Academia		None		Never		I never had Covid-19		I never had Covid-19		No	No		Yes	Work,Pandemic,Studies/Performance		Watch movies/TV shows etc.,Excessive use of social media,Sports/Games,Speak to family/ friends		Yes	Other	Sinopharm	Yes	Pain in muscle/swelling		Less than a week	Yourself,Children,Family	Yes			Lockdown and observe R rate for longer,Tier response system,Social distancing,Mask wearing	Yes	Yes	Yes	Yes
41 to 50	Male		Asian/Asian British/Arabic		Other	Oil and Gas Industry	None		Never		I never had Covid-19		I never had Covid-19		No	No		Yes	Studies/Performance		Watch movies/TV shows etc.,Excessive use of social media,Speak to family/ friends,Engage in hobbies		Yes	Oxford-AstraZeneca		Yes	Aches/chills		Less than a week	Family	No	Side effects		Social distancing,Mask wearing	Yes	Yes	Yes	Yes
41 to 50	Male		White European		Education/Academia		Obesity		Sept 2020 to December 2020		Symptoms requiring GP appointment/ 111 advice		Up to 14 days		Yes	No	Reduction in fitness,Negative impact on mental health,Negative impact on relationships	Yes	Other	Really, really quite disturbing dreams whilst asleep, that could still be remembered vividly upon waking. Also, an inability to eat many foods as they tasted significantly different to expected (perhaps there could be something in that that could be used in weight loss programmes as I lost quite a bit of weight that I simply wasn't able to previously.	Watch movies/TV shows etc.,Speak to family/ friends,Engage in hobbies		Yes	None						None	No	Other	Two fold really. First, I expect that having had covid will provide me with an element of resistance to the current variants in the UK. Second, I feel that the clamouring of multinational pharmaceutical companies after big profits along with the speed at which the vaccine was rolled out make it unlikely that established quality mechanisms were adhered to in the development and production of the v…	No restrictions	No	Yes	No	No
31 to 40	Female		White British		Other	marketing	None		Never		I never had Covid-19		I never had Covid-19		No			Yes	Pandemic,Childcare/ school closures		Watch movies/TV shows etc.,Speak to family/ friends,Other	go for a walk/run	Yes	None						Yourself,Children,Family	Yes			Social distancing,Mask wearing	Yes	Yes	Yes	Yes
41 to 50	Male		White British		Education/Academia		None		Never		I never had Covid-19		I never had Covid-19		No			No			Watch movies/TV shows etc.,Sports/Games,Other	DIY	Yes	None						Yourself,Children,Family	Yes			No restrictions	No	Yes	No	No
41 to 50	Female		White British		Education/Academia		Obesity,Other	Asthma	Never		I never had Covid-19		I never had Covid-19		No			No			Watch movies/TV shows etc.,Excessive use of social media,Engage in hobbies,I don't feel any stress due to Covid-19		Yes	Oxford-AstraZeneca		No	Headache,Aches/chills		Less than a week	Yourself,Family	Yes			Lockdown and observe R rate for longer,Tier response system,Social distancing,Mask wearing	Yes	Yes	Yes	Yes
41 to 50	Male		White British		Education/Academia		None		Never		I never had Covid-19		I never had Covid-19		No	No		Yes	Other	Looking after disabled parents who both contracted covid	Speak to family/ friends		Yes	Oxford-AstraZeneca		Yes	Tired,Headache,Aches/chills		Less than a week	Yourself,Children,Family	Yes			Mask wearing	Yes	Yes	Yes	Yes
50 to 60	Male		White British		Education/Academia		None		Never		I never had Covid-19		I never had Covid-19		No	No		No	Covid-19		Other	walking	Yes	Oxford-AstraZeneca		Yes	None		Less than a week	Yourself,Children,Family	Yes			Tier response system	Yes	Yes	Yes	Yes
50 to 60	Male		White British		Other	Information Technology	None		Never		I never had Covid-19		I never had Covid-19		No			No			I don't feel any stress due to Covid-19		Yes	Pfizer-BioNTech		Yes	None		Less than a week	Yourself,Children,Family	Yes			Social distancing	Yes	Yes	Yes	Yes
60 to 70	Male		White British		Education/Academia		None		Never		I never had Covid-19		I never had Covid-19		No			No			I don't feel any stress due to Covid-19		Yes	Oxford-AstraZeneca		No	Aches/chills		Less than a week	Yourself,Family	Yes			Lockdown and observe R rate for longer	Yes	Yes	Yes	Yes
21 to 30	Male		White European		Education/Academia		None		Never		I never had Covid-19		I never had Covid-19		No	No		Yes	Work,Pandemic		Engage in hobbies		Yes	None						Yourself,Family	Yes			Mask wearing,No restrictions	No	Yes	No	No
50 to 60	Male		White British		Education/Academia		None		Never		I never had Covid-19		I never had Covid-19		No	No		Yes	Covid-19,Finance,Relationships		Watch movies/TV shows etc.,Speak to family/ friends		Yes	Oxford-AstraZeneca		Yes	None		Less than a week	Yourself,Children,Family	Yes			Mask wearing	Yes	Yes	No	Yes
31 to 40	Male		White British		Education/Academia		None		Never		I never had Covid-19		I never had Covid-19		No	No		Yes	Covid-19		Speak to family/ friends		Yes	None						Don’t know	No	Side effects,Other	Effectiveness and information given to the public	Lockdown and observe R rate for longer,Social distancing,Mask wearing	Yes	Yes	Yes	Yes
21 to 30	Female		White European		Education/Academia		None		Never		I never had Covid-19		I never had Covid-19		No	No		Yes	Covid-19,Vaccine,Work,Pandemic,Studies/Performance,Finance,Relationships,Childcare/ school closures,Other	Traveling, immigrant issues	Watch movies/TV shows etc.,Excessive use of social media,Sports/Games,Speak to family/ friends,Engage in hobbies		Yes	None						Yourself,Children,Family	Yes			Mask wearing	Yes	Yes	Yes	Yes
50 to 60	Male		White British		Education/Academia		None		Never		I never had Covid-19		I never had Covid-19		No			Yes	Covid-19		Speak to family/ friends		Yes	Oxford-AstraZeneca		Yes	Other	Tenderness at injection site for 48hrs. I did have a slight headache the morning after the vaccination but there is a good chance that it was coincidental.	Less than a week	Yourself,Family	Yes			No restrictions	No	Yes	Yes	Yes
41 to 50	Male		White British		Education/Academia		None		Never		I never had Covid-19		I never had Covid-19		No			Yes	Work		Sports/Games,Speak to family/ friends,Engage in hobbies		Yes	Oxford-AstraZeneca		Yes	None		Less than a week	Yourself,Children,Family	Yes			Tier response system	Yes	Yes	No	Yes
31 to 40	Male		White British		Education/Academia		None		Never		I never had Covid-19		I never had Covid-19		No			No			Excessive use of social media,Sports/Games,Engage in hobbies		Yes	None						Yourself,Children,Family	Yes			Mask wearing,No restrictions	No	Yes	No	Yes
60 to 70	Female		White British		Education/Academia		On medicine that makes you much more likely to get infections (such as high doses of steroids or immunosuppressant medicine)		Never		I never had Covid-19		I never had Covid-19		No			Yes	Covid-19		Engage in hobbies		Yes	Pfizer-BioNTech		Yes	Tired,Pain in muscle/swelling		Less than a week	Yourself,Family	Yes			Social distancing,Mask wearing	No	Yes	Yes	Yes
21 to 30	Female		White British		Education/Academia		None		Never		I never had Covid-19		I never had Covid-19		No	No		Yes	Pandemic		Engage in hobbies		Yes	Pfizer-BioNTech		No	Pain in muscle/swelling		Less than a week	Yourself,Children,Family	Yes			Tier response system,Social distancing,Mask wearing	Yes	Yes	Yes	Yes
31 to 40	Female		White European		Education/Academia		None		January 2021 and onwards		Symptoms managed at home		Up to 7 days		No	No		Yes	Covid-19,Vaccine,Childcare/ school closures		Speak to family/ friends,Engage in hobbies		Yes	None						Don’t know	No	Side effects		No restrictions	Yes	Yes	No	Yes
31 to 40	Male		Black, African, Caribbean or Black British		Education/Academia		None		Never		I never had Covid-19		I never had Covid-19		No	No		No			I don't feel any stress due to Covid-19		Yes	None						Yourself	Yes			No restrictions	Yes	Yes	Yes	Yes
31 to 40	Female		Asian/Asian British/Arabic		Education/Academia		None		Never		I never had Covid-19		I never had Covid-19		No			Yes	Work,Studies/Performance		Other	Reading books	Yes	None						Don’t know	No	Side effects,History of allergy		Mask wearing	Yes	Yes	Yes	No
60 to 70	Male		White European		Education/Academia		None		Sept 2020 to December 2020		Symptoms managed at home		Up to 7 days		No	No	Reduction in fitness	Yes	Covid-19		Watch movies/TV shows etc.		Yes	Oxford-AstraZeneca		No	Headache,Fever,Aches/chills,Lost smell		Less than a week	Yourself,Children,Family	Yes			No restrictions	No	Yes	Yes	Yes
21 to 30	Male		White British		Education/Academia		None		Sept 2020 to December 2020		Asymptomatic		Up to 3 days		No	No	Negative impact on mental health	Yes	Other	Being forced to serve my time self isolating	Other	Avoid the news and noise and hysteria	Yes	None						Yourself	Yes			No restrictions	Yes	Yes	No	No
31 to 40	Male		White British		Education/Academia		Obesity		Never		I never had Covid-19		I never had Covid-19		No	No		No			I don't feel any stress due to Covid-19		Yes	Oxford-AstraZeneca		No	Tired,Headache,Aches/chills,Pain in muscle/swelling		Less than a week	Yourself,Children,Family	Yes			No restrictions	Yes	Yes	No	Yes
41 to 50	Female		White British		Education/Academia		None		Never		I never had Covid-19		I never had Covid-19		No			Yes	Work,Childcare/ school closures,Other	Not being able to see family members	Engage in hobbies		Yes	Oxford-AstraZeneca		No	Fever		Less than a week	Yourself,Children,Family	Yes			Tier response system,Social distancing,Mask wearing	Yes	Yes	Yes	Yes
21 to 30	Female		White European		Other	Civil Service	Other	Mild Asthma	Jan 2020 to April 2020		Symptoms managed at home		Up to 3 days		No		Reduction in fitness	Yes	Finance,Childcare/ school closures		Speak to family/ friends		Yes	None						None	No	Side effects,Other	I am currently breastfeeding my daughter and I don't think there's been enough information regarding the passing of side effects through breast milk	No restrictions	No	Yes	No	Yes
21 to 30	Female		White British		Education/Academia		Diabetes		Never		I never had Covid-19		I never had Covid-19		No		Negative impact on mental health	Yes	Work,Pandemic,Studies/Performance		Engage in hobbies		Yes	Oxford-AstraZeneca		No	Tired,Headache,Nausea,Dizziness		Less than a week	Yourself,Children,Family	Yes			Lockdown and observe R rate for longer,Tier response system,Social distancing,Mask wearing	Yes	Yes	Yes	Yes
50 to 60	Male		Asian/Asian British/Arabic		Education/Academia		None		Never		I never had Covid-19		I never had Covid-19		No			Yes	Covid-19,Pandemic		Sports/Games		Yes	Oxford-AstraZeneca		Yes	None		Less than a week	Yourself,Family	Yes			Tier response system,Social distancing,Mask wearing	No	Yes	Yes	Yes
31 to 40	Male		White British		Education/Academia		None		Never		Symptoms managed at home		Longer than 14 days		Yes	No	Reduction in fitness,Negative impact on mental health	Yes	Covid-19,Work,Pandemic,Relationships		Watch movies/TV shows etc.,Speak to family/ friends,Engage in hobbies		Yes	Oxford-AstraZeneca		Yes	Tired,Headache,Aches/chills,Pain in muscle/swelling		Less than a week	Yourself,Children,Family	Yes			Lockdown and observe R rate for longer,Tier response system,Social distancing,Mask wearing	Yes	Yes	Yes	Yes
41 to 50	Male		Asian/Asian British/Arabic		Medical (e.g. NHS, Pharmacy)		None		January 2021 and onwards		Symptoms requiring GP appointment/ 111 advice		Up to 14 days		No	No	Sick leave extending longer than self-isolation period	No			Engage in hobbies		Yes	Oxford-AstraZeneca		Yes	Headache,Aches/chills		Less than a week	Yourself,Children,Family	Yes			No restrictions	Yes	Yes	No	Yes
50 to 60	Male		White European		Education/Academia		None		Never		Symptoms managed at home		Up to 14 days		No		Reduction in fitness	No			I don't feel any stress due to Covid-19		Yes	Oxford-AstraZeneca		No	Pain in muscle/swelling		Less than 2 weeks	Yourself,Children,Family	Yes			Mask wearing	No	Yes	No	No
31 to 40	Male		Other	Hispanic	Education/Academia		None		Never		I never had Covid-19		I never had Covid-19		No			Yes	Covid-19,Pandemic,Relationships		Watch movies/TV shows etc.,Sports/Games,Engage in hobbies		Yes	Oxford-AstraZeneca		Yes	Pain in muscle/swelling		Less than a week	Yourself,Family	Yes			Social distancing,Mask wearing	Yes	Yes	Yes	Yes
31 to 40	Female		White British		Medical (e.g. NHS, Pharmacy)		None		Never		I never had Covid-19		I never had Covid-19		No	No		Yes	Covid-19,Vaccine,Work,Pandemic		Sports/Games,Speak to family/ friends,Engage in hobbies		Yes	Oxford-AstraZeneca		No	Pain in muscle/swelling,Nausea		Less than a week	Yourself,Family	Yes			Social distancing,Mask wearing	Yes	Yes	Yes	Yes
31 to 40	Male		White European		Education/Academia		None		Never		I never had Covid-19		I never had Covid-19		No	No		Yes	Work,Studies/Performance,Relationships,Childcare/ school closures		Watch movies/TV shows etc.,Speak to family/ friends		Yes	Pfizer-BioNTech		No	None		Less than a week	Yourself,Children,Family	Yes			No restrictions	Yes	Yes	Yes	Yes
21 to 30	Female		White British		Education/Academia		None		Never		I never had Covid-19		I never had Covid-19		No	No		Yes	Studies/Performance		Engage in hobbies		Yes	Oxford-AstraZeneca		No	Tired,Headache,Fever,Aches/chills,Pain in muscle/swelling,Nausea,Dizziness		Over 2 weeks	Yourself,Children,Family	Yes			Tier response system	Yes	Yes	Yes	Yes
41 to 50	Male		White British		Education/Academia		None		Never		I never had Covid-19		I never had Covid-19		No			No			I don't feel any stress due to Covid-19		Yes	Oxford-AstraZeneca		Yes	Tired,Aches/chills		Less than a week	Yourself,Children,Family	Yes			No restrictions	Yes	Yes	No	Yes
21 to 30	Male		White European		Education/Academia		Obesity		Never		I never had Covid-19		I never had Covid-19		No	No		Yes	Covid-19,Work,Studies/Performance,Relationships		Watch movies/TV shows etc.,Engage in hobbies		Yes	Pfizer-BioNTech		Yes				Family	Yes			Tier response system,Social distancing,Mask wearing	Yes	Yes	Yes	Yes
41 to 50	Male		Asian/Asian British/Arabic		Education/Academia		None		Never		I never had Covid-19		I never had Covid-19		No			Yes	Vaccine,Work,Studies/Performance,Relationships		I don't feel any stress due to Covid-19		Yes	Oxford-AstraZeneca		No	Strange feeling,Headache,Fever,Dizziness		Less than a week	Yourself,Children,Family	Yes			Tier response system	No	Yes	Yes	Yes
50 to 60	Male		White British		Education/Academia		None		Never		I never had Covid-19		I never had Covid-19		No			No			Other	Drink beer	Yes	Pfizer-BioNTech		No	Tired,Aches/chills		Less than a week	Yourself	Yes			No restrictions	Yes	Yes	No	No
21 to 30	Male		White British		Education/Academia		None		Never			Tests weren't available in march last year but i had almost every symptom. was bedbound for close to two weeks and struggled with basic tasks such as showering (had to sit on the floor to shower myself, couldn't stand up without being out of breath for more than a few minutes)	Up to 14 days		No	No	Reduction in fitness	Yes	Other	Constant alteration to average life such as having to wear masks everywhere, unable to enter a shop on a whim if you forget something, the suggestions currently circulating around not being able to travel without being forced to take a vaccine.	Sports/Games		Yes	None			Tired,Strange feeling,Headache,Fever,Aches/chills,Pain in muscle/swelling,Nausea,Dizziness		Less than 2 weeks	None	No	Personal beliefs		No restrictions	Yes	No	Yes	No
60 to 70	Female		White British		Education/Academia		Other	ME Coeliac Disease Hypertension	Never		I never had Covid-19		I never had Covid-19		No			Yes	Work,Other	the public information circulated- very poor leadership from the Government and others (media)	Watch movies/TV shows etc.		Yes	None						Don’t know	No	Other	need it to be researched more for ME - not a consensus.	Tier response system	No	Yes	No	No
41 to 50	Male		White European		Education/Academia		None		Never		I never had Covid-19		I never had Covid-19		No	No		Yes	Covid-19,Work,Pandemic,Studies/Performance,Relationships		Speak to family/ friends,Engage in hobbies		Yes	None						Children,Family	No	Side effects,Other	Not effective against the virus	Social distancing,Mask wearing	No	Yes	Yes	Yes
31 to 40	Male		Asian/Asian British/Arabic		Education/Academia		None		Never		I never had Covid-19		I never had Covid-19		No			Yes	Covid-19,Work,Studies/Performance,Finance,Childcare/ school closures		Excessive use of social media,Speak to family/ friends		Yes	None						Yourself,Children,Family	Yes			Tier response system,Social distancing	Yes	Yes	No	No
31 to 40	Male		White European		Education/Academia		None		Never		I never had Covid-19		I never had Covid-19		No			Yes	Pandemic		Speak to family/ friends		Yes	Oxford-AstraZeneca		Yes	None		Less than a week	Yourself,Children,Family	Yes			Mask wearing	Yes	Yes	No	Yes
21 to 30	Female		White European		Law		None		Jan 2020 to April 2020		Symptoms requiring GP appointment/ 111 advice		Longer than 14 days		Yes	Yes	Development of other illnesses,Reduction in fitness,Negative impact on mental health	Yes	Studies/Performance		Watch movies/TV shows etc.,Excessive use of social media		Yes	Oxford-AstraZeneca		Yes	Tired,Headache,Fever,Aches/chills,Pain in muscle/swelling,Nausea,Dizziness,Other	Diarrhoea, stomachache	Over 2 weeks	Yourself,Children,Family	Yes			No restrictions	Yes	Yes	Yes	No
41 to 50	Male		Asian/Asian British/Arabic		Education/Academia		None		Never		Symptoms requiring GP appointment/ 111 advice		I never had Covid-19		No			No			Watch movies/TV shows etc.,Excessive use of social media,Sports/Games,Speak to family/ friends,Engage in hobbies		Yes	Oxford-AstraZeneca		No	Pain in muscle/swelling		Less than a week	Yourself,Children,Family	Yes			Tier response system,Social distancing,Mask wearing	Yes	Yes	No	Yes
21 to 30	Female		White British		Finance services/Banking/Insurance		None		Never		I never had Covid-19		I never had Covid-19		No	No		No			I don't feel any stress due to Covid-19		Yes	Oxford-AstraZeneca		Yes	Headache,Fever,Aches/chills,Pain in muscle/swelling		Less than a week	Yourself,Family	Yes			Social distancing	Yes	Yes	Yes	Yes
31 to 40	Male		White British		Other	Retired	None		Never		I never had Covid-19		I never had Covid-19		No			Yes	Other	Uk government bad management	Sports/Games,Engage in hobbies		Yes	Pfizer-BioNTech		No	Aches/chills		Less than a week	Yourself,Children,Family	Yes			No restrictions	No	No	No	No
31 to 40	Female		White British		Medical (e.g. NHS, Pharmacy)		None		Never		I never had Covid-19		I never had Covid-19		No	No		Yes	Work		Speak to family/ friends		Yes	Pfizer-BioNTech		Yes	Tired,Aches/chills		Less than a week	Yourself,Children,Family	Yes	Other	None	Social distancing,Mask wearing	Yes	Yes	Yes	No
Over 70	Female		White British		Other	Retired	Chemotherapy or antibody treatment for cancer, including immunotherapy,Blood or bone marrow cancer (such as leukaemia, lymphoma or myeloma)		Never		I never had Covid-19		I never had Covid-19		No			Yes	Covid-19		Speak to family/ friends,Other	Walking gardening	Yes	Oxford-AstraZeneca		Yes	Pain in muscle/swelling		Less than a week	Yourself,Children,Family	Yes			Tier response system	No	Yes	Yes	No
Over 70	Male		White British		Other	Retired	None		Never		I never had Covid-19		I never had Covid-19		No			No			I don't feel any stress due to Covid-19		Yes	Pfizer-BioNTech		No	Pain in muscle/swelling		Less than a week	Children,Family	Yes			No restrictions	Yes	Yes	Yes	Yes
60 to 70	Male		White British		Other	Non -Executive Director	None		Never		I never had Covid-19		I never had Covid-19		No			No			I don't feel any stress due to Covid-19		Yes	Oxford-AstraZeneca		Yes	None		Less than a week	Yourself,Family	Yes			Tier response system,Social distancing,Mask wearing	No	Yes	No	Yes
41 to 50	Female		White British		Education/Academia		None		Never		I never had Covid-19		I never had Covid-19		No	No		Yes	Covid-19,Pandemic,Relationships		Watch movies/TV shows etc.,Excessive use of social media,Speak to family/ friends,Other	Increased alcohol intake	Yes	Oxford-AstraZeneca		Yes	Tired,Pain in muscle/swelling		Less than a week	Yourself,Children,Family	Yes			No restrictions	Yes	Yes	No	Yes
60 to 70	Male		White British		Education/Academia		Diabetes,Obesity		Never		I never had Covid-19		I never had Covid-19		No			No			Other	Feel sleepy comfort eat	Yes	Oxford-AstraZeneca		No	Tired,Pain in muscle/swelling		Less than a week	Yourself,Children,Family	Yes			Social distancing,Mask wearing	Yes	Yes	Yes	Yes
50 to 60	Male		Other	Arabic	Education/Academia		None		Never		I never had Covid-19		I never had Covid-19		No			Yes	Work,Pandemic		Engage in hobbies		Yes	Oxford-AstraZeneca		Yes	Tired,Strange feeling,Headache,Fever,Aches/chills,Pain in muscle/swelling		Less than a week	Yourself,Children,Family	Yes			Social distancing,Mask wearing	No	Yes	No	No
Over 70	Female		White British		Other	Retired	None		Never		I never had Covid-19		I never had Covid-19		No	No		Yes	Covid-19		Speak to family/ friends,Other	Gardening	Yes	Pfizer-BioNTech		Yes	None		Less than a week	Yourself,Family	Yes			Mask wearing	Yes	Yes	Yes	Yes
41 to 50	Male		Asian/Asian British/Arabic		Finance services/Banking/Insurance		None		Sept 2020 to December 2020		Symptoms managed at home		Up to 3 days		No	No	Sick leave extending longer than self-isolation period	No			Other	Pray	Yes	None						Yourself,Children,Family	No	Side effects,History of allergy		Lockdown and observe R rate for longer,Tier response system,Social distancing,Mask wearing	No	Yes	Yes	No
41 to 50	Female		Asian/Asian British/Arabic		Charities		None		Never		I never had Covid-19		I never had Covid-19		No			No	Work		I don't feel any stress due to Covid-19		Yes	None						Don’t know	No	Side effects,Personal beliefs		No restrictions	No	Yes	No	No
31 to 40	Male		Asian/Asian British/Arabic		Other	Engineering Research	None		Sept 2020 to December 2020		Symptoms managed at home		Up to 3 days		Yes	No	Reduction in fitness	No			I don't feel any stress due to Covid-19		Yes	None						Family	Yes			Social distancing,Mask wearing	Yes	Yes	No	No
41 to 50	Male		Asian/Asian British/Arabic		Construction/Building		None		Sept 2020 to December 2020		Symptoms managed at home		Up to 3 days		No	No	Development of other illnesses,Reduction in fitness	Yes	Childcare/ school closures		Watch movies/TV shows etc.		Yes	Oxford-AstraZeneca		No	None		Less than a week	Yourself,Children,Family	Yes			Tier response system	Yes	Yes	Yes	Yes
60 to 70	Male		White British		Construction/Building		Diabetes		Never		I never had Covid-19		I never had Covid-19		No			No			Other	Potter in the garden and my shed	Yes	Pfizer-BioNTech		No	None		Less than a week	Family	Yes			Social distancing,Mask wearing	No	Yes	Yes	Yes
21 to 30	Male		Black, African, Caribbean or Black British		Finance services/Banking/Insurance		None		Never		I never had Covid-19		I never had Covid-19		No	No		No	Work,Pandemic		I don't feel any stress due to Covid-19		Yes	None						None	No	Other	May cause much worse complications in the future	No restrictions	No	Yes	No	Yes
50 to 60	Male		Asian/Asian British/Arabic		Self employed		None		Never		I never had Covid-19		I never had Covid-19		No			Yes	Covid-19,Vaccine,Work,Pandemic,Childcare/ school closures		Speak to family/ friends		Yes	None						None	No	Side effects		No restrictions	Yes	No	Yes	No
Over 70	Male		White British		Education/Academia		A condition which increases your risk of getting infections (such as SCID or sickle cell)		Jan 2020 to April 2020		Symptoms requiring hospitalisation		Longer than 14 days		Yes	No	Reduction in fitness,Negative impact on mental health,Negative impact on relationships	Yes	Work,Pandemic,Relationships,Childcare/ school closures		Speak to family/ friends		Yes	Pfizer-BioNTech		Yes	None		Less than a week	Yourself,Children,Family	Yes			Tier response system,Social distancing,Mask wearing	No	Yes	No	No
41 to 50	Male		Asian/Asian British/Arabic		Self employed		None		Never		I never had Covid-19		I never had Covid-19		No	No		No	Other	No stress	I don't feel any stress due to Covid-19		Yes	None						Don’t know	Yes			No restrictions	No	Yes	No	No
Over 70	Male		Asian/Asian British/Arabic		Education/Academia		Diabetes		May 2020 to August 2020		Symptoms managed at home			I am still having fever	No	No	Reduction in fitness,Negative impact on relationships	Yes	Covid-19		Watch movies/TV shows etc.,Excessive use of social media,Speak to family/ friends,Other	Reading	Yes	None						Yourself	Yes			Social distancing,Mask wearing	Yes	Yes	No	No
Over 70	Female		White British		Other	Retired	None		Never		I never had Covid-19		I never had Covid-19		No	No		Yes	Covid-19		Watch movies/TV shows etc.,Engage in hobbies		Yes	Pfizer-BioNTech		Yes	Tired		Less than a week	Yourself	Yes			Tier response system,Social distancing,Mask wearing	No	Yes	Yes	No
41 to 50	Female		Asian/Asian British/Arabic		Other	Housewife	None		Never		I never had Covid-19		I never had Covid-19		No	No	Reduction in fitness,Negative impact on mental health,Negative impact on relationships	Yes	Relationships		Speak to family/ friends		Yes	None		No	None			Yourself	No	Other	No security	Lockdown and observe R rate for longer	Yes	Yes	Yes	No
Over 70	Male		White British		Other	Retired optician	None		Never		I never had Covid-19		I never had Covid-19		No			No			I don't feel any stress due to Covid-19		Yes	Pfizer-BioNTech		Yes	None		Less than a week	Yourself,Family	Yes			Social distancing,Mask wearing	Yes	Yes	No	No
41 to 50	Female		White British		Education/Academia		None		Never		I never had Covid-19		I never had Covid-19		No			Yes	Covid-19,Work		Speak to family/ friends		Yes	Pfizer-BioNTech		Yes	Pain in muscle/swelling		Less than a week	Yourself,Family	Yes			Social distancing,Mask wearing	Yes	Yes	Yes	No
Over 70	Female		White British		Other	Housewife retired	None		Never		I never had Covid-19		I never had Covid-19		No			No			I don't feel any stress due to Covid-19		Yes	Pfizer-BioNTech		Yes	Pain in muscle/swelling		Less than a week	Yourself,Family	Yes			Social distancing,Mask wearing	Yes	Yes	No	No
41 to 50	Female		White British		Education/Academia		None		Sept 2020 to December 2020		Symptoms managed at home		Longer than 14 days		Yes	No	Reduction in fitness,Negative impact on mental health	Yes	Vaccine,Work,Relationships		Watch movies/TV shows etc.,Speak to family/ friends		Yes	Pfizer-BioNTech		Yes	Tired,Strange feeling,Headache,Fever,Pain in muscle/swelling,Itchy skin/rash,Lost smell		Over 2 weeks	Yourself,Children,Family	Yes			No restrictions	Yes	Yes	No	Yes
50 to 60	Female		White British		Education/Academia		Obesity		Never		I never had Covid-19		I never had Covid-19		No			Yes	Work,Pandemic,Finance		Watch movies/TV shows etc.,Speak to family/ friends		Yes	Oxford-AstraZeneca		Yes	Strange feeling		Less than a week	Yourself,Family	Yes			Tier response system,Mask wearing	Yes	Yes	Yes	Yes
31 to 40	Male		Asian/Asian British/Arabic		Retail/Buying		None		Never		I never had Covid-19		I never had Covid-19		No	No		No			I don't feel any stress due to Covid-19		Yes	None						Don’t know	No	Personal beliefs		No restrictions	No	Yes	Yes	Yes
60 to 70	Male		Asian/Asian British/Arabic		Other	Project Management	None		Never		I never had Covid-19		I never had Covid-19		No	No		No			Engage in hobbies		Yes	Pfizer-BioNTech		No	Pain in muscle/swelling		Less than a week	Yourself,Children,Family	Yes			No restrictions	Yes	Yes	No	No
41 to 50	Female		Asian/Asian British/Arabic		Medical (e.g. NHS, Pharmacy)		A severe lung condition (such as cystic fibrosis, severe asthma or severe COPD),Other	Impaired glucose tolerance test	January 2021 and onwards		Symptoms managed at home		Up to 14 days		No		Sick leave extending longer than self-isolation period	Yes	Covid-19		Excessive use of social media		No	None						None	No	Side effects		No restrictions	Yes	No	No	Yes
60 to 70	Male		White British		Other	Civil service	None		Never		I never had Covid-19		I never had Covid-19		No			Yes	Other	Concern about the effects of Covid-19 on others	Other	Go for a walk	Yes	Oxford-AstraZeneca		No	Tired,Headache,Aches/chills,Pain in muscle/swelling,Nausea		Less than a week	Yourself,Children,Family	Yes			Tier response system,Social distancing,Mask wearing	Yes	Yes	Yes	No
21 to 30	Female		Asian/Asian British/Arabic		Education/Academia		None		Never		I never had Covid-19		I never had Covid-19		No	No		Yes	Covid-19,Work,Pandemic,Studies/Performance,Finance		Watch movies/TV shows etc.,Excessive use of social media		Yes	Oxford-AstraZeneca		Yes	Tired,Strange feeling,Fever,Aches/chills,Pain in muscle/swelling		Less than a week	Yourself,Family	Yes			Lockdown and observe R rate for longer,Tier response system,Social distancing,Mask wearing	Yes	Yes	Yes	Yes
60 to 70	Male		Asian/Asian British/Arabic		Education/Academia		Diabetes		January 2021 and onwards		Symptoms requiring hospitalisation		Longer than 14 days		No	No	Sick leave extending longer than self-isolation period	Yes	Relationships		Watch movies/TV shows etc.,Speak to family/ friends,Engage in hobbies		Yes	Oxford-AstraZeneca		Yes	Tired,Other	Sleapy	Less than 2 weeks	Family	Yes			Mask wearing	Yes	Yes	Yes	Yes
50 to 60	Male		Asian/Asian British/Arabic		Retail/Buying		None		Never		I never had Covid-19		I never had Covid-19		No	No		No			I don't feel any stress due to Covid-19		No	Oxford-AstraZeneca		No	None		Less than a week	Yourself	Yes			Mask wearing	No	Yes	No	No
50 to 60	Female		Other	Middle East	Medical (e.g. NHS, Pharmacy)		None		Sept 2020 to December 2020		Symptoms requiring GP appointment/ 111 advice		Longer than 14 days		Yes	No	Sick leave extending longer than self-isolation period	Yes	Covid-19,Work,Pandemic		Watch movies/TV shows etc.,Excessive use of social media,Speak to family/ friends		Yes	Pfizer-BioNTech		Yes	Tired,Aches/chills		Less than a week	Yourself,Family	Yes			Lockdown and observe R rate for longer,Mask wearing	Yes	Yes	No	Yes
21 to 30	Male		Asian/Asian British/Arabic		Medical (e.g. NHS, Pharmacy)		None		Sept 2020 to December 2020		Symptoms managed at home		Up to 14 days		Yes	No	Reduction in fitness	Yes	Work		Sports/Games		Yes	Pfizer-BioNTech		No	Tired		Less than a week	Yourself,Children,Family	Yes			Mask wearing,No restrictions	Yes	Yes	Yes	Yes
60 to 70	Male		White British		Education/Academia		None		Never		I never had Covid-19		I never had Covid-19		No	No		No			I don't feel any stress due to Covid-19		Yes	Oxford-AstraZeneca		Yes	Headache		Less than a week	Yourself,Children,Family	Yes			Mask wearing	Yes	Yes	Yes	Yes
Over 70	Female		White British		Carer services		A severe lung condition (such as cystic fibrosis, severe asthma or severe COPD)		Never		I never had Covid-19		I never had Covid-19		No	No		Yes	Work,Relationships		Watch movies/TV shows etc.,Speak to family/ friends,Engage in hobbies		Yes	Oxford-AstraZeneca		No	Tired,Pain in muscle/swelling		Over 2 weeks	Yourself,Family	Yes			Social distancing,Mask wearing	Yes	Yes	No	Yes
60 to 70	Female		White British		Other	Retired teacher	None		Never		I never had Covid-19		I never had Covid-19		No			Yes	Pandemic		Speak to family/ friends		Yes	Oxford-AstraZeneca		Yes	Tired,Aches/chills,Pain in muscle/swelling		Less than a week	Yourself	Yes			Social distancing,Mask wearing	Yes	Yes	Yes	Yes
60 to 70	Female		White British		Education/Academia		None		Never		I never had Covid-19		I never had Covid-19		No	No		No			Watch movies/TV shows etc.,Sports/Games,Speak to family/ friends		Yes	Oxford-AstraZeneca		Yes	Tired		Less than a week	Yourself,Children,Family	Yes			Lockdown and observe R rate for longer,Social distancing,Mask wearing	Yes	Yes	Yes	Yes
Over 70	Male		White British		Education/Academia		None		Never		I never had Covid-19		I never had Covid-19		No	No		No			I don't feel any stress due to Covid-19		Yes	Oxford-AstraZeneca		No	None		Less than a week	Yourself,Children,Family	Yes			Social distancing,Mask wearing	No	Yes	Yes	Yes
21 to 30	Female		Other	Arab	Medical (e.g. NHS, Pharmacy)		None		Sept 2020 to December 2020		Symptoms managed at home		Up to 7 days		No	No	Reduction in fitness	Yes	Work,Pandemic,Finance,Relationships		Watch movies/TV shows etc.,Speak to family/ friends		Yes	Pfizer-BioNTech		Yes	Tired,Pain in muscle/swelling		Less than a week	Yourself,Family	Yes			No restrictions	Yes	Yes	Yes	Yes
21 to 30	Male		White British		Construction/Building		None		Sept 2020 to December 2020		Symptoms managed at home		Up to 14 days		No	No	Sick leave extending longer than self-isolation period	Yes	Covid-19,Work,Pandemic		Watch movies/TV shows etc.,Sports/Games		Yes	None						Don’t know	Yes			No restrictions	Yes	Yes	Yes	Yes
21 to 30	Female		White British		Finance services/Banking/Insurance		None		Never		I never had Covid-19		I never had Covid-19		No	No		No			I don't feel any stress due to Covid-19		Yes	None						Yourself,Family	Yes			Social distancing,Mask wearing	Yes	Yes	No	Yes
41 to 50	Female		White British		Medical (e.g. NHS, Pharmacy)		None		Never		Symptoms managed at home		Up to 14 days		No	No	Sick leave extending longer than self-isolation period,Reduction in fitness,Negative impact on mental health,Negative impact on relationships	Yes	Covid-19,Work,Pandemic,Studies/Performance,Finance,Relationships,Childcare/ school closures		Watch movies/TV shows etc.,Speak to family/ friends		Yes	Pfizer-BioNTech		Yes	Tired,Fever,Aches/chills		Less than a week	Yourself,Children,Family	Yes			Tier response system,Social distancing,Mask wearing	Yes	Yes	Yes	Yes
50 to 60	Female		Asian/Asian British/Arabic		Finance services/Banking/Insurance		Diabetes,Obesity		Never		I never had Covid-19		I never had Covid-19		No	No		No			Other	Pray	Yes	None						Yourself,Children,Family	Yes			Mask wearing	Yes	Yes	Yes	Yes
31 to 40	Female		Asian/Asian British/Arabic		Medical (e.g. NHS, Pharmacy)		None		January 2021 and onwards		I never had Covid-19		I never had Covid-19		No	No		Yes	Pandemic		Watch movies/TV shows etc.,Sports/Games,Speak to family/ friends		Yes	Pfizer-BioNTech		Yes	Tired		Less than a week	Yourself,Family	Yes			No restrictions	Yes	Yes	No	Yes
21 to 30	Male		White British		Finance services/Banking/Insurance		None		Never		I never had Covid-19		I never had Covid-19		No	No		Yes	Work,Pandemic		Sports/Games		Yes	None						Yourself,Family	Yes			No restrictions	Yes	Yes	No	Yes
60 to 70	Female		White British		Education/Academia		Obesity		Never		I never had Covid-19		I never had Covid-19		No			Yes	Pandemic		Watch movies/TV shows etc.,Speak to family/ friends,Engage in hobbies		Yes	Pfizer-BioNTech		Yes	None		Less than a week	Yourself,Family	Yes			Social distancing,Mask wearing	Yes	Yes	Yes	Yes
21 to 30	Female		White British		Medical (e.g. NHS, Pharmacy)		None		Never		I never had Covid-19		I never had Covid-19		No	No		Yes	Pandemic,Relationships		Speak to family/ friends		Yes	Pfizer-BioNTech		No	Tired,Strange feeling,Headache,Pain in muscle/swelling,Dizziness		Less than a week	Don’t know	Yes	Side effects		Social distancing,Mask wearing	No	Yes	No	No
41 to 50	Female		White British		Medical (e.g. NHS, Pharmacy)		None		Never		I never had Covid-19		I never had Covid-19		No	No		Yes	Covid-19,Work,Childcare/ school closures		Speak to family/ friends,Engage in hobbies		Yes	Pfizer-BioNTech		Yes	Aches/chills,Nausea,Enlarged lymph nodes		Less than a week	Yourself,Don’t know	Yes			Lockdown and observe R rate for longer,Tier response system,Social distancing,Mask wearing	No	Yes	No	No
31 to 40	Male		Asian/Asian British/Arabic		Medical (e.g. NHS, Pharmacy)		None		Never		I never had Covid-19		I never had Covid-19		No	No		No	Vaccine,Work		Engage in hobbies		Yes	Oxford-AstraZeneca		No	Strange feeling,Headache,Fever,Aches/chills,Pain in muscle/swelling		Less than a week	Family	Yes	Side effects		Tier response system,Mask wearing	Yes	Yes	Yes	Yes
50 to 60	Female		White British		Medical (e.g. NHS, Pharmacy)		None		Never		I never had Covid-19		I never had Covid-19		No	No		Yes	Other	Family safety	Watch movies/TV shows etc.		Yes	Pfizer-BioNTech		No	Nausea		Less than a week	Yourself	Yes			No restrictions	Yes	Yes	Yes	Yes
31 to 40	Female		White British		Medical (e.g. NHS, Pharmacy)		None		Jan 2020 to April 2020		Symptoms managed at home		Longer than 14 days		Yes	No	Sick leave extending longer than self-isolation period,Reduction in fitness,Negative impact on mental health	Yes	Covid-19,Work,Pandemic,Finance,Relationships		Watch movies/TV shows etc.,Excessive use of social media		Yes	Pfizer-BioNTech		No	Tired,Strange feeling		Less than a week	Yourself,Children,Family	No	Side effects		Tier response system,Social distancing,Mask wearing	Yes	Yes	No	Yes
50 to 60	Male		Asian/Asian British/Arabic		Medical (e.g. NHS, Pharmacy)		None		Never		I never had Covid-19		I never had Covid-19		No	No		Yes	Work		Excessive use of social media,Speak to family/ friends		Yes	Pfizer-BioNTech		Yes	None		Less than a week	Yourself,Family	Yes			Social distancing	Yes	Yes	Yes	Yes
31 to 40	Female		White British		Medical (e.g. NHS, Pharmacy)		None		Sept 2020 to December 2020		Symptoms managed at home		Longer than 14 days		No	No	Reduction in fitness	Yes	Childcare/ school closures		Speak to family/ friends		Yes	None						None	No	Personal beliefs		No restrictions	Yes	Yes	Yes	No
60 to 70	Female		White British		Education/Academia		None		Never		I never had Covid-19		I never had Covid-19		No	No		No			I don't feel any stress due to Covid-19		Yes	Oxford-AstraZeneca		No	Aches/chills		Less than a week	Yourself,Children,Family	Yes			Social distancing,Mask wearing	Yes	Yes	Yes	Yes
21 to 30	Female		White European		Medical (e.g. NHS, Pharmacy)		None		Never		I never had Covid-19		I never had Covid-19		No			Yes	Covid-19,Relationships		Watch movies/TV shows etc.,Speak to family/ friends		Yes	None						Yourself,Family	Yes			No restrictions	Yes	Yes	Yes	Yes
21 to 30	Female		White British		Medical (e.g. NHS, Pharmacy)		None		Never		I never had Covid-19		I never had Covid-19		No			Yes	Work		Excessive use of social media		Yes	Pfizer-BioNTech		Yes	Tired		Less than a week	Family	Yes			No restrictions	No	Yes	No	No
41 to 50	Female		White British		Medical (e.g. NHS, Pharmacy)		A severe lung condition (such as cystic fibrosis, severe asthma or severe COPD)		Never		I never had Covid-19		I never had Covid-19		No			Yes	Work,Childcare/ school closures		Watch movies/TV shows etc.,Speak to family/ friends		Yes	Pfizer-BioNTech		Yes	Tired,Aches/chills		Less than a week	Yourself,Children,Family	Yes			Social distancing	Yes	Yes	No	No
31 to 40	Female		White European		Medical (e.g. NHS, Pharmacy)		None		Never		Asymptomatic		I never had Covid-19		No	No		Yes	Work,Pandemic		Watch movies/TV shows etc.,Speak to family/ friends		Yes	Oxford-AstraZeneca		Yes	None		Less than a week	Don’t know	No	Side effects		No restrictions	No	Yes	No	Yes
31 to 40	Male		White British		Finance services/Banking/Insurance		None		Never		I never had Covid-19		I never had Covid-19		No	No		No			Sports/Games		Yes	None		Yes	None			Yourself,Children,Family	Yes			No restrictions	Yes	Yes	No	No
21 to 30	Female		White European		Medical (e.g. NHS, Pharmacy)		Obesity		Never		I never had Covid-19		I never had Covid-19		No	No		Yes	Vaccine,Work		Watch movies/TV shows etc.,Speak to family/ friends		Yes	Oxford-AstraZeneca		No	Aches/chills		Less than a week	None	No	Personal beliefs		No restrictions	Yes	No	No	No
31 to 40	Male		Asian/Asian British/Arabic		Other	Unemployed	None		Never		I never had Covid-19		I never had Covid-19		No	No		Yes	Work		Watch movies/TV shows etc.,Excessive use of social media,Sports/Games		Yes	None						None	No	Needle-phobia,Personal beliefs		No restrictions	Yes	No	No	No
41 to 50	Female		White European		Other	Admin clerk	None		Sept 2020 to December 2020		Symptoms managed at home		Up to 14 days		Yes	No	Sick leave extending longer than self-isolation period,Reduction in fitness,Negative impact on mental health	Yes	Covid-19,Work,Pandemic		Watch movies/TV shows etc.,Speak to family/ friends,Engage in hobbies		Yes	Pfizer-BioNTech		Yes	None,Other	Very sore arm	Less than a week	Yourself,Children,Family	Yes			Tier response system,Social distancing,Mask wearing	Yes	Yes	Yes	Yes
50 to 60	Female		Other	Arab	Education/Academia		None		Never		I never had Covid-19		I never had Covid-19		No			No			Sports/Games,Speak to family/ friends		Yes	Oxford-AstraZeneca		Yes	Tired,Headache		Less than 2 weeks	Yourself,Children,Family	Yes			Lockdown and observe R rate for longer	Yes	Yes	Yes	No
21 to 30	Male		Asian/Asian British/Arabic		Finance services/Banking/Insurance		None		Never		I never had Covid-19		I never had Covid-19		No	No		Yes	Work,Pandemic,Studies/Performance,Relationships		Watch movies/TV shows etc.,Sports/Games		Yes	None		No				Don’t know	Yes	Side effects		Lockdown and observe R rate for longer,Tier response system	Yes	Yes	Yes	Yes
31 to 40	Female		Asian/Asian British/Arabic		Other	House wife	None		Never		I never had Covid-19		I never had Covid-19		No	No		Yes	Covid-19,Pandemic,Studies/Performance,Finance,Relationships,Childcare/ school closures		Watch movies/TV shows etc.,Speak to family/ friends		Yes	Oxford-AstraZeneca		Yes	Pain in muscle/swelling		Less than a week	Family	No	Side effects		Lockdown and observe R rate for longer,Tier response system,Social distancing,Mask wearing	Yes	Yes	Yes	Yes
Under 20	Male		Asian/Asian British/Arabic		Education/Academia		None		Never		I never had Covid-19		I never had Covid-19		No	No		Yes	Work		Watch movies/TV shows etc.,Speak to family/ friends,Engage in hobbies		Yes	None						Yourself,Children,Family	Yes			Mask wearing,No restrictions	Yes	Yes	Yes	No
41 to 50	Male		White European		Other	Production	None		Never		I never had Covid-19		I never had Covid-19		No	No		Yes	Covid-19,Pandemic,Childcare/ school closures		Sports/Games,Speak to family/ friends		Yes	Oxford-AstraZeneca		Yes	Tired,Strange feeling		Less than a week	Yourself	Yes			Social distancing,Mask wearing	No	Yes	No	No
41 to 50	Female		Other	Polish	Education/Academia		Other	Hepatitis	Never		I never had Covid-19		I never had Covid-19		No	No		No			I don't feel any stress due to Covid-19		Yes	Pfizer-BioNTech		Yes	Headache,Fever,Pain in muscle/swelling		Less than a week	Family	Yes			Lockdown and observe R rate for longer,Tier response system,Social distancing	No	Yes	No	No
Under 20	Female		White European		Finance services/Banking/Insurance		None		January 2021 and onwards		Symptoms managed at home		Up to 3 days		No	No	Negative impact on mental health	Yes	Pandemic,Finance		Watch movies/TV shows etc.,Speak to family/ friends,Engage in hobbies		Yes	None			None			Yourself,Family	Yes	Side effects		No restrictions	Yes	Yes	No	Yes
Over 70	Male		White British		Other	retired	None		Never		I never had Covid-19		I never had Covid-19		No	No		No	Covid-19		I don't feel any stress due to Covid-19		Yes	Pfizer-BioNTech		Yes	None		Less than a week	Yourself	Yes			Social distancing	No	Yes	No	No
31 to 40	Female		White European		Construction/Building		None		Never		I never had Covid-19		I never had Covid-19		No			Yes	Childcare/ school closures,Other	I couldn't be on the funeral	Speak to family/ friends		Yes	None						None	No	Other	You can have it again after vaccine	No restrictions	Yes	Yes	No	Yes
31 to 40	Female		White British		Medical (e.g. NHS, Pharmacy)		None		Never		I never had Covid-19		I never had Covid-19		No	No		No			Speak to family/ friends,Engage in hobbies		Yes	Oxford-AstraZeneca		No	Headache,Fever,Aches/chills		Less than a week	Yourself	Yes			Tier response system,Social distancing,Mask wearing	No	Yes	Yes	No
31 to 40	Male		White British		Construction/Building		None		Never		I never had Covid-19		I never had Covid-19		No	No		Yes	Covid-19		Speak to family/ friends		Yes	Pfizer-BioNTech		Yes	None		Less than a week	Family	Yes			Social distancing,Mask wearing	Yes	Yes	Yes	Yes
60 to 70	Male		White British		Medical (e.g. NHS, Pharmacy)		An intense course of radiotherapy (radical radiotherapy) for lung cancer		Never		I never had Covid-19		I never had Covid-19		No			No			I don't feel any stress due to Covid-19		Yes	Oxford-AstraZeneca		No	None		Less than a week	Yourself,Children,Family	Yes			No restrictions	No	Yes	No	Yes
21 to 30	Female		White British		Other	Civil service	None		Never		Symptoms managed at home		Up to 7 days		Yes	No	Reduction in fitness,Negative impact on mental health	No			Watch movies/TV shows etc.,Engage in hobbies		Yes	Oxford-AstraZeneca		Yes	Tired,Headache,Fever,Aches/chills,Pain in muscle/swelling,Dizziness		Less than a week	Yourself,Children,Family	Yes			Social distancing,Mask wearing	Yes	Yes	Yes	No
50 to 60	Female		Asian/Asian British/Arabic		Medical (e.g. NHS, Pharmacy)		None		Sept 2020 to December 2020		Symptoms requiring GP appointment/ 111 advice		Longer than 14 days		Yes	No	Sick leave extending longer than self-isolation period,Reduction in fitness	No	Other	I don’t feel stressed answered no to your first question	I don't feel any stress due to Covid-19		Yes	Pfizer-BioNTech		No	Tired,Headache,Fever,Aches/chills,Allergic reactions,Pain in muscle/swelling,Nausea,Itchy skin/rash,Enlarged lymph nodes		Less than 2 weeks	Family	Yes			No restrictions	Yes	Yes	No	No
31 to 40	Female		White British		Medical (e.g. NHS, Pharmacy)		None		Never		I never had Covid-19		I never had Covid-19		No			No			I don't feel any stress due to Covid-19		Yes	Pfizer-BioNTech		Yes	Pain in muscle/swelling		Less than a week	Yourself,Family	Yes			Lockdown and observe R rate for longer,Tier response system,Social distancing	No	Yes	No	No
50 to 60	Female		Asian/Asian British/Arabic		Other	House wife	None		Jan 2020 to April 2020		I never had Covid-19		I never had Covid-19		No			Yes	Covid-19		Speak to family/ friends		Yes	Oxford-AstraZeneca		Yes	Tired,Headache		Less than a week	Family	Yes			No restrictions	Yes	Yes	No	No
50 to 60	Female		Asian/Asian British/Arabic		Other	Housewife	None		Never		I never had Covid-19		I never had Covid-19		No			Yes	Finance,Relationships		Speak to family/ friends		Yes	Oxford-AstraZeneca		Yes	Tired,Headache		Less than a week	Family	Yes			No restrictions	Yes	Yes	No	No
50 to 60	Male		Other	Arab	Construction/Building		None		Never		I never had Covid-19		I never had Covid-19		No	No		Yes	Covid-19,Work,Pandemic,Finance		Other	Did not do anything	Yes	Oxford-AstraZeneca		Yes	Tired,Headache,Fever,Aches/chills		Less than a week	Family	No	Side effects		Tier response system	Yes	Yes	Yes	No
31 to 40	Female		White European		Charities		None		Never		I never had Covid-19		I never had Covid-19		No	No		Yes	Vaccine,Work,Pandemic		Sports/Games		Yes	Oxford-AstraZeneca		Yes	None		Less than a week	Yourself,Family	Yes			Mask wearing,No restrictions	Yes	Yes	Yes	No
41 to 50	Female		White British		Medical (e.g. NHS, Pharmacy)		None		Jan 2020 to April 2020		Symptoms requiring GP appointment/ 111 advice		Longer than 14 days		Yes	No	Negative impact on mental health,Negative impact on relationships	Yes	Relationships,Other	Don’t want to be at specific.	Other	Counselling	Yes	Oxford-AstraZeneca		Yes	Tired,Headache,Fever,Nausea,Vomiting,Lost smell		Less than a week	Yourself,Family	Yes			Tier response system,Social distancing,Mask wearing	Yes	Yes	Yes	No
41 to 50	Female		White European		Medical (e.g. NHS, Pharmacy)		Obesity		Sept 2020 to December 2020		Symptoms managed at home		Up to 14 days		Yes	No	Reduction in fitness	Yes	Pandemic		Watch movies/TV shows etc.		Yes	Oxford-AstraZeneca		No	Tired,Headache,Fever,Pain in muscle/swelling,Enlarged lymph nodes,Other	Trigeminal Neuralgia, Ear issues, hearing loss	Over 2 weeks	Family	No	Side effects		Lockdown and observe R rate for longer,Tier response system,Social distancing,Mask wearing	Yes	Yes	Yes	Yes
21 to 30	Male		White British		Medical (e.g. NHS, Pharmacy)		None		Never		I never had Covid-19		I never had Covid-19		No			Yes	Covid-19,Work,Pandemic		Excessive use of social media,Speak to family/ friends		Yes	Pfizer-BioNTech		No	None		Less than a week	Yourself,Children,Family	Yes			No restrictions	Yes	Yes	Yes	Yes
50 to 60	Female		Asian/Asian British/Arabic		Education/Academia		None		Never		Symptoms managed at home		Up to 14 days		No	No	Sick leave extending longer than self-isolation period,Reduction in fitness	No			Watch movies/TV shows etc.,Excessive use of social media,Sports/Games,Speak to family/ friends,Engage in hobbies		Yes	Oxford-AstraZeneca		Yes	Tired,Headache		Less than a week	Yourself	Yes			Lockdown and observe R rate for longer,Mask wearing	Yes	Yes	No	Yes
60 to 70	Female		White British		Medical (e.g. NHS, Pharmacy)		None		Sept 2020 to December 2020		Asymptomatic		Up to 3 days		No	No		Yes	Work		Excessive use of social media,Engage in hobbies		Yes	Oxford-AstraZeneca		No	Tired,Headache,Fever,Pain in muscle/swelling		Less than a week	Yourself,Children,Family	Yes			Social distancing	Yes	Yes	Yes	Yes
31 to 40	Female		White British		Medical (e.g. NHS, Pharmacy)		None		Never		I never had Covid-19		I never had Covid-19		No			Yes	Covid-19,Pandemic		Watch movies/TV shows etc.,Excessive use of social media,Sports/Games,Speak to family/ friends,Engage in hobbies		Yes	Oxford-AstraZeneca		Yes	Tired,Strange feeling,Headache,Aches/chills,Dizziness		Less than a week	Yourself,Children,Family	Yes			Lockdown and observe R rate for longer,Tier response system,Social distancing,Mask wearing	Yes	Yes	Yes	Yes
60 to 70	Female		White British		Other	Retired	None		Never		I never had Covid-19		I never had Covid-19		No			Yes	Other	Bereaved	Speak to family/ friends		Yes	Oxford-AstraZeneca		Yes	Tired		Less than a week	Yourself,Children,Family	Yes			No restrictions	Yes	Yes	No	No
50 to 60	Female		White British		Medical (e.g. NHS, Pharmacy)		None		Never		I never had Covid-19		I never had Covid-19		No	No		Yes	Relationships		Speak to family/ friends		Yes	Oxford-AstraZeneca		Yes	Headache,Fever,Aches/chills		Less than a week	Yourself,Family	Yes			Mask wearing	Yes	Yes	No	No
31 to 40	Female		White British		Other	Software	Other	.	Never		I never had Covid-19		I never had Covid-19		No	No		Yes	Covid-19,Pandemic		Watch movies/TV shows etc.,Sports/Games,Speak to family/ friends		Yes	Oxford-AstraZeneca		Yes	Tired,Strange feeling,Headache,Fever,Aches/chills,Pain in muscle/swelling,Nausea,Dizziness,Itchy skin/rash		Less than a week	Yourself,Children,Family	Yes			Lockdown and observe R rate for longer,Tier response system,Social distancing,Mask wearing	Yes	Yes	Yes	Yes
60 to 70	Female		White British		Other	Property	None		Never		I never had Covid-19		I never had Covid-19		No			No			I don't feel any stress due to Covid-19		Yes	Oxford-AstraZeneca		Yes	Tired,Strange feeling,Headache,Fever		Less than a week	Yourself,Children,Family	Yes			Social distancing,Mask wearing	Yes	Yes	No	Yes
60 to 70	Female		White British		Other	Property sales	None		Never		I never had Covid-19		I never had Covid-19		No	No		No	Other	Scared of the whole situatio	I don't feel any stress due to Covid-19		Yes	Oxford-AstraZeneca		Yes	Tired,Strange feeling,Headache,Fever		Less than a week	Yourself,Children,Family	Yes			No restrictions	Yes	Yes	No	Yes
50 to 60	Female		White British		Charities		None		Sept 2020 to December 2020		Symptoms managed at home		Up to 14 days		Yes	No	Development of other illnesses	No			I don't feel any stress due to Covid-19		Yes	Pfizer-BioNTech		Yes	Headache,Fever		Less than a week	Yourself,Children,Family	Yes			Social distancing,Mask wearing	No	Yes	No	No
31 to 40	Female		Other	Soutg Korean	Medical (e.g. NHS, Pharmacy)		None		Never		I never had Covid-19		I never had Covid-19		No			No	Covid-19,Pandemic,Other	Travel	I don't feel any stress due to Covid-19		Yes	Pfizer-BioNTech		No	Tired,Headache,Aches/chills,Pain in muscle/swelling,Itchy skin/rash		Less than a week	Yourself,Children,Family	No	Other	No safer or worse before or after vaccine	Social distancing,Mask wearing	No	Yes	Yes	Yes
50 to 60	Female		White British		Carer services		None		Never		I never had Covid-19		I never had Covid-19		No	No		Yes	Pandemic		Speak to family/ friends		Yes	Oxford-AstraZeneca		Yes	Tired,Strange feeling,Headache,Fever,Pain in muscle/swelling		Less than a week	Family	Yes			No restrictions	Yes	Yes	Yes	Yes
21 to 30	Female		White British		Education/Academia		None		Never		I never had Covid-19		I never had Covid-19		No	No		Yes	Covid-19,Work		Watch movies/TV shows etc.,Excessive use of social media,Speak to family/ friends		Yes	None						Yourself,Family	Yes			Social distancing,Mask wearing	Yes	Yes	Yes	Yes
21 to 30	Male		White British		Other	Manufacturing	None		Never		Symptoms managed at home		Up to 7 days		No	No	Reduction in fitness	No			I don't feel any stress due to Covid-19		Yes	None						Yourself,Family	Yes			Tier response system,Social distancing	Yes	Yes	No	Yes
50 to 60	Female		White British		Medical (e.g. NHS, Pharmacy)		None		Never		I never had Covid-19		I never had Covid-19		No			Yes	Covid-19		Speak to family/ friends		Yes	Pfizer-BioNTech		Yes	Tired,Headache,Pain in muscle/swelling		Less than a week	Family	Yes			Mask wearing	Yes	Yes	Yes	Yes
21 to 30	Female		White British		Other	Human resource	None		Never		I never had Covid-19		I never had Covid-19		No	No		No			Excessive use of social media		Yes	None						Yourself,Family	Yes			Mask wearing	Yes	Yes	No	No
50 to 60	Female		Other	Arabic	Medical (e.g. NHS, Pharmacy)		None		Never		I never had Covid-19		I never had Covid-19		No			Yes	Pandemic		Sports/Games		Yes	Pfizer-BioNTech		Yes	Headache,Pain in muscle/swelling		Less than a week	Yourself,Family	Yes			Social distancing	No	Yes	No	Yes
21 to 30	Female		White British		Medical (e.g. NHS, Pharmacy)		None		Never		I never had Covid-19		I never had Covid-19		No			No			I don't feel any stress due to Covid-19		Yes	Pfizer-BioNTech		Yes	Tired,Headache,Pain in muscle/swelling		Less than a week	Yourself	Yes			Social distancing,Mask wearing	Yes	Yes	Yes	No
41 to 50	Female		White British		Education/Academia		None		Never		I never had Covid-19		I never had Covid-19		No	No		No			Sports/Games,Engage in hobbies		Yes	Oxford-AstraZeneca		No	Pain in muscle/swelling		Less than a week	Yourself,Children,Family	Yes			No restrictions	Yes	Yes	Yes	Yes
31 to 40	Female		White British		Other	Stay at home parent	Other	Asthma	Never		I never had Covid-19		I never had Covid-19		No			Yes	Studies/Performance,Relationships,Childcare/ school closures,Other	Social interaction	Watch movies/TV shows etc.,Speak to family/ friends,Engage in hobbies		Yes	Oxford-AstraZeneca		No	Tired,Aches/chills		Less than a week	Yourself	Yes			Social distancing,Mask wearing	Yes	Yes	Yes	Yes
50 to 60	Female		White British		Retail/Buying		None		Jan 2020 to April 2020		Symptoms managed at home		Up to 14 days		Yes	No	Sick leave extending longer than self-isolation period,Reduction in fitness	Yes	Other	Fitness	Excessive use of social media,Other	Running	Yes	Oxford-AstraZeneca		No	Tired,Headache,Aches/chills		Less than a week	Yourself,Family	Yes			No restrictions	Yes	Yes	No	Yes
50 to 60	Female		White British		Medical (e.g. NHS, Pharmacy)		A condition which increases your risk of getting infections (such as SCID or sickle cell)		Never		I never had Covid-19		I never had Covid-19		No			No			I don't feel any stress due to Covid-19		Yes	Pfizer-BioNTech		No	Headache,Dizziness		Less than a week	Yourself,Children,Family	Yes			No restrictions	Yes	Yes	No	Yes
31 to 40	Female		White British		Carer services		None		Never		I never had Covid-19		I never had Covid-19		No			Yes	Work,Childcare/ school closures		Watch movies/TV shows etc.,Speak to family/ friends		Yes	Oxford-AstraZeneca		Yes	Headache,Pain in muscle/swelling		Less than a week	Yourself,Family	Yes			Lockdown and observe R rate for longer,Social distancing,Mask wearing	No	Yes	No	No
60 to 70	Female		White British		Medical (e.g. NHS, Pharmacy)		None		Never		I never had Covid-19		I never had Covid-19		No	No		No			Speak to family/ friends		Yes	Pfizer-BioNTech		Yes	None		Less than a week	Yourself,Family	Yes			Social distancing,Mask wearing	No	Yes	Yes	Yes
31 to 40	Male		Asian/Asian British/Arabic		Finance services/Banking/Insurance		None		January 2021 and onwards		Symptoms managed at home		Up to 7 days		No	No	Negative impact on relationships	Yes	Covid-19		Excessive use of social media		Yes	Oxford-AstraZeneca		Yes	None		Less than a week	Family	Yes	Personal beliefs		No restrictions	Yes	Yes	Yes	Yes
31 to 40	Female		Asian/Asian British/Arabic		Retail/Buying		None		Never		I never had Covid-19		I never had Covid-19		No	No		Yes	Childcare/ school closures		Watch movies/TV shows etc.,Engage in hobbies		Yes	None						Yourself	Yes			Mask wearing	Yes	Yes	Yes	Yes
41 to 50	Male		Asian/Asian British/Arabic		Other	DWP	None		Never		I never had Covid-19		I never had Covid-19		No	No		Yes	Work,Childcare/ school closures		Excessive use of social media,Engage in hobbies		Yes	Oxford-AstraZeneca		Yes	Tired,Strange feeling,Headache,Fever		Less than a week	Family	Yes			Social distancing	Yes	Yes	Yes	Yes
60 to 70	Female		White British		Education/Academia		None		Never		I never had Covid-19		I never had Covid-19		No	No		Yes	Relationships		Speak to family/ friends		Yes	Oxford-AstraZeneca		Yes	Tired,Strange feeling		Less than a week	Yourself,Children,Family	Yes			Tier response system	Yes	Yes	No	Yes
31 to 40	Male		Asian/Asian British/Arabic		Education/Academia		None		Sept 2020 to December 2020		Symptoms managed at home		Up to 7 days		No		Reduction in fitness	Yes	Covid-19,Vaccine,Work,Other	Travel	Watch movies/TV shows etc.,Excessive use of social media,Speak to family/ friends		Yes	None						None	No	Side effects		No restrictions	Yes	Yes	Yes	Yes
50 to 60	Female		White British		Medical (e.g. NHS, Pharmacy)		None		Never		I never had Covid-19		I never had Covid-19		No	No		Yes	Covid-19,Pandemic,Finance,Relationships		Watch movies/TV shows etc.,Speak to family/ friends,Engage in hobbies		Yes	Pfizer-BioNTech		Yes	Headache		Less than a week	Yourself,Children,Family	Yes			Social distancing,Mask wearing	Yes	Yes	Yes	Yes
41 to 50	Male		Asian/Asian British/Arabic		Education/Academia		None		Never		I never had Covid-19		I never had Covid-19		No	No		Yes	Pandemic		Speak to family/ friends,Engage in hobbies		Yes	Pfizer-BioNTech		Yes	Aches/chills		Less than a week	Yourself,Family	Yes			Mask wearing	No	Yes	No	Yes
60 to 70	Male		Asian/Asian British/Arabic		Self employed		Diabetes		Never		I never had Covid-19		I never had Covid-19		No	No		No			I don't feel any stress due to Covid-19		Yes	Pfizer-BioNTech		Yes	None		Less than a week	Yourself,Children,Family	Yes			Mask wearing	Yes	Yes	Yes	Yes
41 to 50	Male		Asian/Asian British/Arabic		Other	IT	None		Never		I never had Covid-19		I never had Covid-19		No	No		No	Pandemic,Childcare/ school closures		Engage in hobbies		Yes	Oxford-AstraZeneca		Yes	Aches/chills		Less than a week	Yourself,Children,Family	No	Side effects		Social distancing,Mask wearing	No	Yes	Yes	Yes
31 to 40	Male		Asian/Asian British/Arabic		Education/Academia		None		Sept 2020 to December 2020		Symptoms managed at home		Up to 3 days		Yes	No	Reduction in fitness	No			I don't feel any stress due to Covid-19		Yes	None			Tired,Lost smell		Over 2 weeks	Don’t know	Yes			Tier response system,Social distancing,Mask wearing	Yes	Yes	No	Yes
31 to 40	Male		White European		Education/Academia		None		Never		I never had Covid-19		I never had Covid-19		No	No		No			I don't feel any stress due to Covid-19		Yes	Oxford-AstraZeneca		No	Tired,Headache,Fever		Less than a week	Yourself,Children,Family	Yes			No restrictions	No	Yes	Yes	Yes
60 to 70	Female		White British		Education/Academia		A severe lung condition (such as cystic fibrosis, severe asthma or severe COPD),A condition which increases your risk of getting infections (such as SCID or sickle cell),On medicine that makes you much more likely to get infections (such as high doses of steroids or immunosuppressant medicine)		Never		I never had Covid-19		I never had Covid-19		No			No			Engage in hobbies		Yes	Oxford-AstraZeneca		No	Headache,Pain in muscle/swelling		Less than a week	Yourself,Children,Family	Yes			Lockdown and observe R rate for longer,Tier response system,Social distancing,Mask wearing	No	Yes	Yes	Yes
41 to 50	Female		White British		Education/Academia		None		Never		I never had Covid-19		I never had Covid-19		No			Yes	Work		Speak to family/ friends		Yes	Oxford-AstraZeneca		No	Headache		Less than a week	Yourself,Children,Family	Yes			Tier response system,Social distancing	Yes	Yes	Yes	No
41 to 50	Male		White British		Transport/Logistics		None		Never		I never had Covid-19		I never had Covid-19		No			Yes	Work		Speak to family/ friends,Engage in hobbies		Yes	Oxford-AstraZeneca		No	Tired,Headache,Fever,Aches/chills,Pain in muscle/swelling,Nausea		Less than a week	Yourself,Children,Family	Yes			No restrictions	Yes	Yes	No	No
50 to 60	Female		White British		Other	Housewife	None		Never		I never had Covid-19		I never had Covid-19		No			Yes	Pandemic		Watch movies/TV shows etc.,Sports/Games,Speak to family/ friends,Engage in hobbies		Yes	Oxford-AstraZeneca		Yes	Tired,Aches/chills		Less than a week	Yourself,Children,Family	Yes			Tier response system	No	Yes	No	No
31 to 40	Female		White British		Education/Academia		None		Never		I never had Covid-19		I never had Covid-19		No			Yes	Pandemic,Childcare/ school closures		Engage in hobbies		Yes	None						Yourself,Family	Yes			Social distancing,Mask wearing	No	No	Yes	Yes
41 to 50	Male		White British		Construction/Building		Other	Asthma	Never		I never had Covid-19		I never had Covid-19		No	No		No			I don't feel any stress due to Covid-19		Yes	None						None	No	Side effects		No restrictions	No	No	No	No
41 to 50	Female		White British		Retail/Buying		A severe lung condition (such as cystic fibrosis, severe asthma or severe COPD)		Never		I never had Covid-19		I never had Covid-19		No	No		Yes	Covid-19,Pandemic,Relationships,Childcare/ school closures		Watch movies/TV shows etc.,Sports/Games,Engage in hobbies		Yes	Oxford-AstraZeneca		Yes	None		Less than a week	Yourself,Children,Family	Yes			Tier response system,Social distancing,Mask wearing	Yes	Yes	Yes	Yes
50 to 60	Female		White British		Medical (e.g. NHS, Pharmacy)		None		Never		I never had Covid-19		I never had Covid-19		No	No		Yes	Work		Speak to family/ friends		Yes	Pfizer-BioNTech		No	Pain in muscle/swelling		Less than a week	Yourself,Children,Family	Yes			Tier response system	No	Yes	No	No
41 to 50	Female		White British		Self employed		None		Other	Not tested but had symptoms march 2020	Symptoms managed at home		Up to 7 days		No	No	Reduction in fitness	Yes	Childcare/ school closures		Speak to family/ friends		Yes	Oxford-AstraZeneca		No	Tired,Fever,Aches/chills		Less than 2 weeks	Yourself,Children,Family	Yes			Tier response system	Yes	Yes	Yes	No
50 to 60	Female		White British		Self employed		None		Never		I never had Covid-19		I never had Covid-19		No			Yes	Pandemic,Childcare/ school closures		Watch movies/TV shows etc.		Yes	Oxford-AstraZeneca		Yes	Aches/chills		Less than a week	Yourself,Children,Family	Yes			Tier response system	No	Yes	Yes	Yes
41 to 50	Female		Asian/Asian British/Arabic		Education/Academia		None		Never		I never had Covid-19		I never had Covid-19		No	No		No			I don't feel any stress due to Covid-19		No	Pfizer-BioNTech		Yes	Tired,Aches/chills,Pain in muscle/swelling		Less than a week	Children	Yes			Social distancing,Mask wearing	Yes	Yes	Yes	Yes
41 to 50	Female		White British		Medical (e.g. NHS, Pharmacy)		None		Jan 2020 to April 2020		Symptoms managed at home		Up to 7 days		No	No	Reduction in fitness	Yes	Work,Relationships		Speak to family/ friends		Yes	Pfizer-BioNTech		Yes	Tired,Headache,Fever,Aches/chills,Nausea		Less than a week	Yourself,Children,Family	Yes			Social distancing,Mask wearing	Yes	Yes	Yes	Yes
50 to 60	Female		White British		Finance services/Banking/Insurance		None		Never		I never had Covid-19		I never had Covid-19		No	No		Yes	Work,Childcare/ school closures		Sports/Games		Yes	Oxford-AstraZeneca		No	Pain in muscle/swelling		Less than a week	Yourself	No	Side effects		No restrictions	Yes	Yes	No	No
41 to 50	Female		White British		Retail/Buying		On medicine that makes you much more likely to get infections (such as high doses of steroids or immunosuppressant medicine)		Never		I never had Covid-19		I never had Covid-19		No	No		Yes	Work,Pandemic,Finance,Childcare/ school closures		Watch movies/TV shows etc.,Excessive use of social media,Speak to family/ friends		Yes	Oxford-AstraZeneca		Yes	Tired,Headache,Aches/chills		Less than a week	Yourself,Children,Family	Yes			Mask wearing	Yes	Yes	Yes	Yes
41 to 50	Female		White British		Education/Academia		Obesity		January 2021 and onwards		Symptoms managed at home		Up to 14 days		No		Reduction in fitness	Yes	Covid-19,Work,Pandemic,Childcare/ school closures		Watch movies/TV shows etc.,Speak to family/ friends		Yes	Oxford-AstraZeneca		Yes	Tired,Headache,Pain in muscle/swelling,Nausea		Less than a week	Yourself,Children,Family	Yes			Lockdown and observe R rate for longer,Tier response system,Social distancing,Mask wearing	Yes	Yes	Yes	Yes
41 to 50	Female		White British		Education/Academia		None		Never		I never had Covid-19		I never had Covid-19		No	No		No			I don't feel any stress due to Covid-19		Yes	Oxford-AstraZeneca		Yes	Headache,Fever		Less than a week	Yourself,Family	Yes			Social distancing,Mask wearing	No	Yes	Yes	No
41 to 50	Female		White British		Education/Academia		Other	Coeliac Disease	Never		I never had Covid-19		I never had Covid-19		No			No			Speak to family/ friends		Yes	Pfizer-BioNTech		Yes	None		Less than a week	Yourself	Yes			No restrictions	No	Yes	No	No
50 to 60	Female		White British		Other	Retired health sector worker	A problem with your spleen or your spleen has been removed (splenectomy)		Never		I never had Covid-19		I never had Covid-19		No			No			I don't feel any stress due to Covid-19		Yes	Pfizer-BioNTech		Yes	Tired,Headache		Less than a week	Yourself,Children,Family	Yes			No restrictions	Yes	Yes	No	No
60 to 70	Male		Asian/Asian British/Arabic		Other	Food production	None		Never		I never had Covid-19		I never had Covid-19		No	No		Yes	Vaccine,Work		Other	Continue work	Yes	Pfizer-BioNTech		Yes	Tired,Pain in muscle/swelling		Less than a week	Yourself,Family	Yes			Tier response system,Mask wearing	No	Yes	Yes	No
41 to 50	Male		Asian/Asian British/Arabic		Self employed		None		Jan 2020 to April 2020		Symptoms managed at home		Up to 14 days		No	No	Reduction in fitness	Yes	Covid-19,Studies/Performance,Finance,Relationships,Childcare/ school closures		Sports/Games		Yes	Oxford-AstraZeneca		No	Tired,Dizziness		Less than a week	Yourself,Children,Family	Yes			No restrictions	Yes	Yes	Yes	Yes
41 to 50	Male		Asian/Asian British/Arabic		Construction/Building		None		Never		I never had Covid-19		I never had Covid-19		No			No			I don't feel any stress due to Covid-19		Yes	None						Don’t know	No	Side effects		Social distancing,Mask wearing	Yes	Yes	Yes	No
31 to 40	Female		White European		Medical (e.g. NHS, Pharmacy)		None		Never		I never had Covid-19		I never had Covid-19		No	No		Yes	Work,Pandemic		Other	Not coping/dealing with it	Yes	Pfizer-BioNTech		No	Tired,Pain in muscle/swelling		Less than 2 weeks	Family	Yes			Mask wearing	Yes	Yes	Yes	No
41 to 50	Female		White British		Medical (e.g. NHS, Pharmacy)		None		Never		I never had Covid-19		I never had Covid-19		No	No		Yes	Work,Pandemic,Childcare/ school closures		Watch movies/TV shows etc.,Excessive use of social media,Speak to family/ friends,Engage in hobbies		Yes	Pfizer-BioNTech		Yes	Tired,Aches/chills,Pain in muscle/swelling		Less than a week	Yourself,Children,Family	Yes			Mask wearing	Yes	Yes	Yes	Yes
31 to 40	Male		Asian/Asian British/Arabic		Other	Restaurant and food	None		Never		I never had Covid-19		I never had Covid-19		No	No	Reduction in fitness	Yes	Work		Sports/Games		Yes	None						Family	Yes			Tier response system,Social distancing	Yes	Yes	Yes	No
21 to 30	Male		Asian/Asian British/Arabic		Other	Technician	None		January 2021 and onwards		I never had Covid-19		I never had Covid-19		Yes	Yes		No			Sports/Games,Speak to family/ friends		Yes	Pfizer-BioNTech		Yes	Tired,Headache,Aches/chills,Pain in muscle/swelling		Less than a week	Family	Yes			Lockdown and observe R rate for longer	No	Yes	Yes	No
60 to 70	Female		White British		Education/Academia		None		Never		I never had Covid-19		I never had Covid-19		No			Yes	Other	isolation-induced anxiety	Speak to family/ friends,Other	Exercise outdoors	Yes	Oxford-AstraZeneca		Yes	Tired,Aches/chills		Less than a week	Yourself,Family	Yes			Social distancing,Mask wearing	No	Yes	No	No
21 to 30	Male		Asian/Asian British/Arabic		Finance services/Banking/Insurance		None		May 2020 to August 2020		Symptoms managed at home		Up to 3 days		No	No	Reduction in fitness	No			I don't feel any stress due to Covid-19		Yes	None		No				Yourself	Yes			Social distancing,Mask wearing	Yes	Yes	Yes	Yes
50 to 60	Male		Asian/Asian British/Arabic		Self employed		A severe lung condition (such as cystic fibrosis, severe asthma or severe COPD),Diabetes		Never		I never had Covid-19		I never had Covid-19		No	No		Yes	Covid-19,Finance		Speak to family/ friends		Yes	Pfizer-BioNTech		Yes	None		Less than a week	Yourself,Children,Family	Yes			Mask wearing	No	Yes	Yes	Yes
21 to 30	Female		White British		Medical (e.g. NHS, Pharmacy)		None		Never		I never had Covid-19		I never had Covid-19		No	No		Yes	Covid-19,Vaccine,Work,Pandemic,Studies/Performance,Finance,Relationships,Other	Loneliness	Watch movies/TV shows etc.,Speak to family/ friends		Yes	Oxford-AstraZeneca		Yes	Tired,Strange feeling,Headache,Aches/chills,Pain in muscle/swelling,Nausea		Less than 2 weeks	Yourself,Children,Family	Yes	History of allergy		Lockdown and observe R rate for longer,Social distancing,Mask wearing	Yes	Yes	Yes	Yes
60 to 70	Female		White British		Education/Academia		None		Never		I never had Covid-19		I never had Covid-19		No			Yes	Relationships		Speak to family/ friends		Yes	Oxford-AstraZeneca		Yes	Headache,Fever		Less than a week	Yourself,Family	Yes			Tier response system,Social distancing,Mask wearing	Yes	Yes	Yes	Yes
41 to 50	Male		Asian/Asian British/Arabic		Other	Information technology	None		Never		I never had Covid-19		I never had Covid-19		No	No		No			I don't feel any stress due to Covid-19		Yes	Oxford-AstraZeneca		Yes	Fever		Less than a week	Yourself	Yes			Social distancing,Mask wearing	No	Yes	Yes	No
31 to 40	Male		White British		Education/Academia		None		Never		I never had Covid-19		I never had Covid-19		No	No		No			Other	Listen to Music	Yes	Pfizer-BioNTech		No	Strange feeling,Headache		Less than a week	Yourself,Children,Family	Yes			Tier response system	Yes	Yes	Yes	Yes
41 to 50	Female		White British		Medical (e.g. NHS, Pharmacy)		None		Jan 2020 to April 2020		Symptoms managed at home		Longer than 14 days		No	No	Sick leave extending longer than self-isolation period	Yes	Relationships,Childcare/ school closures		Sports/Games,Engage in hobbies		Yes	Pfizer-BioNTech		No	Strange feeling,Headache,Fever,Aches/chills,Nausea,Dizziness		Less than a week	Yourself,Family	Yes			Lockdown and observe R rate for longer,Tier response system,Social distancing,Mask wearing	Yes	Yes	No	Yes
41 to 50	Female		White British		Medical (e.g. NHS, Pharmacy)		None		Never		I never had Covid-19		I never had Covid-19		No			Yes	Work,Pandemic,Childcare/ school closures		Watch movies/TV shows etc.,Speak to family/ friends,Engage in hobbies		Yes	Pfizer-BioNTech		Yes	Tired,Aches/chills		Less than a week	Yourself,Children,Family	Yes			No restrictions	Yes	Yes	Yes	Yes
Over 70	Male		White British		Other	Retired garage owner	Diabetes,Obesity		Never		I never had Covid-19		I never had Covid-19		No	No		Yes	Covid-19,Pandemic		Speak to family/ friends,Engage in hobbies		Yes	Oxford-AstraZeneca		Yes	None		Less than a week	Yourself,Children,Family	Yes			Social distancing,Mask wearing	No	Yes	Yes	No
Over 70	Female		White British		Other	Retired	None		Never		I never had Covid-19		I never had Covid-19		No	No		Yes	Covid-19,Relationships		Engage in hobbies		Yes	Pfizer-BioNTech		No	None		Less than a week	Family	Yes			Social distancing	No	Yes	No	Yes
Over 70	Male		White British		Other	retired	None		Never		I never had Covid-19		I never had Covid-19		No	No		No			I don't feel any stress due to Covid-19		Yes	Pfizer-BioNTech		Yes	None		Less than a week	Yourself,Family	Yes			No restrictions	No	Yes	No	No
21 to 30	Female		White British		Medical (e.g. NHS, Pharmacy)		None		Never		I never had Covid-19		I never had Covid-19		No			Yes	Work		Watch movies/TV shows etc.,Speak to family/ friends		Yes	Pfizer-BioNTech		Yes	None		Less than a week	Yourself,Children,Family	Yes			Tier response system,Mask wearing	Yes	Yes	No	Yes
41 to 50	Female		White British		Medical (e.g. NHS, Pharmacy)		None		Never		I never had Covid-19		I never had Covid-19		No			Yes	Childcare/ school closures		Speak to family/ friends		Yes	Oxford-AstraZeneca		Yes	Headache,Aches/chills,Pain in muscle/swelling,Dizziness		Less than a week	Yourself,Children,Family	Yes			No restrictions	Yes	Yes	No	Yes
21 to 30	Female		Asian/Asian British/Arabic		Finance services/Banking/Insurance		None		Never		I never had Covid-19		I never had Covid-19		No	No		Yes	Covid-19,Pandemic		Watch movies/TV shows etc.,Excessive use of social media,Engage in hobbies		Yes	Oxford-AstraZeneca		Yes	Tired,Headache,Fever,Aches/chills,Pain in muscle/swelling,Nausea		Less than a week	Yourself,Family	No	Side effects		Social distancing,Mask wearing	Yes	Yes	Yes	Yes
50 to 60	Male		White British		Medical (e.g. NHS, Pharmacy)		None		Never		I never had Covid-19		I never had Covid-19		No			No			I don't feel any stress due to Covid-19		Yes	Oxford-AstraZeneca		Yes	Tired,Headache		Less than a week	Family	Yes			Tier response system,Social distancing,Mask wearing	No	Yes	No	Yes
Over 70	Male		White British		Other	Social work	Chemotherapy or antibody treatment for cancer, including immunotherapy,Blood or bone marrow cancer (such as leukaemia, lymphoma or myeloma)		Never		I never had Covid-19		I never had Covid-19		No	No		No			Sports/Games,Speak to family/ friends		Yes	Pfizer-BioNTech		Yes	Tired		Less than a week	Yourself,Family	Yes			Tier response system,Social distancing,Mask wearing	Yes	Yes	Yes	No
41 to 50	Female		White British		Medical (e.g. NHS, Pharmacy)		None		May 2020 to August 2020		Symptoms managed at home		Up to 7 days		No	No	Negative impact on relationships	Yes	Pandemic		Engage in hobbies		Yes	Pfizer-BioNTech		No	Pain in muscle/swelling		Less than a week	Yourself,Children,Family	Yes			Tier response system	No	Yes	No	Yes
31 to 40	Female		White British		Medical (e.g. NHS, Pharmacy)		Diabetes		Never		I never had Covid-19		I never had Covid-19		No			Yes	Relationships		Excessive use of social media,Engage in hobbies		Yes	Pfizer-BioNTech		Yes	Tired,Headache,Fever,Aches/chills,Pain in muscle/swelling,Dizziness,Enlarged lymph nodes		Less than a week	Yourself,Family	Yes			No restrictions	Yes	Yes	Yes	No
60 to 70	Male		White British		Other	Retired	None		Never		I never had Covid-19		I never had Covid-19		No	No		Yes	Covid-19		Speak to family/ friends		Yes	Oxford-AstraZeneca		Yes	Tired,Headache		Less than a week	Yourself,Children,Family	Yes			Tier response system	Yes	Yes	Yes	Yes
60 to 70	Male		White British		Other	Retired swimming instructor	None		Never		I never had Covid-19		I never had Covid-19		No		Negative impact on relationships	Yes	Pandemic,Relationships		Sports/Games,Engage in hobbies		Yes	Oxford-AstraZeneca		Yes	Pain in muscle/swelling		Less than a week	Yourself,Children,Family	Yes			Tier response system,Social distancing,Mask wearing	Yes	Yes	Yes	Yes
60 to 70	Female		White British		Other	Retired Civil Servant	On medicine that makes you much more likely to get infections (such as high doses of steroids or immunosuppressant medicine)		Never		I never had Covid-19			Never had Covid	No	No		Yes	Pandemic		Watch movies/TV shows etc.,Other	Had counselling privately	Yes	Pfizer-BioNTech		Yes	Pain in muscle/swelling		Less than a week	Yourself,Children,Family	Yes			Lockdown and observe R rate for longer,Tier response system,Social distancing,Mask wearing	Yes	Yes	Yes	No
Over 70	Male		White British		Other	Energy sector	None		Never		I never had Covid-19		I never had Covid-19		No	No		Yes	Other	Lockdown/ not seeing anyone	Other	Read and odd jobs around the house	Yes	Pfizer-BioNTech		Yes	Tired,Headache,Pain in muscle/swelling		Less than 2 weeks	Yourself	Yes			Tier response system,Mask wearing	Yes	Yes	No	Yes
50 to 60	Female		White British		Education/Academia		A severe lung condition (such as cystic fibrosis, severe asthma or severe COPD)		Never		I never had Covid-19		I never had Covid-19		No	No		No	Covid-19		I don't feel any stress due to Covid-19		Yes	Oxford-AstraZeneca		Yes	Tired,Headache		Less than a week	Yourself,Children	Yes			Lockdown and observe R rate for longer,Tier response system	Yes	Yes	Yes	Yes
41 to 50	Female		White British		Education/Academia		None		Never		I never had Covid-19		I never had Covid-19		No			No			I don't feel any stress due to Covid-19		Yes	Oxford-AstraZeneca		Yes	Tired,Strange feeling,Headache,Aches/chills,Pain in muscle/swelling		Less than a week	Yourself,Children,Family	Yes			Tier response system,Social distancing	No	Yes	No	Yes
50 to 60	Male		White European		Education/Academia		None		Never		I never had Covid-19		I never had Covid-19		No			No			I don't feel any stress due to Covid-19		Yes	Oxford-AstraZeneca		No	Tired,Fever,Pain in muscle/swelling		Less than a week	Yourself,Children,Family	Yes			No restrictions	Yes	Yes	No	No
41 to 50	Female		White British		Education/Academia		None		Never		I never had Covid-19		I never had Covid-19		No	No		Yes	Pandemic,Childcare/ school closures		Speak to family/ friends,Engage in hobbies		Yes	Oxford-AstraZeneca		Yes	Tired,Strange feeling,Headache,Fever,Aches/chills,Nausea,Dizziness		Less than a week	Yourself,Children,Family	Yes			Tier response system,Social distancing,Mask wearing	Yes	Yes	Yes	Yes
60 to 70	Male		White British		Education/Academia		None		January 2021 and onwards		Asymptomatic			no symptoms	No		Negative impact on mental health	Yes	Other	being unable to come to work	Other	walk	Yes	Oxford-AstraZeneca		Yes	None		Less than a week	Yourself,Children,Family	Yes			No restrictions	No	Yes	No	No
50 to 60	Male		White British		Education/Academia		None		Never		I never had Covid-19		I never had Covid-19		No	No		No	Relationships		Speak to family/ friends		Yes	Oxford-AstraZeneca		Yes	None		Less than a week	Don’t know	Yes			Tier response system	Yes	Yes	No	No
31 to 40	Female		Other	White/Arabic	Education/Academia		None		Never		I never had Covid-19		I never had Covid-19		No			No			I don't feel any stress due to Covid-19		Yes	Pfizer-BioNTech		No	Tired,Headache		Less than a week	Yourself,Family	Yes			No restrictions	Yes	Yes	No	Yes
41 to 50	Female		White British		Education/Academia		None		Never		I never had Covid-19		I never had Covid-19		No	No		Yes	Vaccine		Watch movies/TV shows etc.,Engage in hobbies		Yes	Oxford-AstraZeneca		Yes	Strange feeling,Headache,Pain in muscle/swelling		Over 2 weeks	Yourself,Children,Family	Yes			Tier response system	Yes	Yes	Yes	Yes
31 to 40	Male		White British		Education/Academia		None		Never		I never had Covid-19		I never had Covid-19		No			No			Sports/Games		Yes	Pfizer-BioNTech		No	None		Less than a week	Yourself,Children,Family	Yes			Tier response system,Mask wearing	No	Yes	No	Yes
41 to 50	Female		Other	White and Chinese	Education/Academia		Obesity		Never		I never had Covid-19		I never had Covid-19		No	No		Yes	Pandemic		Engage in hobbies		Yes	Oxford-AstraZeneca		Yes	Pain in muscle/swelling,Itchy skin/rash		Less than a week	Yourself,Family	Yes			Tier response system,Social distancing,Mask wearing	Yes	Yes	Yes	No
50 to 60	Male		White British		Education/Academia		None		Never		I never had Covid-19		I never had Covid-19		No			Yes	Work,Childcare/ school closures		Sports/Games,Other	exercise	Yes	Oxford-AstraZeneca		No	Tired,Headache,Aches/chills,Pain in muscle/swelling		Less than a week	Yourself,Children	Yes			Social distancing,Mask wearing	No	Yes	Yes	Yes
60 to 70	Male		White British		Education/Academia		None		Never		I never had Covid-19		I never had Covid-19		No			Yes	Covid-19,Work,Pandemic		Watch movies/TV shows etc.,Sports/Games,Speak to family/ friends,Engage in hobbies		Yes	Oxford-AstraZeneca		No	Tired,Headache,Aches/chills		Less than a week	Yourself,Children,Family	Yes			Tier response system	Yes	Yes	Yes	Yes
50 to 60	Male		Chinese		Education/Academia		None		Never		I never had Covid-19		I never had Covid-19		No			No			I don't feel any stress due to Covid-19		Yes	Oxford-AstraZeneca		Yes	Aches/chills,Pain in muscle/swelling		Less than a week	Yourself,Family	Yes			No restrictions	Yes	Yes	No	Yes
60 to 70	Female		White British		Education/Academia		Other	Stage 3 kidney disease	Never		I never had Covid-19		I never had Covid-19		No			Yes	Covid-19,Work,Pandemic		Watch movies/TV shows etc.,Engage in hobbies		Yes	Pfizer-BioNTech		Yes	None		Less than a week	Yourself,Children,Family	Yes			Lockdown and observe R rate for longer,Social distancing,Mask wearing	Yes	Yes	Yes	Yes
31 to 40	Female		White British		Education/Academia		None		Never		I never had Covid-19		I never had Covid-19		No	No		Yes	Work,Pandemic		Watch movies/TV shows etc.,Speak to family/ friends,Other	read, play computer games	Yes	None						Yourself,Family	Yes			Social distancing,Mask wearing	Yes	Yes	No	Yes
31 to 40	Female		White British		Education/Academia		None		Never		Symptoms requiring GP appointment/ 111 advice		Up to 14 days		No	No	Sick leave extending longer than self-isolation period	No			Watch movies/TV shows etc.,Speak to family/ friends		Yes	None						None	No	Side effects,Personal beliefs		No restrictions	Yes	Yes	No	Yes
41 to 50	Male		White British		Education/Academia		None		Never		I never had Covid-19		I never had Covid-19		No	No		Yes	Covid-19,Work,Pandemic		Watch movies/TV shows etc.,Sports/Games,Engage in hobbies		Yes	Oxford-AstraZeneca		Yes	Tired,Aches/chills,Pain in muscle/swelling		Less than a week	Yourself,Children,Family	Yes			Tier response system,Social distancing	Yes	Yes	No	Yes
31 to 40	Male		White British		Education/Academia		Obesity		Never		I never had Covid-19		I never had Covid-19		No	No		Yes	Covid-19,Work,Pandemic		Engage in hobbies,Other	Get out more with my family and enjoy walks and excercise	Yes	Oxford-AstraZeneca		Yes	Tired,Aches/chills		Less than a week	Yourself,Children,Family	Yes			Lockdown and observe R rate for longer,Tier response system,Social distancing,Mask wearing	Yes	Yes	No	Yes
50 to 60	Male		White British		Education/Academia		None		Never		I never had Covid-19		I never had Covid-19		No	No		Yes	Work,Pandemic		Speak to family/ friends,Engage in hobbies		Yes	Oxford-AstraZeneca		Yes	Aches/chills,Other	sore arm	Less than a week	Yourself,Children,Family	Yes			Social distancing,No restrictions	No	Yes	No	Yes
41 to 50	Male		White British		Education/Academia		None		Never		I never had Covid-19		I never had Covid-19		No			No			Sports/Games		Yes	Oxford-AstraZeneca		No	Tired,Fever,Aches/chills		Less than a week	Yourself,Children,Family	Yes			Social distancing,Mask wearing	No	Yes	Yes	Yes
50 to 60	Male		White British		Education/Academia		None		Never		I never had Covid-19		I never had Covid-19		No	No		Yes	Childcare/ school closures		Other	Need to get out of house away from 5yr old I was trying to home school. Went back to basic and concentrated on key curriculum subjects	Yes	Oxford-AstraZeneca		Yes	Aches/chills		Less than a week	Yourself,Children,Family	Yes			No restrictions	No	Yes	Yes	Yes
41 to 50	Female		White British		Education/Academia		None		Never		Asymptomatic			My husband tested positive and my son was sent home from school as there were a few positive cases in his year group. My son and I felt unwell for about 4 daysbut weren't positive (at the time of testing)	No			Yes	Childcare/ school closures		Sports/Games,Speak to family/ friends		Yes	Oxford-AstraZeneca		Yes	Tired,Headache,Fever,Aches/chills,Pain in muscle/swelling,Dizziness,Enlarged lymph nodes		Less than 2 weeks	Yourself,Children,Family	Yes			Tier response system	Yes	Yes	No	Yes
41 to 50	Female		White British		Education/Academia		None		Never		I never had Covid-19		I never had Covid-19		No			Yes	Work,Childcare/ school closures		Sports/Games,Speak to family/ friends,Engage in hobbies		Yes	Oxford-AstraZeneca		No	Fever		Less than a week	Yourself,Children,Family	Yes			Tier response system,Social distancing,Mask wearing	Yes	Yes	Yes	Yes
50 to 60	Female		White British		Education/Academia		None		Never		I never had Covid-19		I never had Covid-19		No			Yes	Work		Watch movies/TV shows etc.,Speak to family/ friends,Engage in hobbies		Yes	Oxford-AstraZeneca		Yes	Aches/chills		Less than a week	Yourself,Children,Family	Yes			Mask wearing	Yes	Yes	Yes	Yes
41 to 50	Female		White British		Education/Academia		None		Sept 2020 to December 2020		Symptoms managed at home		Up to 14 days		No		Reduction in fitness	Yes	Childcare/ school closures		Engage in hobbies		Yes	Oxford-AstraZeneca		Yes	Tired,Headache,Fever,Aches/chills		Less than a week	Family	Yes			Social distancing	Yes	Yes	No	Yes
21 to 30	Female		White British		Education/Academia		None		Never		I never had Covid-19		I never had Covid-19		No			Yes	Pandemic		Speak to family/ friends		Yes	Pfizer-BioNTech		Yes	Pain in muscle/swelling		Less than a week	Yourself,Children,Family	Yes			Social distancing	Yes	Yes	No	Yes
60 to 70	Female		White British		Education/Academia		None		Never		I never had Covid-19		I never had Covid-19		No	No		No			I don't feel any stress due to Covid-19		Yes	Oxford-AstraZeneca		No	Tired		Less than a week	Yourself,Children,Family	Yes			No restrictions	Yes	Yes	No	Yes
50 to 60	Male		White British		Education/Academia		None		Never		I never had Covid-19		I never had Covid-19		No			No			I don't feel any stress due to Covid-19		Yes	Oxford-AstraZeneca		No	Tired,Aches/chills		Less than a week	Yourself,Children,Family	Yes			No restrictions	Yes	Yes	No	Yes
41 to 50	Male		White British		Education/Academia		None		Never		I never had Covid-19		I never had Covid-19		No	No		Yes	Covid-19,Work,Pandemic,Childcare/ school closures		Engage in hobbies		Yes	Oxford-AstraZeneca		No	Tired,Headache		Less than a week	Yourself,Family	Yes			Tier response system,Social distancing,Mask wearing	Yes	Yes	Yes	Yes
60 to 70	Female		White British		Education/Academia		None		Never		I never had Covid-19		I never had Covid-19		No	No		No			I don't feel any stress due to Covid-19		Yes	Oxford-AstraZeneca		Yes	None		Less than a week	Yourself,Children,Family	Yes			No restrictions	No	Yes	No	No
50 to 60	Female		White British		Education/Academia		None		Never		I never had Covid-19		I never had Covid-19		No	No		Yes	Covid-19,Work		Other	Walking	Yes	Oxford-AstraZeneca		No	Tired,Headache,Fever,Aches/chills		Less than a week	Yourself,Children,Family	Yes			Social distancing,Mask wearing	No	Yes	Yes	Yes
50 to 60	Female		White British		Finance services/Banking/Insurance		A severe lung condition (such as cystic fibrosis, severe asthma or severe COPD),Obesity		Never		I never had Covid-19		I never had Covid-19		No			No			Watch movies/TV shows etc.,Speak to family/ friends,Engage in hobbies		Yes	Oxford-AstraZeneca		Yes	Headache,Aches/chills		Less than a week	Yourself,Children,Family	Yes			No restrictions	Yes	Yes	No	Yes
50 to 60	Female		White British		Education/Academia		None		Never		I never had Covid-19		I never had Covid-19		No			No			I don't feel any stress due to Covid-19		Yes	Oxford-AstraZeneca		No	None		Less than a week	Family	Yes			Tier response system,Mask wearing	No	Yes	No	Yes
41 to 50	Male		White British		Education/Academia		None		Never		I never had Covid-19		I never had Covid-19		No			Yes	Covid-19,Work,Pandemic,Childcare/ school closures		Watch movies/TV shows etc.,Engage in hobbies		Yes	Oxford-AstraZeneca		No	Tired,Strange feeling,Headache,Fever,Aches/chills,Nausea,Dizziness		Less than a week	Yourself,Children,Family	No	Other	Until all adults are vaccinated and variants are addressed we wont be able to safely return to our previous lives.	Lockdown and observe R rate for longer,Social distancing,Mask wearing	Yes	Yes	Yes	Yes
21 to 30	Female		White British		Education/Academia		None		Never		I never had Covid-19		I never had Covid-19		No			Yes	Covid-19,Work,Pandemic,Relationships		Watch movies/TV shows etc.,Speak to family/ friends		Yes	None						Yourself,Family	Yes			No restrictions	Yes	Yes	No	Yes
41 to 50	Male		White British		Education/Academia		None		Never		Symptoms managed at home		Longer than 14 days		No		Reduction in fitness	Yes	Work,Studies/Performance,Relationships		Watch movies/TV shows etc.,Excessive use of social media,Speak to family/ friends		Yes	Oxford-AstraZeneca		No	Aches/chills		Less than a week	Yourself,Children,Family	Yes			Social distancing	Yes	Yes	No	No
41 to 50	Male		White British		Education/Academia		None		January 2021 and onwards		I never had Covid-19		I never had Covid-19		No			No			Watch movies/TV shows etc.		Yes	Oxford-AstraZeneca		Yes	Tired,Headache,Aches/chills		Less than a week	Yourself,Children,Family	Yes			Social distancing,Mask wearing	Yes	Yes	Yes	Yes
50 to 60	Male		White British		Education/Academia		None		Never		I never had Covid-19		I never had Covid-19		No			No			I don't feel any stress due to Covid-19		Yes	Pfizer-BioNTech		No	Pain in muscle/swelling,Enlarged lymph nodes		Less than a week	Yourself,Children,Family	Yes			Lockdown and observe R rate for longer,Tier response system,Social distancing,Mask wearing	Yes	Yes	Yes	Yes
41 to 50	Female		White European		Education/Academia		None		Never			I have never been tested positive for Covid 19	I never had Covid-19		No			Yes	Vaccine,Work,Pandemic,Relationships		Watch movies/TV shows etc.,Sports/Games,Speak to family/ friends		Yes	Oxford-AstraZeneca		Yes	Tired,Headache,Fever,Aches/chills,Pain in muscle/swelling		Less than a week	Yourself,Children,Family	No	Side effects,Other	The fact that they have given me Astrazeneca makes me particularly anxious	Mask wearing	No	Yes	Yes	No
60 to 70	Female		White British		Other	Administrative	On medicine that makes you much more likely to get infections (such as high doses of steroids or immunosuppressant medicine)		Never		I never had Covid-19		I never had Covid-19		No	No		Yes	Vaccine,Work,Pandemic,Relationships		Watch movies/TV shows etc.,Engage in hobbies		Yes	Pfizer-BioNTech		No	None		Less than a week	Family	Yes			Social distancing,Mask wearing	Yes	Yes	Yes	Yes
31 to 40	Male		White British		Education/Academia		None		Never		I never had Covid-19		I never had Covid-19		No	No		No			I don't feel any stress due to Covid-19		Yes	Oxford-AstraZeneca		No	None		Less than a week	Yourself,Family	Yes			No restrictions	No	Yes	No	Yes
50 to 60	Female		White British		Education/Academia		None		Never		I never had Covid-19		I never had Covid-19		No			Yes	Work		Engage in hobbies		Yes	Oxford-AstraZeneca		No	Tired,Headache,Aches/chills		Less than a week	Yourself	Yes			Mask wearing	Yes	Yes	No	Yes
41 to 50	Female		White British		Education/Academia		Obesity		Never		I never had Covid-19		I never had Covid-19		No	No		Yes	Work,Pandemic,Childcare/ school closures,Other	Worrying about Mum as suffers with terminal lung condition	Watch movies/TV shows etc.,Other	Medication	Yes	Oxford-AstraZeneca		No	Tired,Headache,Other	Left side only felt achy	Less than a week	Yourself,Children,Family	Yes			Lockdown and observe R rate for longer,Tier response system,Social distancing	Yes	Yes	Yes	Yes
60 to 70	Female		White British		Education/Academia		None		Never		I never had Covid-19		I never had Covid-19		No	No		No			Engage in hobbies		Yes	Oxford-AstraZeneca		No	None		Less than a week	Yourself	Yes			Tier response system,Social distancing,Mask wearing	Yes	Yes	Yes	No
50 to 60	Female		White British		Education/Academia		Diabetes		Never		I never had Covid-19		I never had Covid-19		No			Yes	Work,Pandemic,Relationships		Watch movies/TV shows etc.,Speak to family/ friends		Yes	Pfizer-BioNTech		Yes	Pain in muscle/swelling		Less than a week	Yourself,Children,Family	Yes			Tier response system	Yes	Yes	Yes	Yes
50 to 60	Female		White British		Finance services/Banking/Insurance		None		Never		I never had Covid-19		I never had Covid-19		No	No		Yes	Work		Sports/Games		Yes	Oxford-AstraZeneca		No	Fever,Pain in muscle/swelling		Less than a week	Family	Yes			Tier response system,Social distancing,Mask wearing	Yes	Yes	Yes	Yes
60 to 70	Female		White British		Education/Academia		Other	ME Coeliac disease hypertension	Never		I never had Covid-19		I never had Covid-19		No			Yes	Work		Other	keep trying to catch up with endless work on line especially where higher levels don't appreciate that time is spent teaching on line, learning new on-line delivery media, supporting students who are more anxious, need more tutorials for assignments, I could go on	Yes	None						None	No	Other	not enough research about the specific effects for one of my considtions. Currently showing the second dose might trigger adverse eeffects	No restrictions	No	Yes	No	No
60 to 70	Male		White British		Education/Academia		None		Never		I never had Covid-19		I never had Covid-19		No			No			I don't feel any stress due to Covid-19		Yes	Pfizer-BioNTech		No	Pain in muscle/swelling		Less than a week	Yourself,Children,Family	Yes			No restrictions	No	Yes	No	No
41 to 50	Female		White British		Finance services/Banking/Insurance		None		Never		I never had Covid-19		I never had Covid-19		No			No			I don't feel any stress due to Covid-19		Yes	Oxford-AstraZeneca		No	Strange feeling,Headache,Fever,Aches/chills,Pain in muscle/swelling,Nausea,Dizziness,Other	upset stomach	Less than a week	Yourself,Children,Family	Yes			Social distancing,Mask wearing	No	Yes	Yes	Yes
60 to 70	Male		White British		Education/Academia		None		Sept 2020 to December 2020		Symptoms managed at home		Up to 7 days		No	No	Reduction in fitness	Yes	Covid-19		Watch movies/TV shows etc.		Yes	Oxford-AstraZeneca		Yes	Headache,Fever,Pain in muscle/swelling		Less than a week	Yourself,Children,Family	Yes			No restrictions	No	Yes	Yes	No
50 to 60	Female		White British		Education/Academia		Blood or bone marrow cancer (such as leukaemia, lymphoma or myeloma)		Never		I never had Covid-19		I never had Covid-19		No	No		No			Watch movies/TV shows etc.,Speak to family/ friends,Other	Walk dog	Yes	Pfizer-BioNTech		Yes	Tired		Less than a week	Yourself,Children,Family	Yes			Tier response system	Yes	Yes	Yes	Yes
41 to 50	Female		White British		Education/Academia		Obesity		Never		I never had Covid-19		I never had Covid-19		No			Yes	Work		Engage in hobbies,Other	Spend time outdoors, spend time with my cat	Yes	Oxford-AstraZeneca		Yes	Tired		Less than a week	Yourself,Children,Family	Yes			Social distancing,Mask wearing	No	Yes	Yes	Yes
60 to 70	Female		White British		Education/Academia		Other	Autoimmune - myasthenia gravis	Never		I never had Covid-19		I never had Covid-19		No			Yes	Pandemic		Watch movies/TV shows etc.,Speak to family/ friends,Engage in hobbies,Other	Read the Bible and pray	Yes	Oxford-AstraZeneca		No	Tired,Headache,Aches/chills,Nausea		Less than a week	Yourself,Children,Family	Yes			Tier response system,Social distancing	No	Yes	Yes	Yes
50 to 60	Female		White British		Education/Academia		None		Never		I never had Covid-19		I never had Covid-19		No			Yes	Covid-19,Pandemic		Watch movies/TV shows etc.,Engage in hobbies		Yes	Oxford-AstraZeneca		Yes	Tired,Strange feeling		Less than a week	Yourself,Children,Family	Yes			Tier response system,Social distancing,Mask wearing	No	Yes	Yes	Yes
50 to 60	Female		White British		Education/Academia		Other	glaucoma	Never		I never had Covid-19		I never had Covid-19		No	No		Yes	Vaccine		Other	Yoga	Yes	Oxford-AstraZeneca		No	Tired,Strange feeling,Headache		Less than a week	None	No	Side effects,Other	That there is no test for anti-bodies before vaccination. doesn't make sense	Tier response system	No	Yes	Yes	Yes
41 to 50	Female		White British		Finance services/Banking/Insurance		Obesity		Never		I never had Covid-19		I never had Covid-19		No			Yes	Covid-19		Watch movies/TV shows etc.,Excessive use of social media,Speak to family/ friends,Engage in hobbies,Other	walking	Yes	Oxford-AstraZeneca		Yes	Tired,Aches/chills		Less than a week	Yourself,Children,Family	Yes			Tier response system,Social distancing,Mask wearing	Yes	Yes	Yes	No
41 to 50	Male		White British		Education/Academia		None		Never		I never had Covid-19		I never had Covid-19		No			No			I don't feel any stress due to Covid-19		Yes	Oxford-AstraZeneca		No	Tired,Aches/chills		Less than a week	Yourself,Children,Family	Yes			Tier response system,Social distancing,Mask wearing	No	Yes	No	Yes
41 to 50	Female		White British		Education/Academia		Other	kidney stones	Never		I never had Covid-19		I never had Covid-19		No			Yes	Covid-19,Work,Finance,Relationships,Childcare/ school closures		Watch movies/TV shows etc.,Excessive use of social media,Speak to family/ friends,Engage in hobbies		Yes	Oxford-AstraZeneca		No	Tired,Headache,Aches/chills,Pain in muscle/swelling,Nausea,Other	bad taste in mouth	Less than a week	Yourself,Family	Yes			Tier response system,Social distancing	Yes	Yes	Yes	Yes
50 to 60	Female		White European		Education/Academia		None		Never		I never had Covid-19		I never had Covid-19		No			No			I don't feel any stress due to Covid-19		Yes	Oxford-AstraZeneca		No	None		Less than a week	Don’t know	Yes			Lockdown and observe R rate for longer,Social distancing,Mask wearing	No	Yes	No	No
60 to 70	Female		White British		Education/Academia		None		Never		I never had Covid-19		I never had Covid-19		No	No		Yes	Covid-19		Engage in hobbies		Yes	Oxford-AstraZeneca		Yes	Tired,None		Less than a week	Family,Don’t know	Yes			Lockdown and observe R rate for longer,Social distancing,Mask wearing	Yes	Yes	Yes	Yes
41 to 50	Female		White European		Education/Academia		None		Sept 2020 to December 2020		Symptoms managed at home		Longer than 14 days		No	No	Sick leave extending longer than self-isolation period,Reduction in fitness	Yes	Covid-19,Work,Pandemic,Childcare/ school closures		Excessive use of social media		Yes	Oxford-AstraZeneca		No	Tired,Headache,Fever,Aches/chills,Pain in muscle/swelling,Nausea,Dizziness		Less than 2 weeks	Family	Yes	Side effects		Tier response system	Yes	Yes	No	Yes
21 to 30	Male		White European		Education/Academia		Obesity		Never		Symptoms managed at home		Longer than 14 days		No	No	Reduction in fitness	Yes	Work,Relationships		Watch movies/TV shows etc.,Excessive use of social media		Yes	Pfizer-BioNTech		No	None		Less than a week	Yourself,Children,Family	Yes			No restrictions	Yes	No	Yes	No
50 to 60	Female		White British		Education/Academia		None		Never		I never had Covid-19		I never had Covid-19		No	No		No	Studies/Performance,Childcare/ school closures		Speak to family/ friends		Yes	Oxford-AstraZeneca		No	Headache,Aches/chills,Pain in muscle/swelling		Less than a week	Don’t know	No	Side effects		No restrictions	No	Yes	No	No
50 to 60	Female		White British		Education/Academia		A problem with your spleen or your spleen has been removed (splenectomy)		Never		I never had Covid-19		I never had Covid-19		No	No		Yes	Other	Cancer diagnosis and treatment during covid 19	Other	Walking/being outside	Yes	Oxford-AstraZeneca		Yes	Tired,Aches/chills,Other	High temperature	Less than a week	Yourself,Children,Family	Yes			Mask wearing,No restrictions	Yes	Yes	Yes	Yes
41 to 50	Female		White British		Education/Academia		Obesity		Never		I never had Covid-19		I never had Covid-19		No			Yes	Work,Childcare/ school closures		Other	Drink wine!	Yes	Pfizer-BioNTech		No	Tired,Aches/chills		Less than a week	Yourself,Children,Family	Yes			Social distancing	Yes	Yes	Yes	No
50 to 60	Female		White British		Education/Academia		None		Never		I never had Covid-19		I never had Covid-19		No	No		Yes	Pandemic		Watch movies/TV shows etc.,Excessive use of social media,Speak to family/ friends		Yes	Oxford-AstraZeneca		No	Headache,Fever,Aches/chills,Pain in muscle/swelling,Nausea		Less than a week	Family	No	Other	worried about the new variants	Lockdown and observe R rate for longer,Tier response system,Social distancing,Mask wearing	Yes	Yes	Yes	Yes
60 to 70	Female		White British		Education/Academia		Obesity		Never		I never had Covid-19		I never had Covid-19		No			Yes	Pandemic		Speak to family/ friends		Yes	Pfizer-BioNTech		No	Tired,Headache,Aches/chills,Pain in muscle/swelling,Other	Stomach ache. diarrhoea	Less than a week	Yourself,Children,Family	No	Other	Asthma, tho not chronic, makes me fear Covid even after vaccination.	Social distancing,Mask wearing	No	Yes	Yes	Yes
31 to 40	Male		White European		Education/Academia		Obesity		Never		I never had Covid-19		I never had Covid-19		No	No		Yes	Covid-19,Work,Pandemic,Studies/Performance,Relationships		Other	I eat my feelings	Yes	Pfizer-BioNTech		No	Tired		Less than a week	Yourself	Yes			Lockdown and observe R rate for longer,Tier response system,Social distancing,Mask wearing	No	Yes	Yes	No
50 to 60	Female		White British		Education/Academia		None		Never		I never had Covid-19		I never had Covid-19		No			Yes	Other	Control of society	Sports/Games		Yes	Pfizer-BioNTech		Yes	None		Over 2 weeks	Yourself,Children,Family	No	Side effects		Tier response system,Social distancing,Mask wearing	No	Yes	No	Yes
41 to 50	Female		White British		Education/Academia		None		Never		I never had Covid-19		I never had Covid-19		No	No		Yes	Work		Watch movies/TV shows etc.		Yes	Oxford-AstraZeneca		Yes	Aches/chills		Less than a week	Yourself,Children,Family	Yes			Tier response system	Yes	Yes	No	No
41 to 50	Male		White British		Education/Academia		None		Never		I never had Covid-19		I never had Covid-19		No			Yes	Pandemic,Finance,Childcare/ school closures		Watch movies/TV shows etc.,Sports/Games,Speak to family/ friends,Engage in hobbies		Yes	Oxford-AstraZeneca		Yes	Headache,Aches/chills		Less than a week	Yourself,Children,Family	Yes			Tier response system	Yes	Yes	No	Yes
31 to 40	Male		White European		Education/Academia		None		Never		I never had Covid-19		I never had Covid-19		No			No			I don't feel any stress due to Covid-19		Yes	Oxford-AstraZeneca		No	None		Less than a week	Yourself,Family	Yes			Social distancing,Mask wearing	No	Yes	Yes	No
21 to 30	Female		Black, African, Caribbean or Black British		Education/Academia		None		Never		I never had Covid-19		I never had Covid-19		No	No		Yes	Covid-19		Watch movies/TV shows etc.		Yes	None						Yourself,Children,Family	No	Side effects,History of allergy,Needle-phobia		Tier response system	Yes	Yes	Yes	No
60 to 70	Male		White British		Education/Academia		None		Never		I never had Covid-19		I never had Covid-19		No			Yes	Pandemic		Other	Go hiking	Yes	Oxford-AstraZeneca		No	Tired,Headache,Aches/chills,Pain in muscle/swelling		Less than a week	Yourself,Family	Yes			Mask wearing	Yes	Yes	No	Yes
31 to 40	Male		White British		Education/Academia		None		Never		I never had Covid-19		I never had Covid-19		No			Yes	Vaccine,Work		Watch movies/TV shows etc.,Engage in hobbies		Yes	Pfizer-BioNTech		Yes	None		Less than a week	Yourself,Children,Family	Yes			Tier response system,Mask wearing	Yes	Yes	Yes	Yes
41 to 50	Male		White British		Education/Academia		None		Never		I never had Covid-19		I never had Covid-19		No			Yes	Childcare/ school closures		Other	Just get on with it.	Yes	Oxford-AstraZeneca		No	Fever		Less than a week	Yourself,Children,Family	Yes			Mask wearing	No	Yes	No	No
31 to 40	Female		White European		Education/Academia		None		Never		I never had Covid-19		I never had Covid-19		No			Yes	Covid-19,Work,Pandemic		Watch movies/TV shows etc.,Sports/Games,Speak to family/ friends		Yes	Oxford-AstraZeneca		No	Headache		Less than a week	Yourself,Family	Yes			Social distancing,Mask wearing	Yes	Yes	Yes	Yes
41 to 50	Male		White British		Education/Academia		None		Never		I never had Covid-19		I never had Covid-19		No			Yes	Work,Pandemic,Childcare/ school closures		Sports/Games		Yes	Oxford-AstraZeneca		No	Tired,Headache,Fever,Aches/chills,Nausea		Less than a week	Yourself,Children,Family	No	Other	Its effectiveness having only had one dose	Tier response system,Social distancing,Mask wearing	No	Yes	No	Yes
50 to 60	Male		White British		Education/Academia		None		Never		I never had Covid-19		I never had Covid-19		No	No		Yes	Work		Watch movies/TV shows etc.,Sports/Games,Speak to family/ friends,Engage in hobbies		Yes	Pfizer-BioNTech		Yes	None		Less than a week	Yourself,Family	Yes			No restrictions	Yes	Yes	No	Yes
41 to 50	Female		White British		Education/Academia		None		Never		I never had Covid-19		I never had Covid-19		No			Yes			Watch movies/TV shows etc.		Yes	Oxford-AstraZeneca		Yes	Tired,Headache,Fever,Aches/chills		Less than a week	Yourself,Children,Family	Yes			Social distancing	Yes	Yes	Yes	Yes
41 to 50	Male		White British		Education/Academia		None		Never		I never had Covid-19		I never had Covid-19		No	No		Yes	Work,Pandemic,Other	Lockdown	Engage in hobbies		Yes	Oxford-AstraZeneca		No	None		Less than a week	Yourself,Children,Family	No	Side effects		No restrictions	Yes	Yes	Yes	Yes
50 to 60	Female		White British		Education/Academia		None		Sept 2020 to December 2020		Symptoms managed at home		Longer than 14 days		Yes	No	Reduction in fitness,Negative impact on mental health	Yes	Covid-19		Speak to family/ friends,Engage in hobbies		Yes	Oxford-AstraZeneca		No	Headache,Pain in muscle/swelling		Less than a week	Yourself,Family	Yes			Tier response system,No restrictions	No	Yes	No	No
50 to 60	Male		White British		Education/Academia		None		Never		I never had Covid-19		I never had Covid-19		No	No		Yes	Covid-19,Work		Sports/Games,Engage in hobbies,Other	Walking and Cycling	Yes	Oxford-AstraZeneca		No	None		Less than a week	Yourself,Family	Yes			Tier response system,Social distancing,Mask wearing	Yes	Yes	Yes	Yes
50 to 60	Female		White British		Education/Academia		None		Never		I never had Covid-19		I never had Covid-19		No			Yes	Pandemic,Finance		Speak to family/ friends		Yes	Pfizer-BioNTech		Yes	Tired		Less than a week	Yourself,Children,Family	Yes			No restrictions	Yes	Yes	Yes	No
50 to 60	Female		White British		Education/Academia		None		Never		I never had Covid-19		I never had Covid-19		No	No		Yes	Covid-19		Excessive use of social media		Yes	Pfizer-BioNTech		Yes	Tired,Strange feeling,Headache,Fever,Dizziness,Itchy skin/rash		Less than 2 weeks	Yourself,Children,Family	Yes			Tier response system	Yes	Yes	Yes	Yes
50 to 60	Female		White European		Education/Academia		None		Never		I never had Covid-19		I never had Covid-19		No			Yes	Other	caring for parents	Watch movies/TV shows etc.,Speak to family/ friends,Engage in hobbies,Other	listen to music	Yes	Oxford-AstraZeneca		No	Tired,Strange feeling,Headache,Fever,Aches/chills,Pain in muscle/swelling,Dizziness		Over 2 weeks	Yourself,Family	Yes	Side effects		Mask wearing,No restrictions	No	Yes	No	Yes
60 to 70	Male		White British		Construction/Building		Chemotherapy or antibody treatment for cancer, including immunotherapy,Targeted cancer treatments that can affect the immune system (such as protein kinase inhibitors or PARP inhibitors),Blood or bone marrow cancer (such as leukaemia, lymphoma or myeloma)		Never		I never had Covid-19		I never had Covid-19		No	No		No			Speak to family/ friends		Yes	Oxford-AstraZeneca		Yes	Tired,Aches/chills,Pain in muscle/swelling		Less than a week	Yourself,Children,Family	Yes			Lockdown and observe R rate for longer	Yes	Yes	Yes	Yes
41 to 50	Female		White British		Finance services/Banking/Insurance		None		Never		I never had Covid-19		I never had Covid-19		No			No			Watch movies/TV shows etc.,Speak to family/ friends		Yes	Pfizer-BioNTech		Yes	Tired,Pain in muscle/swelling		Less than a week	Yourself,Children,Family	Yes			No restrictions	Yes	Yes	Yes	Yes
41 to 50	Female		White British		Education/Academia		None		Sept 2020 to December 2020		Symptoms managed at home		Up to 7 days		No		Reduction in fitness	Yes	Covid-19		Sports/Games,Speak to family/ friends		Yes	Oxford-AstraZeneca		Yes	Tired,Strange feeling,Aches/chills,Dizziness		Less than a week	Yourself,Children,Family	Yes			Social distancing	No	Yes	No	Yes
41 to 50	Female		White British		Education/Academia		None		Never		I never had Covid-19		I never had Covid-19		No			Yes	Work,Relationships,Childcare/ school closures		I don't feel any stress due to Covid-19		Yes	Oxford-AstraZeneca		No	Strange feeling,Aches/chills,Pain in muscle/swelling		Less than a week	Yourself,Family	Yes			Social distancing,Mask wearing	Yes	Yes	Yes	Yes
31 to 40	Female		White British		Education/Academia		Other	neurological condition triggered by virus -C.F.S/M.E	Never		I never had Covid-19		I never had Covid-19		No			Yes	Covid-19,Work,Other	People not giving space in public places	Speak to family/ friends,Other	go for a walk or listen to music	Yes	Pfizer-BioNTech		Yes	Tired,Strange feeling,Other	pain in arm	Less than a week	Yourself,Children,Family	Yes			Tier response system	Yes	Yes	Yes	No
50 to 60	Male		White British		Education/Academia		None		Never		I never had Covid-19		I never had Covid-19		No	No		Yes	Pandemic		Watch movies/TV shows etc.		Yes	Oxford-AstraZeneca		Yes	Tired,Headache		Less than a week	Yourself,Children,Family	Yes			Tier response system,Social distancing,Mask wearing	Yes	Yes	Yes	No
41 to 50	Female		White British		Education/Academia		None		Never		I never had Covid-19		I never had Covid-19		No	No		Yes	Covid-19,Work,Pandemic,Childcare/ school closures		Speak to family/ friends		Yes	Oxford-AstraZeneca		No	Tired,Aches/chills		Less than a week	Yourself,Family	Yes			Tier response system	Yes	Yes	Yes	Yes
60 to 70	Male		White British		Education/Academia		A severe lung condition (such as cystic fibrosis, severe asthma or severe COPD)		Never		I never had Covid-19		I never had Covid-19		No			Yes	Pandemic		Speak to family/ friends		Yes	Oxford-AstraZeneca		Yes	Tired		Less than a week	Yourself,Children,Family	Yes			Tier response system	No	Yes	Yes	Yes
50 to 60	Female		White British		Education/Academia		None		Never		I never had Covid-19		I never had Covid-19		No	No		Yes	Other	My dad had to attend hospital for something else (he was 88). He caught covid there and died from the virus. His illness and death were stressful, and I was able to visit him in hospital on the covid ward during the last three days of his life. Watching him die and being on a ward with four covid sufferers was incredibly stressful.	Other	Spend time at farm with horses, walk, go to the caravan in the middle of the countryside	Yes	Oxford-AstraZeneca		Yes	None		Less than a week	Yourself,Children,Family	Yes			Tier response system	No	Yes	Yes	Yes
41 to 50	Male		White British		Education/Academia		None		Never		I never had Covid-19		I never had Covid-19		No			Yes	Childcare/ school closures		Other	Get on with it	Yes	Oxford-AstraZeneca		Yes	Tired,Headache,Fever,Aches/chills,Nausea		Less than a week	Yourself	Yes			Tier response system,Social distancing,Mask wearing	No	Yes	Yes	Yes
31 to 40	Female		White British		Education/Academia		None		Never		I never had Covid-19		I never had Covid-19		No			Yes	Covid-19,Vaccine,Work,Pandemic,Relationships,Childcare/ school closures		Watch movies/TV shows etc.,Excessive use of social media,Speak to family/ friends		Yes	None						None	No	Side effects,Other	I dont think enough research has been done and if it will even provide protection from various variants	No restrictions	Yes	Yes	Yes	Yes
50 to 60	Female		White British		Education/Academia		None		Never		I never had Covid-19		I never had Covid-19		No			Yes	Work		Watch movies/TV shows etc.,Sports/Games,Speak to family/ friends,Engage in hobbies,Other	Walk a lot outside, plan future holidays	Yes	Oxford-AstraZeneca		No	Tired,Headache,Pain in muscle/swelling		Less than a week	Yourself,Children,Family	Yes			No restrictions	Yes	Yes	No	Yes
41 to 50	Male		Other	Mixed - White and Asian	Education/Academia		None		Never		I never had Covid-19		I never had Covid-19		No			Yes	Vaccine,Work		Sports/Games		Yes	Oxford-AstraZeneca		No	Tired,Strange feeling,Headache,Fever,Aches/chills,Dizziness		Over 2 weeks	Don’t know	No	Side effects		Tier response system,Social distancing,Mask wearing	No	Yes	No	No
60 to 70	Female		White British		Education/Academia		None		Never		I never had Covid-19		I never had Covid-19		No			Yes	Work,Pandemic,Relationships,Other	Family pressures	Other	Walk/ gardening	Yes	Oxford-AstraZeneca		Yes	Tired,Headache		Less than a week	Family	Yes			Social distancing,Mask wearing	No	Yes	Yes	Yes
31 to 40	Female		White British		Education/Academia		None		Never		I never had Covid-19		I never had Covid-19		No			Yes	Covid-19,Work,Childcare/ school closures		Watch movies/TV shows etc.,Sports/Games,Speak to family/ friends,Engage in hobbies		Yes	Oxford-AstraZeneca		Yes	Headache,Aches/chills,Pain in muscle/swelling,Nausea		Less than a week	Yourself,Family	Yes			Tier response system	Yes	Yes	No	No
60 to 70	Male		White British		Education/Academia		None		Never		I never had Covid-19		I never had Covid-19		No			No			I don't feel any stress due to Covid-19		Yes	Pfizer-BioNTech		Yes	Enlarged lymph nodes,Other	Red rash on torso	Over 2 weeks	Yourself,Family	Yes			Tier response system	Yes	Yes	No	Yes
41 to 50	Male		White British		Education/Academia		None		Never		I never had Covid-19		I never had Covid-19		No			Yes	Work		Watch movies/TV shows etc.,Excessive use of social media,Sports/Games,Speak to family/ friends,Engage in hobbies		Yes	Oxford-AstraZeneca		Yes	Tired		Less than a week	Yourself,Children,Family	Yes			Tier response system,Social distancing,Mask wearing	Yes	Yes	No	Yes
41 to 50	Female		White British		Education/Academia		None		Never		I never had Covid-19		I never had Covid-19		No	No		Yes	Pandemic		Speak to family/ friends		Yes	Pfizer-BioNTech		Yes	Pain in muscle/swelling		Less than a week	Yourself,Family	Yes			Tier response system,Social distancing,Mask wearing	Yes	Yes	No	No
Over 70	Female		White British		Other	Retired	None		Never		I never had Covid-19		I never had Covid-19		No	No		Yes	Pandemic		Speak to family/ friends		Yes	Oxford-AstraZeneca		Yes	Itchy skin/rash		Less than a week	Yourself,Family	Yes			Tier response system,Mask wearing	Yes	Yes	Yes	No
Over 70	Male		White British		Other	Retired	Obesity,Other	Triple bypass	Never		I never had Covid-19		I never had Covid-19		No	No		Yes	Pandemic		Watch movies/TV shows etc.		Yes	Oxford-AstraZeneca		Yes	None		Less than a week	Family	Yes			Tier response system,Social distancing	Yes	Yes	Yes	No
31 to 40	Female		White British		Law		A problem with your spleen or your spleen has been removed (splenectomy)		Jan 2020 to April 2020		Symptoms managed at home		Longer than 14 days		Yes	No	Reduction in fitness	Yes	Covid-19,Work,Pandemic,Childcare/ school closures		Watch movies/TV shows etc.,Speak to family/ friends,Engage in hobbies		Yes	Pfizer-BioNTech		Yes	Tired,Headache,Aches/chills,Pain in muscle/swelling		Less than a week	Yourself,Children,Family	Yes			Tier response system,Social distancing,Mask wearing	No	Yes	Yes	Yes
41 to 50	Female		White British		Carer services		None		Never		I never had Covid-19		I never had Covid-19		No	No		No			I don't feel any stress due to Covid-19		Yes	Pfizer-BioNTech		No	None		Less than a week	Yourself,Family	Yes			Social distancing,Mask wearing	No	Yes	Yes	Yes
Over 70	Female		White British		Other	Retired	None		Never		I never had Covid-19		I never had Covid-19		No			No			I don't feel any stress due to Covid-19		Yes	Pfizer-BioNTech		No	Tired		Less than a week	Family	Yes			No restrictions	No	Yes	No	No
50 to 60	Male		White British		Other	Information Technology	None		Never		I never had Covid-19		I never had Covid-19		No	No		No	Other	None of the above	I don't feel any stress due to Covid-19		Yes	Oxford-AstraZeneca		No	Tired,Other	Hayfever like symptoms	Less than a week	Yourself,Children,Family	Yes	Other	None of above	Social distancing,Mask wearing	Yes	Yes	Yes	No
50 to 60	Female		Black, African, Caribbean or Black British		Education/Academia		None		Never		I never had Covid-19		I never had Covid-19		No			Yes	Covid-19,Pandemic,Childcare/ school closures		Watch movies/TV shows etc.,Excessive use of social media,Speak to family/ friends		Yes	Oxford-AstraZeneca		Yes	Tired,Headache,Fever,Aches/chills		Less than a week	Yourself,Family	Yes			Lockdown and observe R rate for longer,Tier response system,Social distancing,Mask wearing	Yes	Yes	No	Yes
50 to 60	Female		White European		Construction/Building		None		Never		I never had Covid-19		I never had Covid-19		No			Yes	Work		Speak to family/ friends,Engage in hobbies		Yes	None						None	No	History of allergy		Social distancing	No	Yes	No	No
50 to 60	Female		White European		Medical (e.g. NHS, Pharmacy)		None		Never		I never had Covid-19		I never had Covid-19		Yes	No		No			I don't feel any stress due to Covid-19		Yes	Pfizer-BioNTech		Yes	Pain in muscle/swelling		Less than a week	Family	Yes			No restrictions	No	Yes	Yes	No
31 to 40	Female		Chinese		Media/Journalism		None		Never		I never had Covid-19		I never had Covid-19		No			Yes	Covid-19,Work,Pandemic,Finance,Relationships		Watch movies/TV shows etc.,Excessive use of social media,Sports/Games,Engage in hobbies		Yes	Pfizer-BioNTech		Yes	Pain in muscle/swelling		Less than a week	Yourself,Family	Yes			Tier response system,Social distancing,Mask wearing	Yes	Yes	Yes	Yes
31 to 40	Male		Asian/Asian British/Arabic		Transport/Logistics		None		Never		I never had Covid-19		I never had Covid-19		No			Yes	Work,Studies/Performance,Finance,Relationships		Sports/Games,Engage in hobbies,Other	Video games	Yes	Pfizer-BioNTech		Yes	Tired,Strange feeling		Less than a week	Yourself,Children,Family	Yes			No restrictions	Yes	Yes	No	Yes
31 to 40	Female		White European		Education/Academia		None		Never		I never had Covid-19		I never had Covid-19		No			Yes	Covid-19,Work,Pandemic,Childcare/ school closures		Speak to family/ friends,Engage in hobbies		Yes	Pfizer-BioNTech		Yes	Tired,Headache,Aches/chills,Pain in muscle/swelling		Less than a week	Yourself,Children,Family	Yes			Social distancing,Mask wearing	Yes	Yes	No	Yes
31 to 40	Female		White British		Education/Academia		None		Never		I never had Covid-19		I never had Covid-19		No			Yes	Covid-19,Pandemic,Childcare/ school closures		Watch movies/TV shows etc.,Sports/Games,Speak to family/ friends		Yes	Pfizer-BioNTech		Yes	Pain in muscle/swelling		Less than a week	Yourself,Children,Family	Yes			Social distancing,Mask wearing	Yes	Yes	Yes	Yes
41 to 50	Female		White British		Education/Academia		Obesity		January 2021 and onwards		I never had Covid-19		I never had Covid-19		No	No		Yes	Pandemic,Childcare/ school closures		Watch movies/TV shows etc.,Excessive use of social media		Yes	None						None	No	Side effects		Lockdown and observe R rate for longer,Social distancing,Mask wearing	No	Yes	No	Yes
41 to 50	Male		White British		Education/Academia		None		Never		I never had Covid-19		I never had Covid-19		No	No		Yes	Childcare/ school closures		Engage in hobbies,Other	Eat	Yes	Oxford-AstraZeneca		Yes	Tired,Strange feeling,Headache,Pain in muscle/swelling		Less than a week	Yourself,Children,Family	Yes			Tier response system,Social distancing,Mask wearing	No	Yes	Yes	Yes
50 to 60	Male		White British		Other	Waste and Recycling	None		Never		I never had Covid-19		I never had Covid-19		No	No		No			I don't feel any stress due to Covid-19		Yes	Oxford-AstraZeneca		Yes	Headache,Pain in muscle/swelling		Less than a week	Yourself,Children,Family	Yes			Tier response system,Social distancing	No	Yes	No	No
41 to 50	Female		White British		Carer services		Diabetes		Never		I never had Covid-19		I never had Covid-19		No	No		Yes	Finance,Childcare/ school closures		Other	Drink alcohol	Yes	Oxford-AstraZeneca		Yes	Tired,Strange feeling,Nausea,Vomiting,Dizziness		Less than a week	Yourself,Children,Family	Yes			Social distancing	Yes	Yes	Yes	Yes
41 to 50	Female		White British		Education/Academia		None		Never		I never had Covid-19		I never had Covid-19		No			Yes	Covid-19,Vaccine,Pandemic,Studies/Performance,Finance,Relationships		Watch movies/TV shows etc.,Speak to family/ friends,Engage in hobbies		Yes	Oxford-AstraZeneca		Yes	Tired,Strange feeling,Headache,Aches/chills,Pain in muscle/swelling,Dizziness		Less than a week	Yourself,Family	Yes			Tier response system	Yes	Yes	Yes	Yes
41 to 50	Female		White British		Education/Academia		None		Never		Symptoms managed at home		Up to 7 days		No		Negative impact on mental health	Yes	Work,Childcare/ school closures		Sports/Games		Yes	Oxford-AstraZeneca		No	Headache,Fever,Pain in muscle/swelling		Less than a week	Yourself,Children,Family	Yes			No restrictions	Yes	Yes	Yes	Yes
50 to 60	Female		White British		Medical (e.g. NHS, Pharmacy)		None		Never		I never had Covid-19		I never had Covid-19		No			Yes	Pandemic		Watch movies/TV shows etc.,Engage in hobbies		Yes	Oxford-AstraZeneca		Yes	Tired,Headache,Aches/chills		Less than a week	Yourself,Family	Yes			Tier response system,Social distancing,Mask wearing	No	Yes	Yes	No
50 to 60	Female		White British		Education/Academia		None		Never		I never had Covid-19		I never had Covid-19		No	No		Yes	Relationships		Speak to family/ friends		Yes	Oxford-AstraZeneca		Yes	Tired		Less than a week	Yourself,Children,Family	Yes			Social distancing,Mask wearing,No restrictions	No	Yes	No	Yes
50 to 60	Male		White British		Education/Academia		None		Never		I never had Covid-19		I never had Covid-19		No			Yes	Work,Childcare/ school closures		Sports/Games		Yes	Oxford-AstraZeneca		No	Tired,Aches/chills		Less than a week	Yourself,Children,Family	Yes			No restrictions	No	Yes	Yes	Yes
41 to 50	Female		White British		Education/Academia		None		Never		I never had Covid-19		I never had Covid-19		No			Yes	Covid-19,Pandemic,Childcare/ school closures		Watch movies/TV shows etc.,Engage in hobbies		Yes	Oxford-AstraZeneca		Yes	Aches/chills,Dizziness		Less than a week	Yourself,Children,Family	Yes			Tier response system	Yes	Yes	Yes	Yes
31 to 40	Female		Asian/Asian British/Arabic		Other	Unemployment	None		Never		I never had Covid-19		I never had Covid-19		No	No		No	Childcare/ school closures		Watch movies/TV shows etc.,Speak to family/ friends		Yes	None						None	No	Side effects		No restrictions	Yes	Yes	Yes	Yes
41 to 50	Male		Asian/Asian British/Arabic		Retail/Buying		None		Never		I never had Covid-19		I never had Covid-19		No	No		No	Covid-19		Watch movies/TV shows etc.,Sports/Games,Speak to family/ friends,Engage in hobbies		Yes	None						Don’t know	No	Side effects,Personal beliefs		Lockdown and observe R rate for longer,Tier response system,Social distancing,Mask wearing	Yes	Yes	Yes	No
21 to 30	Male		Asian/Asian British/Arabic		Self employed		None		Jan 2020 to April 2020		Symptoms managed at home		Up to 3 days		No	No		Yes	Covid-19		Sports/Games		Yes	None						Family	Yes	Side effects		Mask wearing	Yes	Yes	Yes	Yes
31 to 40	Female		Asian/Asian British/Arabic		Education/Academia		None		Never		I never had Covid-19		I never had Covid-19		No			Yes	Pandemic,Finance,Childcare/ school closures		Watch movies/TV shows etc.,Excessive use of social media,Speak to family/ friends		Yes	None						Yourself,Children,Family	No	Side effects		No restrictions	No	Yes	Yes	Yes
50 to 60	Male		White British		Other	Engineering	None		Never		I never had Covid-19		I never had Covid-19		No			Yes	Work		Sports/Games		Yes	Oxford-AstraZeneca		Yes	None		Over 2 weeks	Yourself	Yes			No restrictions	Yes	Yes	Yes	Yes
60 to 70	Female		White British		Medical (e.g. NHS, Pharmacy)		Obesity		Never		I never had Covid-19		I never had Covid-19		No			Yes	Work		Watch movies/TV shows etc.,Speak to family/ friends		Yes	Pfizer-BioNTech		Yes	Tired		Less than a week	Yourself,Children,Family	Yes			Lockdown and observe R rate for longer	Yes	Yes	No	No
50 to 60	Male		White British		Retail/Buying		Obesity		Never		I never had Covid-19		I never had Covid-19		No	No		Yes	Work		Sports/Games		Yes	Oxford-AstraZeneca		Yes	Headache,Fever,Aches/chills,Pain in muscle/swelling,Dizziness		Less than a week	Yourself,Family	Yes			Lockdown and observe R rate for longer,Tier response system	No	Yes	Yes	Yes
60 to 70	Female		White British		Other	Disabled	None		Never		I never had Covid-19		I never had Covid-19		No	No		No			Speak to family/ friends		Yes	Oxford-AstraZeneca		Yes	Headache,Pain in muscle/swelling		Less than a week	Yourself,Family	Yes			Social distancing,Mask wearing	Yes	Yes	Yes	Yes
Over 70	Male		White British		Medical (e.g. NHS, Pharmacy)		Blood or bone marrow cancer (such as leukaemia, lymphoma or myeloma)		Never		I never had Covid-19		I never had Covid-19		No			Yes	Other	bereavement of partner - non covid related	Speak to family/ friends		Yes	Pfizer-BioNTech		Yes	None		Less than a week	Yourself,Children,Family	Yes			Tier response system,Mask wearing	No	Yes	No	Yes
60 to 70	Female		White British		Education/Academia		None		Never		I never had Covid-19		I never had Covid-19		No	No		Yes	Work,Studies/Performance		Watch movies/TV shows etc.,Speak to family/ friends		Yes	Oxford-AstraZeneca		No	None		Less than a week	Yourself	Yes			Social distancing,Mask wearing	Yes	Yes	Yes	Yes
41 to 50	Male		White British		Education/Academia		None		Never		Symptoms requiring GP appointment/ 111 advice		Longer than 14 days		No		Negative impact on mental health	Yes	Covid-19		Sports/Games		Yes	Oxford-AstraZeneca		Yes	Tired,Aches/chills		Less than a week	Yourself,Children,Family	Yes			Mask wearing	Yes	Yes	No	No
Over 70	Female		White British		Education/Academia		Chemotherapy or antibody treatment for cancer, including immunotherapy		Never		I never had Covid-19		I never had Covid-19		No			No			Other	Holidays	Yes	Pfizer-BioNTech		No	None		Less than a week	Family	Yes			No restrictions	Yes	Yes	No	No
50 to 60	Female		White British		Education/Academia		None		Never		I never had Covid-19		I never had Covid-19		No			Yes	Covid-19,Pandemic,Childcare/ school closures		Speak to family/ friends,Engage in hobbies		Yes	Oxford-AstraZeneca		Yes	Other	ears feel blocked, I can feel 'popping' when I swallow swallowing	Over 2 weeks	Yourself,Children,Family	Yes			Tier response system,No restrictions	No	Yes	Yes	Yes
41 to 50	Male		Asian/Asian British/Arabic		Medical (e.g. NHS, Pharmacy)		None		Sept 2020 to December 2020		Symptoms requiring hospitalisation		Longer than 14 days		Yes	No	Reduction in fitness	Yes	Covid-19		Excessive use of social media		Yes	Pfizer-BioNTech		Yes	Tired,Fever,Aches/chills		Less than a week	Family	Yes			Lockdown and observe R rate for longer	Yes	Yes	Yes	Yes
50 to 60	Female		White British		Education/Academia		Other	asthma	Other	i had antibody test last june and have the antibodies although never had any symtons	I never had Covid-19		I never had Covid-19		No	No	Negative impact on relationships	Yes	Other	carer for someone on highly vulnerable list	Other	gardening and geocaching	Yes	Pfizer-BioNTech		Yes	Aches/chills		Less than a week	Yourself,Children,Family	Yes			Social distancing,Mask wearing	Yes	Yes	Yes	Yes
31 to 40	Female		White British		Education/Academia		None		Never		I never had Covid-19		I never had Covid-19		No			Yes	Covid-19,Vaccine,Pandemic,Childcare/ school closures		Watch movies/TV shows etc.,Speak to family/ friends,Engage in hobbies		Yes	None						Don’t know	No	Other	affecting women's cycles	Social distancing,Mask wearing	Yes	Yes	No	Yes
50 to 60	Female		White British		Other	Housewife	None		Never		I never had Covid-19		I never had Covid-19		No			Yes	Childcare/ school closures		Watch movies/TV shows etc.,Sports/Games,Speak to family/ friends,Engage in hobbies		Yes	Oxford-AstraZeneca		No	Tired,Aches/chills		Less than a week	Yourself,Children,Family	Yes			Tier response system	No	Yes	No	Yes
Over 70	Male		White British		Self employed		None		Never		I never had Covid-19		I never had Covid-19		No	No		No			I don't feel any stress due to Covid-19		Yes	Pfizer-BioNTech		Yes	None		Less than a week	Family	Yes	Side effects		No restrictions	Yes	Yes	No	Yes
60 to 70	Female		White British		Carer services		A severe lung condition (such as cystic fibrosis, severe asthma or severe COPD),None		Never		I never had Covid-19		I never had Covid-19		No	No		No	Covid-19		Watch movies/TV shows etc.		Yes	Don't know		No	None		Less than a week	Yourself	Yes			No restrictions	Yes	No	Yes	Yes
60 to 70	Female		White British		Other	Facilities	None		Never		I never had Covid-19		I never had Covid-19		No	No		No			Watch movies/TV shows etc.		Yes	Pfizer-BioNTech		No	Headache,Aches/chills,Pain in muscle/swelling		Less than a week	Yourself	Yes			Mask wearing	No	Yes	Yes	No
Over 70	Female		White British		Other	Wife	None		Never		I never had Covid-19		I never had Covid-19		No	No		No	Other	Eyes	Other	Med advice	Yes	Pfizer-BioNTech		Yes	None		Less than a week	Family	Yes			No restrictions	No	Yes	Yes	Yes
21 to 30	Female		White British		Medical (e.g. NHS, Pharmacy)		None		Sept 2020 to December 2020		Symptoms managed at home		Up to 7 days		No	No	Sick leave extending longer than self-isolation period,Reduction in fitness	Yes	Pandemic		Sports/Games		Yes	None			Tired,Headache,Fever,Aches/chills,Pain in muscle/swelling,Nausea,Dizziness		Less than a week	Yourself,Family	Yes			No restrictions	Yes	Yes	Yes	Yes
41 to 50	Female		White British		Medical (e.g. NHS, Pharmacy)		None		Never		I never had Covid-19		I never had Covid-19		No	No		Yes	Work,Finance,Childcare/ school closures		Speak to family/ friends,Engage in hobbies		Yes	Pfizer-BioNTech		Yes	Headache,Fever,Aches/chills,Pain in muscle/swelling,Nausea,Vomiting,Dizziness		Less than a week	Yourself,Children,Family	Yes			Tier response system,Social distancing,Mask wearing	Yes	Yes	Yes	Yes
50 to 60	Female		White British		Medical (e.g. NHS, Pharmacy)		None		Never		I never had Covid-19		I never had Covid-19		No	No		Yes	Pandemic		Watch movies/TV shows etc.,Excessive use of social media,Speak to family/ friends		Yes	Pfizer-BioNTech		No	Tired,Pain in muscle/swelling		Less than a week	Yourself,Children,Family	Yes			No restrictions	Yes	Yes	No	Yes
50 to 60	Female		Asian/Asian British/Arabic		Medical (e.g. NHS, Pharmacy)		Other,None	Controlled asthma	Never		I never had Covid-19		I never had Covid-19		No	No		Yes	Pandemic		Watch movies/TV shows etc.,Speak to family/ friends		Yes	Oxford-AstraZeneca		Yes	Tired,Headache,Other	Periorbital swelling	Over 2 weeks	Yourself,Children,Family	Yes			Mask wearing	Yes	Yes	No	No
41 to 50	Female		Other	I do not wish to state	Other	self-employed not working at present	None		Never		I never had Covid-19		I never had Covid-19		No	No		Yes	Pandemic,Other	closure of public toilets, libraries, loss of Internet access, stress caused by crowded spaces & lack of social distancing	Watch movies/TV shows etc.		Yes	Other	Moderna	No	Tired,Pain in muscle/swelling		Less than a week	Yourself,Family	Yes			Tier response system,Mask wearing	Yes	Yes	Yes	No
21 to 30	Female		Black, African, Caribbean or Black British		Medical (e.g. NHS, Pharmacy)		None		Never		I never had Covid-19		I never had Covid-19		No	No		Yes	Work		Watch movies/TV shows etc.,Excessive use of social media,Speak to family/ friends,Engage in hobbies		Yes	Pfizer-BioNTech		Yes	Tired,Headache,Aches/chills,Pain in muscle/swelling,Itchy skin/rash		Less than a week	Yourself,Children,Family	Yes			Social distancing,Mask wearing	Yes	Yes	Yes	Yes
21 to 30	Female		Asian/Asian British/Arabic		Other	NHS Administrative Services	None		Sept 2020 to December 2020		Symptoms managed at home		Up to 14 days		No	No	Reduction in fitness,Negative impact on mental health,Negative impact on relationships	Yes	Covid-19,Pandemic,Studies/Performance		Other	Sleep	Yes	Pfizer-BioNTech		No	Tired,Other	Flu like symptoms sneezing	Less than a week	None	No	Side effects,Personal beliefs,Other	How fast tracked it was compared to other studies and the mentality that this is to be forced on you without extensive research time	Lockdown and observe R rate for longer,Tier response system,Social distancing,Mask wearing	Yes	Yes	Yes	Yes
21 to 30	Female		Asian/Asian British/Arabic		Medical (e.g. NHS, Pharmacy)		None		Sept 2020 to December 2020		Symptoms managed at home		Up to 7 days		No	No	Reduction in fitness,Negative impact on mental health	Yes	Covid-19,Work,Pandemic,Finance,Relationships		Watch movies/TV shows etc.,Excessive use of social media,Speak to family/ friends,Engage in hobbies		Yes	Pfizer-BioNTech		Yes	Tired,Headache,Fever,Pain in muscle/swelling		Less than a week	Yourself,Family	Yes			No restrictions	Yes	Yes	Yes	Yes
21 to 30	Female		Asian/Asian British/Arabic		Medical (e.g. NHS, Pharmacy)		None		Never		I never had Covid-19		I never had Covid-19		No	No		Yes	Covid-19,Work,Pandemic		Watch movies/TV shows etc.,Engage in hobbies		Yes	Pfizer-BioNTech		No	Tired,Headache,Aches/chills,Pain in muscle/swelling		Less than a week	Yourself,Children,Family	Yes			Lockdown and observe R rate for longer,Tier response system,Social distancing,Mask wearing	No	Yes	Yes	Yes
31 to 40	Male		Asian/Asian British/Arabic		Medical (e.g. NHS, Pharmacy)		None		Never		I never had Covid-19		I never had Covid-19		No	No		Yes	Vaccine,Work,Finance,Relationships,Childcare/ school closures		Other	Help with childcare, affected me working and earning.	Yes	Oxford-AstraZeneca		No	None		Less than a week	Yourself,Family	No	Other	Time constraints to more thorough testing. Lack of faith in government/s given the rising taxes/intro of stamp duty/inheritance tax and other punitive measures, the	Lockdown and observe R rate for longer,Social distancing,Mask wearing	Yes	Yes	Yes	Yes
60 to 70	Female		White British		Medical (e.g. NHS, Pharmacy)		None		January 2021 and onwards		Symptoms managed at home		Up to 3 days		No	No	Negative impact on mental health,Negative impact on relationships	Yes	Other	missing family	Speak to family/ friends,Engage in hobbies		Yes	Pfizer-BioNTech		Yes	Pain in muscle/swelling		Less than a week	Yourself,Children,Family	Yes			Social distancing,Mask wearing	No	Yes	Yes	Yes
50 to 60	Female		Other	Iranian	Education/Academia		None		Never		I never had Covid-19		I never had Covid-19		No	No		Yes	Work		Sports/Games		Yes	Oxford-AstraZeneca		Yes	Fever		Less than a week	Yourself	Yes			Lockdown and observe R rate for longer	Yes	Yes	No	No
60 to 70	Female		White British		Medical (e.g. NHS, Pharmacy)		None		Never		I never had Covid-19		I never had Covid-19		No	No		No			I don't feel any stress due to Covid-19		Yes	Pfizer-BioNTech		No	None		Less than a week	Family	Yes			Tier response system,Social distancing,Mask wearing	Yes	Yes	No	No
21 to 30	Female		White British		Retail/Buying		Other	Asthma	Never		Symptoms requiring GP appointment/ 111 advice		Up to 14 days		No	No	Negative impact on relationships	Yes	Work,Pandemic,Relationships		Watch movies/TV shows etc.,Speak to family/ friends		Yes	None						Don’t know	No	Side effects		No restrictions	Yes	No	Yes	Yes
41 to 50	Female		White British		Medical (e.g. NHS, Pharmacy)		None		Never		I never had Covid-19		I never had Covid-19		No	No		No			Speak to family/ friends,Engage in hobbies		Yes	Pfizer-BioNTech		Yes	Tired,Aches/chills		Less than a week	Yourself,Family	Yes			Tier response system,Social distancing	Yes	Yes	No	Yes
21 to 30	Female		White British		Finance services/Banking/Insurance		None		Jan 2020 to April 2020		Symptoms managed at home		Up to 14 days		No	No	Reduction in fitness	No			I don't feel any stress due to Covid-19		Yes	None						Don’t know	No	Side effects		Mask wearing	Yes	Yes	No	Yes
21 to 30	Male		White British		Other	Armed forces	None		Jan 2020 to April 2020		Symptoms managed at home		Up to 7 days		Yes	No	Reduction in fitness	No			I don't feel any stress due to Covid-19		Yes	None						Yourself,Family	Yes			No restrictions	Yes	Yes	Yes	Yes
21 to 30	Female		White British		Medical (e.g. NHS, Pharmacy)		None		Never		I never had Covid-19		I never had Covid-19		No			Yes	Covid-19,Work,Pandemic,Studies/Performance		Speak to family/ friends,Engage in hobbies		Yes	Pfizer-BioNTech		No	Tired,Pain in muscle/swelling		Less than a week	Yourself,Children,Family	Yes			No restrictions	Yes	Yes	No	No
21 to 30	Female		White British		Medical (e.g. NHS, Pharmacy)		None		Never		I never had Covid-19		I never had Covid-19		Yes			Yes	Work		Speak to family/ friends		Yes	None						Family	No	Other	Fertility in the near future	Mask wearing	Yes	Yes	No	Yes
31 to 40	Female		Chinese		Medical (e.g. NHS, Pharmacy)		None		Never		I never had Covid-19		I never had Covid-19		No			No			I don't feel any stress due to Covid-19		Yes	Pfizer-BioNTech		No	Tired,Aches/chills		Less than a week	Yourself	No	Other	Future health side effects	Lockdown and observe R rate for longer,Tier response system,Social distancing,Mask wearing	No	Yes	Yes	No
31 to 40	Female		White British		Medical (e.g. NHS, Pharmacy)		None		Never		I never had Covid-19		I never had Covid-19		No	No		Yes	Work,Childcare/ school closures		Excessive use of social media,Speak to family/ friends		Yes	Pfizer-BioNTech		No	Tired,Strange feeling,Headache,Fever,Aches/chills,Pain in muscle/swelling,Nausea,Vomiting		Less than a week	Yourself	No	Side effects		Social distancing	Yes	Yes	Yes	Yes
41 to 50	Female		White British		Medical (e.g. NHS, Pharmacy)		None		Never		I never had Covid-19		I never had Covid-19		Yes	No		Yes	Childcare/ school closures		Sports/Games		Yes	Pfizer-BioNTech		No	Tired,Aches/chills		Less than a week	Yourself,Children,Family	Yes			No restrictions	No	Yes	No	Yes
21 to 30	Female		White British		Media/Journalism		None		Never		I never had Covid-19		I never had Covid-19		No			Yes	Relationships		Excessive use of social media		Yes	None						Yourself,Family	Yes			No restrictions	Yes	Yes	No	No
31 to 40	Female		White British		Finance services/Banking/Insurance		On medicine that makes you much more likely to get infections (such as high doses of steroids or immunosuppressant medicine)		Never		I never had Covid-19		I never had Covid-19		No	No		No			Watch movies/TV shows etc.,Engage in hobbies		Yes	Other	I haven't had it yet		Other	I haven't had it yet		Yourself,Children,Family	Yes			Social distancing,Mask wearing	Yes	Yes	Yes	Yes
Over 70	Male		White British		Construction/Building		None		Never		I never had Covid-19		I never had Covid-19		No	No		No			Engage in hobbies		Yes	Pfizer-BioNTech		Yes	None		Less than a week	Family	Yes			No restrictions	No	Yes	Yes	Yes
31 to 40	Male		Other	Arab	Medical (e.g. NHS, Pharmacy)		None		Never		I never had Covid-19		I never had Covid-19		No	No		No			I don't feel any stress due to Covid-19		Yes	Pfizer-BioNTech		No	Pain in muscle/swelling		Less than a week	Yourself,Family	Yes			Lockdown and observe R rate for longer	No	Yes	No	No
21 to 30	Male		White European		Charities		None		Never		I never had Covid-19		I never had Covid-19		No	No		Yes	Work,Pandemic,Studies/Performance,Finance,Relationships		Other	I don't really manage stress well	Yes	None						Don’t know	No	Side effects,Other	Doubts on safety of vaccine	Mask wearing	Yes	Yes	Yes	No
31 to 40	Female		Asian/Asian British/Arabic		Law		None		Sept 2020 to December 2020		Symptoms managed at home		Up to 7 days		Yes	No	Negative impact on mental health	Yes	Covid-19,Relationships		Watch movies/TV shows etc.		Yes	None						None	No	Side effects		No restrictions	Yes	Yes	No	No
31 to 40	Male		Asian/Asian British/Arabic		Construction/Building		Other,None	Asthma	Never		I never had Covid-19		I never had Covid-19		No	No		Yes	Covid-19,Vaccine,Work,Pandemic		Speak to family/ friends		Yes	Oxford-AstraZeneca		No	Strange feeling,Nausea		Less than a week	Yourself,Family	Yes			Tier response system	No	Yes	Yes	Yes
41 to 50	Male		Asian/Asian British/Arabic		Finance services/Banking/Insurance		None		Sept 2020 to December 2020		Symptoms managed at home		Up to 7 days		No	No	Sick leave extending longer than self-isolation period,Reduction in fitness	Yes	Covid-19,Work,Relationships		Speak to family/ friends,Other	Religious activities	Yes	Oxford-AstraZeneca		No	Tired,Strange feeling,Headache,Fever,Pain in muscle/swelling,Nausea,Dizziness		Less than a week	Yourself	No	Side effects		Social distancing	Yes	Yes	No	Yes
41 to 50	Male		Asian/Asian British/Arabic		Medical (e.g. NHS, Pharmacy)		None		Never		I never had Covid-19		I never had Covid-19		No	No		No			I don't feel any stress due to Covid-19		Yes	Pfizer-BioNTech		Yes	None		Less than a week	Family	Yes			Lockdown and observe R rate for longer,Tier response system,Social distancing,Mask wearing	Yes	Yes	Yes	Yes
21 to 30	Female		White British		Finance services/Banking/Insurance		None		January 2021 and onwards		Symptoms managed at home		Up to 14 days		Yes	No	Negative impact on mental health	Yes	Covid-19,Work,Pandemic		Watch movies/TV shows etc.,Speak to family/ friends,Engage in hobbies		Yes	None						Yourself,Children,Family	Yes			Mask wearing	Yes	Yes	No	No
Over 70	Female		White British		Other	Retired	Obesity		Other	Never tested	I never had Covid-19		I never had Covid-19		No	No		No			I don't feel any stress due to Covid-19		Yes	Oxford-AstraZeneca		No	Headache,Other	Sore arm	Less than a week	Yourself,Family	Yes			No restrictions	No	Yes	Yes	Yes
50 to 60	Female		White British		Education/Academia		None		Never		I never had Covid-19		I never had Covid-19		No			Yes	Work,Pandemic		Watch movies/TV shows etc.,Sports/Games,Speak to family/ friends		Yes	Pfizer-BioNTech		Yes	Tired,Pain in muscle/swelling		Less than a week	Yourself,Children,Family	Yes			Social distancing,Mask wearing	No	Yes	Yes	Yes
31 to 40	Female		White British		Medical (e.g. NHS, Pharmacy)		None		Never		Symptoms managed at home		Up to 14 days		Yes	No	Negative impact on mental health,Negative impact on relationships	Yes	Work,Relationships,Childcare/ school closures		Speak to family/ friends		Yes	Oxford-AstraZeneca		No	Tired,Nausea		Less than a week	Family	Yes			Lockdown and observe R rate for longer,Tier response system,Social distancing,Mask wearing	Yes	Yes	No	Yes
31 to 40	Female		White British		Carer services		None		Jan 2020 to April 2020		Symptoms managed at home		Up to 7 days		No	No	Development of other illnesses	No			Speak to family/ friends		Yes	Oxford-AstraZeneca		No	Tired,Headache,Pain in muscle/swelling,Dizziness		Less than a week	Yourself,Children,Family	Yes			Tier response system	Yes	Yes	Yes	No
50 to 60	Female		White British		Medical (e.g. NHS, Pharmacy)		None		Jan 2020 to April 2020		Symptoms managed at home		Up to 14 days		No		Reduction in fitness	Yes	Work,Pandemic		Excessive use of social media,Speak to family/ friends		Yes	Oxford-AstraZeneca		Yes	Tired,Headache,Fever,Aches/chills,Nausea		Less than a week	Yourself,Children,Family	Yes			Social distancing,Mask wearing	Yes	Yes	Yes	No
50 to 60	Female		White British		Medical (e.g. NHS, Pharmacy)		None		January 2021 and onwards		Symptoms requiring GP appointment/ 111 advice			5 months and still not recovered	Yes	Yes	Sick leave extending longer than self-isolation period,Development of other illnesses,Reduction in fitness,Negative impact on mental health	Yes	Covid-19		Watch movies/TV shows etc.,Speak to family/ friends		Yes	Oxford-AstraZeneca		No	Tired,Strange feeling,Headache,Nausea		Less than 2 weeks	Yourself,Children,Family	Yes			Tier response system,Social distancing,Mask wearing	Yes	Yes	Yes	No
41 to 50	Female		White British		Carer services		None		Never		I never had Covid-19		I never had Covid-19		No	No		Yes	Covid-19,Work,Pandemic,Finance,Relationships,Childcare/ school closures		Engage in hobbies		Yes	Oxford-AstraZeneca		Yes	None		Less than a week	Children,Family	Yes			Lockdown and observe R rate for longer,Social distancing,Mask wearing	No	Yes	Yes	No
41 to 50	Male		White British		Tourism and Travel		A severe lung condition (such as cystic fibrosis, severe asthma or severe COPD)		Sept 2020 to December 2020		Symptoms managed at home		Up to 14 days		No	No	Sick leave extending longer than self-isolation period,Reduction in fitness	No			Watch movies/TV shows etc.,Engage in hobbies		Yes	Oxford-AstraZeneca		Yes	None		Less than a week	Children,Family	Yes			Social distancing,Mask wearing	Yes	Yes	No	No
31 to 40	Female		White European		Carer services		None		Never		I never had Covid-19		I never had Covid-19		No	No		No			Watch movies/TV shows etc.		Yes	Oxford-AstraZeneca		No	Fever		Less than a week	Family	Yes			Mask wearing	No	No	Yes	No
41 to 50	Male		Asian/Asian British/Arabic		Carer services		None		Jan 2020 to April 2020		Symptoms requiring hospitalisation		Longer than 14 days		Yes	No	Sick leave extending longer than self-isolation period	Yes	Work		Excessive use of social media,Speak to family/ friends		Yes	Pfizer-BioNTech		Yes	Tired,Fever,Aches/chills,Pain in muscle/swelling		Less than a week	Yourself	No	Other	to get covid again	Social distancing,Mask wearing	Yes	Yes	Yes	Yes
50 to 60	Male		White British		Other	Manufacturing	Diabetes		Never		I never had Covid-19		I never had Covid-19		No			No			Engage in hobbies		Yes	Pfizer-BioNTech		Yes	Pain in muscle/swelling		Less than a week	Children	Yes			Mask wearing	No	Yes	Yes	Yes
31 to 40	Male		White British		Medical (e.g. NHS, Pharmacy)		None		Jan 2020 to April 2020		Symptoms managed at home		Up to 3 days		No	No	Reduction in fitness	Yes	Childcare/ school closures		Speak to family/ friends,Engage in hobbies		Yes	Oxford-AstraZeneca		No	Pain in muscle/swelling		Less than a week	Yourself,Family	Yes			Mask wearing	No	Yes	No	No
50 to 60	Male		Asian/Asian British/Arabic		Other	Housekeeping	Diabetes		Jan 2020 to April 2020		Symptoms requiring hospitalisation		Up to 14 days		Yes	No	Sick leave extending longer than self-isolation period,Development of other illnesses,Reduction in fitness	No			Watch movies/TV shows etc.		Yes	Pfizer-BioNTech		Yes	Headache,Fever,Pain in muscle/swelling		Less than a week	Family	Yes			Mask wearing	No	Yes	No	Yes
41 to 50	Female		Asian/Asian British/Arabic		Carer services		Diabetes		Never		I never had Covid-19		I never had Covid-19		No	No		No			Watch movies/TV shows etc.		Yes	Oxford-AstraZeneca		Yes	Fever,Pain in muscle/swelling		Less than a week	None	Yes			Mask wearing	Yes	Yes	Yes	Yes
50 to 60	Female		White British		Medical (e.g. NHS, Pharmacy)		Obesity		Never		I never had Covid-19		I never had Covid-19		No	No		No			I don't feel any stress due to Covid-19		Yes	Pfizer-BioNTech		Yes	None		Less than a week	Family	Yes			Social distancing	No	Yes	Yes	No
21 to 30	Female		White British		Law		None		Sept 2020 to December 2020		Symptoms managed at home		Up to 7 days		No	No	Reduction in fitness	No			Watch movies/TV shows etc.,Speak to family/ friends		Yes	Oxford-AstraZeneca		Yes	Aches/chills		Less than a week	Yourself,Family	Yes			No restrictions	Yes	Yes	No	Yes
50 to 60	Female		White British		Medical (e.g. NHS, Pharmacy)		None		Never		I never had Covid-19		I never had Covid-19		No	No		No	Pandemic		Other	Yoga, meditation, excercise	Yes	Oxford-AstraZeneca		Yes	Tired		Less than a week	Yourself,Family	Yes			Social distancing,Mask wearing,No restrictions	Yes	Yes	Yes	Yes
31 to 40	Female		White British		Education/Academia		None		Never		I never had Covid-19		I never had Covid-19		No	No		No			Speak to family/ friends,Engage in hobbies		Yes	Pfizer-BioNTech		No	Tired		Less than a week	Yourself,Children,Family	Yes			Lockdown and observe R rate for longer,Social distancing,Mask wearing	Yes	Yes	No	No
50 to 60	Male		Asian/Asian British/Arabic		Law		None		Never		I never had Covid-19		I never had Covid-19		No			No			Sports/Games		Yes	Oxford-AstraZeneca		No	None		Less than a week	Yourself	Yes			No restrictions	Yes	Yes	No	No
60 to 70	Male		White British		Other	Retired	Chemotherapy or antibody treatment for cancer, including immunotherapy,Blood or bone marrow cancer (such as leukaemia, lymphoma or myeloma),A severe lung condition (such as cystic fibrosis, severe asthma or severe COPD),None		Never		I never had Covid-19		I never had Covid-19		No	No		No			I don't feel any stress due to Covid-19		Yes	Oxford-AstraZeneca		Yes	Tired,Aches/chills,Pain in muscle/swelling		Less than a week	Yourself,Children,Family	Yes			Lockdown and observe R rate for longer,Social distancing,Mask wearing	Yes	Yes	Yes	Yes
Over 70	Male		White British		Other	Retired professional	Chemotherapy or antibody treatment for cancer, including immunotherapy,Blood or bone marrow cancer (such as leukaemia, lymphoma or myeloma)		Never		Symptoms managed at home		Up to 3 days		No			No			I don't feel any stress due to Covid-19		Yes	Oxford-AstraZeneca		No	Fever,Aches/chills		Less than a week	Family	Yes			No restrictions	No	Yes	No	Yes
21 to 30	Female		White British		Retail/Buying		None		Never		I never had Covid-19		I never had Covid-19		No	No	Negative impact on mental health	Yes	Covid-19,Vaccine,Work,Relationships		Watch movies/TV shows etc.,Excessive use of social media,Engage in hobbies		Yes	None						Don’t know	No	Side effects		Tier response system,Mask wearing	Yes	Yes	Yes	Yes
60 to 70	Female		White British		Other	Retired	None		Never		I never had Covid-19		I never had Covid-19		No			No			I don't feel any stress due to Covid-19		Yes	Oxford-AstraZeneca		Yes	Tired		Less than a week	Yourself,Children,Family	Yes			No restrictions	No	Yes	No	Yes
60 to 70	Male		White British		Other	Retired Aeronautical Engineer	An organ transplant		Never		I never had Covid-19		I never had Covid-19		No			Yes	Pandemic		Watch movies/TV shows etc.,Sports/Games,Speak to family/ friends,Other	Exercise, walking cycling	Yes	Oxford-AstraZeneca		Yes	Tired,Strange feeling,Pain in muscle/swelling		Less than a week	Yourself	Yes			Social distancing,Mask wearing	Yes	Yes	No	No
Over 70	Male		White British		Self employed		None		Never		I never had Covid-19		I never had Covid-19		No			No			I don't feel any stress due to Covid-19		Yes	Pfizer-BioNTech		No	Pain in muscle/swelling,Itchy skin/rash		Less than a week	Yourself,Children,Family	Yes			Mask wearing	No	Yes	No	No
41 to 50	Male		White British		Finance services/Banking/Insurance		None		Never		I never had Covid-19		I never had Covid-19		No	No		Yes	Work,Childcare/ school closures		Watch movies/TV shows etc.,Engage in hobbies		Yes	Oxford-AstraZeneca		No	Tired,Dizziness		Less than a week	Yourself,Children,Family	Yes			No restrictions	Yes	Yes	No	Yes
Over 70	Female		White British		Education/Academia		None		Never		I never had Covid-19		I never had Covid-19		No			Yes	Other	Not seeing granddaughters	Watch movies/TV shows etc.,Speak to family/ friends		Yes	Pfizer-BioNTech		Yes	None		Less than a week	Yourself,Family	Yes			Social distancing,Mask wearing	Yes	Yes	Yes	Yes
Over 70	Female		Asian/Asian British/Arabic		Finance services/Banking/Insurance		None		January 2021 and onwards		Symptoms requiring GP appointment/ 111 advice		Longer than 14 days		No		Reduction in fitness	Yes	Covid-19		Speak to family/ friends		No	None						Don’t know	No	Side effects		Social distancing,Mask wearing	No	Yes	No	Yes
31 to 40	Female		White British		Finance services/Banking/Insurance		None		Never		I never had Covid-19		I never had Covid-19		No	No		Yes	Work		Speak to family/ friends		Yes	Oxford-AstraZeneca		No	Tired,Headache,Fever,Aches/chills		Less than a week	Family	Yes			No restrictions	Yes	Yes	No	Yes
41 to 50	Female		White British		Finance services/Banking/Insurance		None		January 2021 and onwards			Purely light headed	Up to 7 days		No	No	Sick leave extending longer than self-isolation period	No			I don't feel any stress due to Covid-19		Yes	Oxford-AstraZeneca		No	Headache,Pain in muscle/swelling		Less than a week	Children,Family	Yes			Tier response system,Social distancing,Mask wearing	No	Yes	No	No
50 to 60	Female		White British		Medical (e.g. NHS, Pharmacy)		Obesity		Never		I never had Covid-19		I never had Covid-19		No			Yes	Work		Excessive use of social media,Speak to family/ friends		Yes	Pfizer-BioNTech		Yes	Tired,Headache,Pain in muscle/swelling		Less than a week	Yourself,Children,Family	Yes			Tier response system,Social distancing,Mask wearing	Yes	Yes	No	No
50 to 60	Male		White British		Other	Retired	On medicine that makes you much more likely to get infections (such as high doses of steroids or immunosuppressant medicine),Obesity,Other	Chronic venis insuffency9	Never		I never had Covid-19		I never had Covid-19		No	No		Yes	Covid-19		Watch movies/TV shows etc.,Other	Eat	Yes	Pfizer-BioNTech		No	Tired,Pain in muscle/swelling		Less than a week	Yourself,Children,Family	Yes			Social distancing,Mask wearing	Yes	Yes	Yes	No
31 to 40	Male		White British		Charities		None		Never		I never had Covid-19		I never had Covid-19		No			Yes	Work		Watch movies/TV shows etc.		Yes	Oxford-AstraZeneca		Yes	Tired,Headache		Less than a week	Yourself,Children,Family	Yes			Lockdown and observe R rate for longer,Tier response system,Social distancing,Mask wearing	Yes	Yes	No	No
41 to 50	Male		White British		Education/Academia		None		Never		I never had Covid-19		I never had Covid-19		No	No		Yes	Pandemic		Watch movies/TV shows etc.,Speak to family/ friends,Engage in hobbies		Yes	Oxford-AstraZeneca		Yes	Tired,Aches/chills		Less than a week	Yourself,Family	Yes			No restrictions	Yes	Yes	Yes	No
21 to 30	Male		Asian/Asian British/Arabic		Self employed		None		Never		I never had Covid-19		I never had Covid-19		No	No		No			Sports/Games		Yes	Pfizer-BioNTech		Yes	None		Less than a week	Yourself	Yes			No restrictions	Yes	Yes	Yes	Yes
Under 20	Male		Asian/Asian British/Arabic		Education/Academia		None		Never		I never had Covid-19		I never had Covid-19		No	No		No			Watch movies/TV shows etc.,Sports/Games		Yes	None						Don’t know	No	Side effects		Lockdown and observe R rate for longer	Yes	Yes	Yes	Yes
41 to 50	Female		Asian/Asian British/Arabic		Other	Housewife	None		Sept 2020 to December 2020		Symptoms managed at home		Up to 14 days		No	No	Development of other illnesses	Yes	Relationships		Watch movies/TV shows etc.		Yes	Pfizer-BioNTech		No	Tired,Strange feeling,Headache,Fever		Less than a week	Family	Yes			Lockdown and observe R rate for longer	Yes	Yes	Yes	Yes
