# Supplementary material for: Covid-19 Vaccination and Mental Stress within Diverse Socio-demographic Groups
Source: Preprints.org preprint supplement (doi:10.20944/preprints202208.0350.v1), 2022-08-18
Supplement: Supplementary file 2 [file Supplimentary Information S1.docx]

**Supplementary Information S1**

This file contains the additional visualization results in support of Results Section of main manuscript.


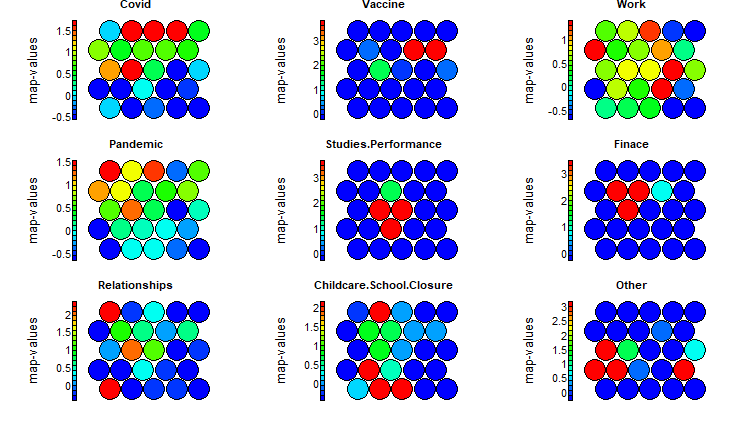


**Figure 1.S1.** SOM heatmap for inter-relationships between major stress factors. The plot can also be compared with the gender code plot (Figure 2 in manuscript)


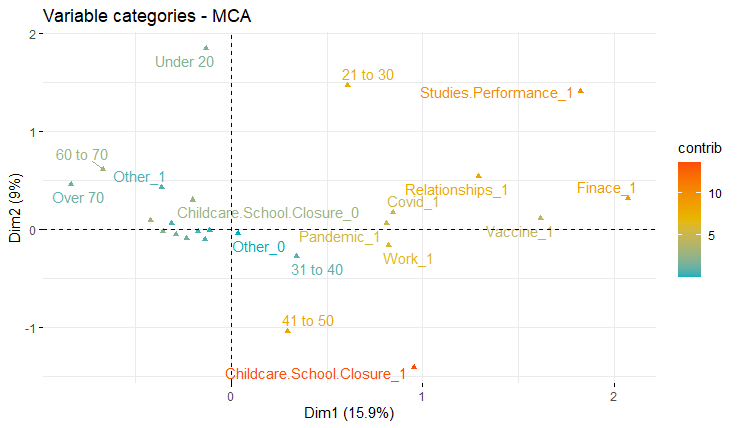


**Figure 2.S1.** MCA outcomes (1st two dimensions) indicating age-group correspondence to major stress causes reported in public responses. Closer the attributes, higher the correspondence and vice versa. Green to red ‘contrib’ colour scale indicates the contribution level being low to high respectively for corresponding dimension of MCA


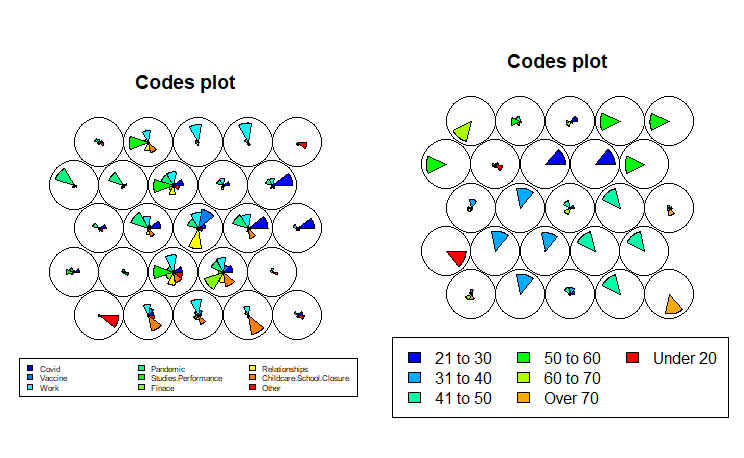


**Figure 3.S1.** SOM code plot for two-dimensional visualisation of inter-relationships between multiple stress causes (left side plot) within the dataset and participants’ age group.


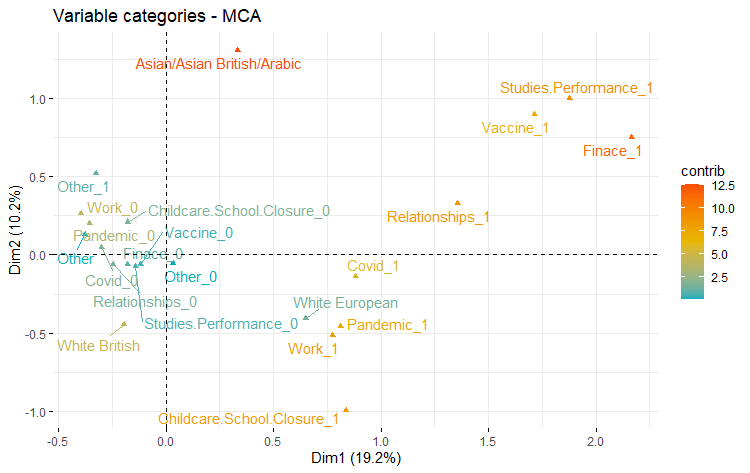


**Figure 4.S1.** MCA outcomes (1st two dimensions) indicating ethnicity correspondence to major stress causes reported in public responses


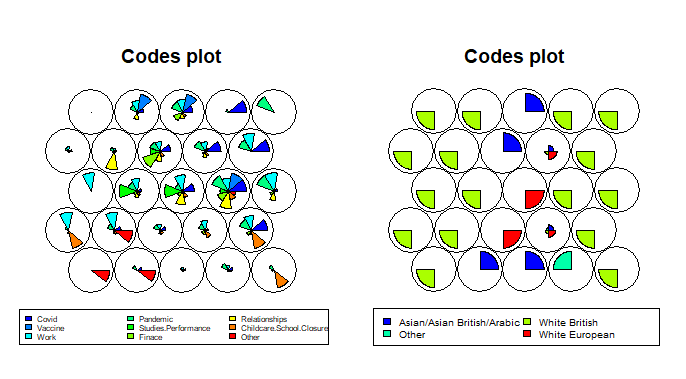


**Figure 5.S1.** SOM code plot for two-dimensional visualisation of inter-relationships between multiple stress causes (left side plot) within the dataset and participants’ ethnicity


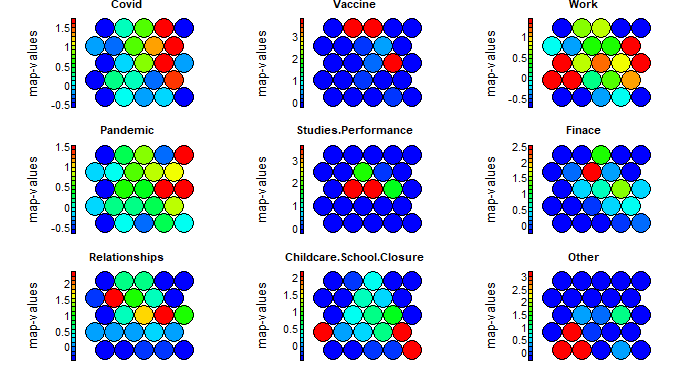


**Figure 6.S1.** SOM heatmap for inter-relationship between major stress factors and ethnicity (see code plot in Fig.5.S1 above)


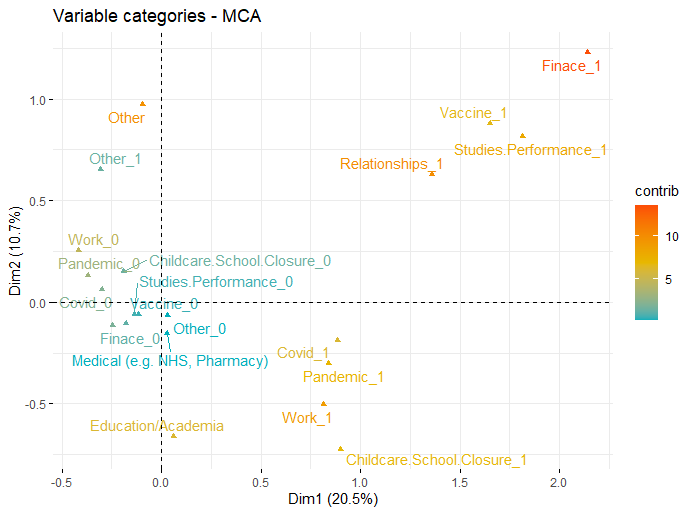


**Figure 7.S1.** MCA outcomes (1st two dimensions) indicating profession correspondence to major stress causes reported in public responses


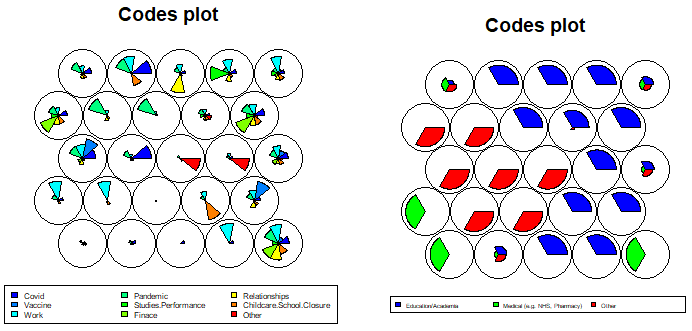


**Figure 8.S1.** SOM code plot for two-dimensional visualisation of inter-relationships between multiple stress causes (left side plot) within the dataset and participants’ profession


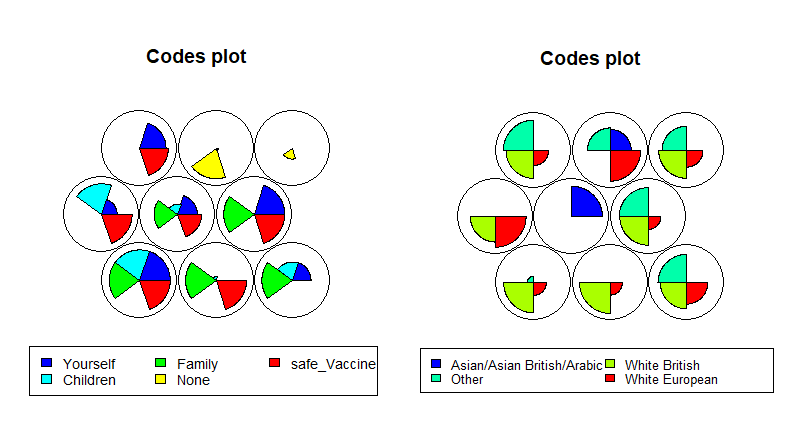


**Figure 9.S1.** SOM code plot for two-dimensional visualisation of inter-relationships between vaccination acceptance (left side plot) within the dataset and participants’ ethnicity


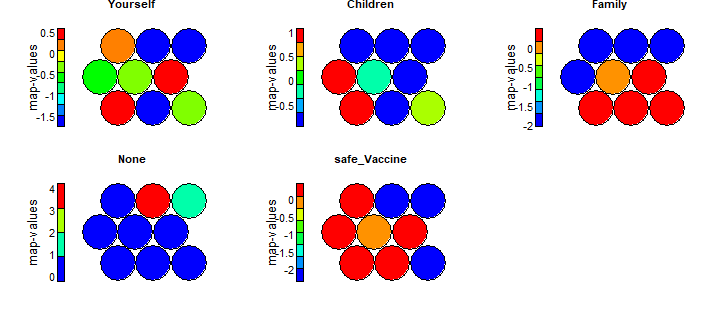


**Figure 10.S1.** SOM heatmap for individual relationships of vaccination acceptance and participant’s ethnicity (see code plot in Fig.9.S1 above)


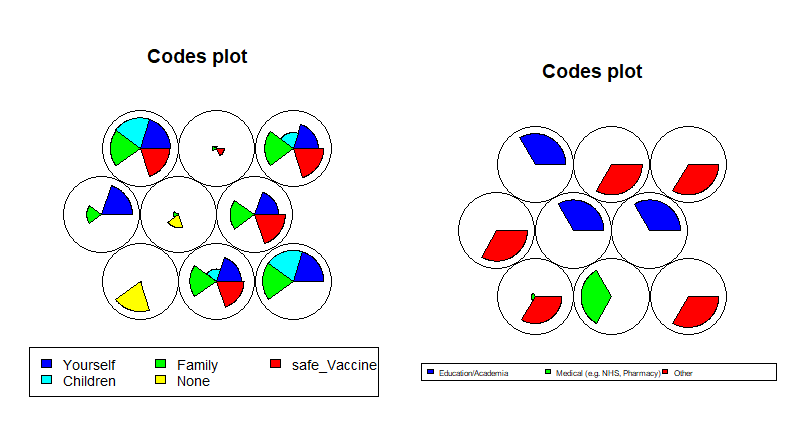


**Figure 11.S1.** SOM code plot for two-dimensional visualisation of inter-relationships between vaccination acceptance (left side plot) within the dataset and participants’ profession (right side plot)


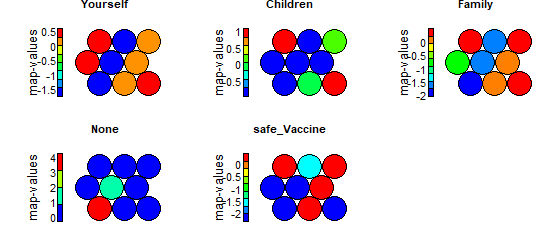


**Figure 12.S1.** SOM heatmap for individual relationships of vaccination acceptance and participant’s profession (see code plot in Fig.11.S1 above)


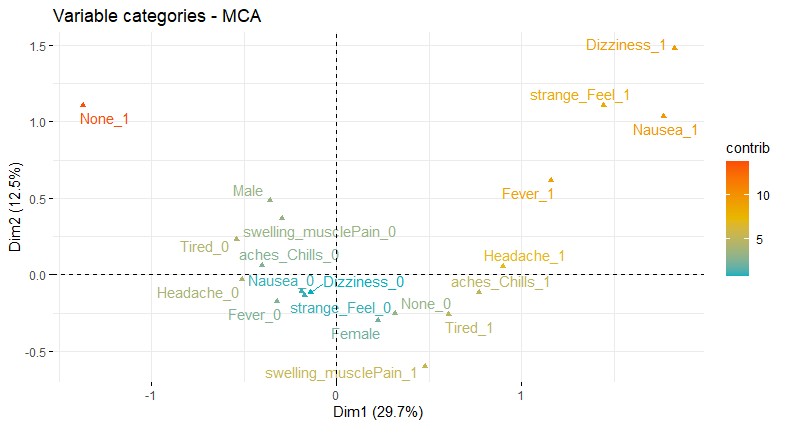


**Figure 13.S1.** MCA outcomes (1st two dimensions) indicating participants’ gender correspondence to vaccination side effects


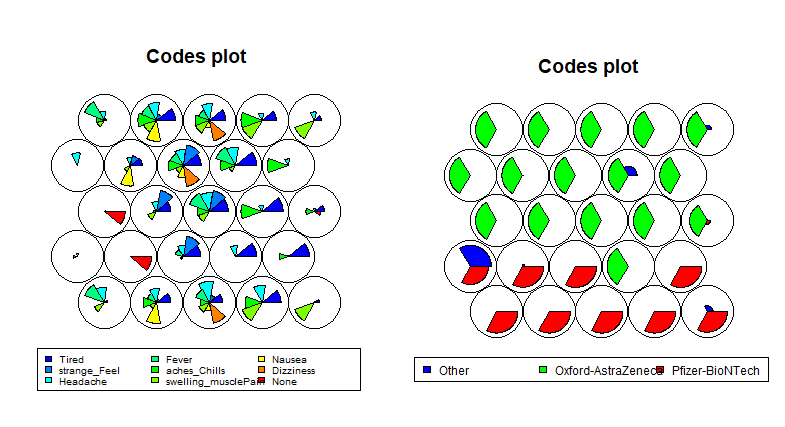


**Figure 14.S1.** SOM code plot for two-dimensional visualisation of inter-relationships between vaccination side effects (left side plot) and vaccination type (right side plot)
